# Supplementary material for: Genomic analysis of atypical fibroxanthoma
Source: PLoS One. 2017 Nov 15;12(11):e0188272. doi: 10.1371/journal.pone.0188272 (PMC5687749; doi:10.1371/journal.pone.0188272)
Supplement: S3 Table — (XLSX) [file pone.0188272.s005.xlsx]

## Sheet: Supplementary Table 3
Supplementary Table 3: Differentially Expressed Genes in Common between AFX compared to both Keratinocytes and Fibroblasts
logFC= Log2 Fold Change, logCPM= Log Counts per Million, LR = Log Ratios, FDR=False Discovery Rate
	AFX vs Keratinocytes						AFX vs Fibroblasts
Gene	logFC	logCPM	LR	PValue	FDR		logFC	logCPM	LR	PValue	FDR
FPR2	4.88985	-0.308329	12.6824	0.000369104	0.00125988		5.66589	-0.386238	13.6303	0.000222564	0.00147547
SOD3	-2.26431	1.03169	15.4315	8.55e-05	0.00033202		-4.71333	3.21457	39.4497	3.37e-10	8.2e-09
GLI3	1.09764	7.75467	21.3362	3.85e-06	1.93e-05		1.12635	7.80125	6.87188	0.00875627	0.0331861
ALDH1A1	-3.07479	5.68617	182.343	1.49e-41	6.59e-39		-7.61386	9.38336	245.154	2.96e-55	3.8e-52
TWISTNB	0.875013	5.12832	13.459	0.000243829	0.000865911		1.02975	5.14923	7.33139	0.00677605	0.0268252
TNFRSF9	2.69234	1.81772	25.704	3.98e-07	2.38e-06		9.47605	1.80772	47.1523	6.57e-12	2.11e-10
RHOH	1.08486	1.82061	6.25311	0.0123976	0.0286454		6.91394	1.513	49.4756	2.01e-12	6.97e-11
FNIP2	1.63662	6.64499	38.5818	5.25e-10	4.84e-09		1.48134	6.80549	10.4012	0.00125934	0.0065092
KRT7	-4.24965	3.20159	48.7764	2.87e-12	3.57e-11		-7.62651	5.57226	217.579	3.05e-49	2.69e-46
IGF1R	-0.701612	6.49581	10.1578	0.00143695	0.00426817		-1.60996	6.75359	26.6536	2.43e-07	3.41e-06
LOC643355	-4.79774	-0.339644	35.6263	2.39e-09	2.02e-08		-4.29571	-0.571178	15.8348	6.91e-05	0.000533233
CTHRC1	4.28806	6.95588	200.761	1.42e-45	9.92e-43		2.30828	7.32102	27.471	1.59e-07	2.33e-06
CHDH	-1.7299	0.486762	10.4079	0.00125475	0.00378349		-1.84957	0.39446	7.94241	0.00482895	0.0200918
AKAP13	0.815757	8.36528	11.0325	0.000895269	0.00280222		1.35303	8.27693	13.1396	0.000289113	0.00185347
ABCC1	-0.473906	5.63573	5.61955	0.0177612	0.0389504		-1.54385	5.97319	30.2038	3.89e-08	6.42e-07
LINC01128	1.0776	5.23544	19.9201	8.07e-06	3.81e-05		1.26113	5.26457	10.5471	0.00116369	0.00610597
KBTBD7	-1.68211	2.56994	22.2065	2.45e-06	1.27e-05		-1.18624	1.97825	6.04034	0.0139826	0.0483308
PTPRB	0.671435	5.77158	6.74357	0.0094086	0.0224707		3.34449	5.44478	49.4291	2.06e-12	7.12e-11
EEF1A1	-1.20425	9.21355	25.6264	4.14e-07	2.47e-06		-1.32717	8.95363	20.4373	6.16e-06	6.23e-05
RASGRP4	1.35523	1.50936	12.5967	0.000386422	0.00131108		7.4377	1.29393	47.0617	6.88e-12	2.2e-10
WFDC21P	-2.56762	1.8221	40.7804	1.7e-10	1.68e-09		-2.88484	1.6642	19.9832	7.81e-06	7.71e-05
GCLM	-0.863099	5.17087	13.754	0.000208379	0.000750619		-1.86023	5.48581	28.2238	1.08e-07	1.64e-06
CAND2	-1.48534	1.3391	16.0733	6.09e-05	0.000243597		-1.86262	1.27143	13.5569	0.000231441	0.00152585
ABHD2	1.76618	8.54733	32.5504	1.16e-08	8.89e-08		2.01217	8.66999	18.7336	1.5e-05	0.00013717
DRAXIN	7.38642	0.426697	44.1034	3.11e-11	3.38e-10		8.05464	0.444423	15.3801	8.79e-05	0.000657305
LOC100507420	1.16275	3.57477	8.37648	0.00380107	0.0101429		2.70389	3.38002	18.4804	1.72e-05	0.000154531
C1QL1	4.62047	-0.894049	16.4005	5.13e-05	0.000208411		2.97607	-0.994224	6.03396	0.0140332	0.0484757
NIPAL2	-1.82692	6.09033	49.9217	1.6e-12	2.06e-11		-0.998224	5.27717	7.66495	0.00563039	0.0229748
CMPK2	2.07117	4.21755	25.2663	4.99e-07	2.93e-06		4.15519	4.25752	33.5155	7.07e-09	1.33e-07
RSAD2	2.80577	5.15031	49.1301	2.4e-12	3.02e-11		6.28639	5.22286	107.774	3.01e-25	4.66e-23
TMEM209	0.560482	5.49383	8.32679	0.00390646	0.0103956		1.15143	5.33844	13.0853	0.000297616	0.00190288
MAPKBP1	-1.12151	4.65283	22.1935	2.47e-06	1.28e-05		-0.78874	4.14349	6.33202	0.0118577	0.0423154
FBXO41	-1.27912	1.54723	11.8636	0.000572407	0.00187227		-2.01743	1.54962	13.5954	0.000226736	0.00149984
ZNF699	1.56894	3.11717	22.2912	2.34e-06	1.22e-05		1.55965	3.19173	11.7699	0.000601972	0.00346953
NKG7	2.36294	1.65139	23.4458	1.28e-06	7.06e-06		9.21567	1.55644	44.4303	2.64e-11	7.83e-10
ALG11	-0.811111	2.6517	5.84413	0.0156291	0.0349132		-1.3291	2.69033	8.95467	0.00276761	0.0125928
APOL3	1.38967	5.19228	22.7255	1.87e-06	9.95e-06		1.52604	5.28868	9.58299	0.00196388	0.00943906
TMEM92	2.69786	1.5815	20.0526	7.53e-06	3.58e-05		2.3503	1.69383	11.2032	0.000816563	0.00448818
ZNF267	0.874737	5.40273	10.8162	0.00100616	0.00310686		2.17958	5.26432	22.8227	1.78e-06	2.05e-05
APOL1	2.09931	5.56624	39.5263	3.24e-10	3.07e-09		2.4742	5.68786	19.3302	1.1e-05	0.000104011
HK3	2.25182	0.271806	8.31616	0.0039294	0.0104514		7.73315	0.0837479	29.9991	4.32e-08	7.02e-07
LOC101927229	6.73267	3.68263	97.7177	4.82e-23	2.33e-21		8.61447	3.91133	36.5074	1.52e-09	3.27e-08
MS4A7	3.09386	4.58814	70.315	5.06e-17	1.18e-15		12.4257	4.68742	229.153	9.12e-52	9.53e-49
IQSEC1	1.2502	6.68809	27.3926	1.66e-07	1.05e-06		0.915599	6.84603	6.5948	0.0102277	0.0375499
PIK3AP1	1.33928	4.18867	15.2303	9.52e-05	0.000365961		6.75052	3.98503	122.488	1.81e-28	3.64e-26
GPRC5B	1.05934	4.96824	9.3742	0.00220061	0.00626014		2.29522	4.94262	9.83748	0.00170992	0.00841427
ADAM12	5.09676	8.95815	174.493	7.72e-40	2.91e-37		1.99928	9.38266	11.5198	0.000688606	0.00388322
LINC01094	0.729144	3.59501	7.0992	0.00771182	0.0188969		1.41519	3.41807	11.9812	0.000537396	0.00315054
ICAM3	0.936884	3.16489	5.9002	0.0151392	0.0339656		1.35328	3.07626	9.37935	0.00219443	0.0103304
SPP1	4.65036	5.86352	28.0961	1.15e-07	7.52e-07		4.96635	6.08182	20.2416	6.83e-06	6.84e-05
SLC41A2	2.24539	5.25997	47.7958	4.73e-12	5.74e-11		1.13932	5.57206	7.8167	0.00517657	0.0213575
KLHDC9	-1.65779	-0.433844	7.36505	0.00665037	0.0165628		-1.71044	-0.714342	6.44414	0.0111319	0.0402926
GLI2	-2.35392	3.93668	13.0757	0.000299148	0.00104393		-3.16209	4.83868	20.1818	7.04e-06	7.04e-05
ABI3BP	2.77707	8.69119	61.0348	5.61e-15	1e-13		3.83262	8.8253	55.3935	9.87e-14	4.28e-12
DUXAP10	2.69848	-0.372991	10.1951	0.00140811	0.00419284		6.87895	-0.55622	17.117	3.51e-05	0.000290593
KLRG1	1.4786	0.655983	5.52772	0.0187175	0.0407414		1.96129	0.443783	7.72446	0.00544778	0.0223168
PCDH12	1.97119	3.5917	36.8596	1.27e-09	1.11e-08		4.46974	3.57997	58.4815	2.05e-14	1e-12
RHCE	1.1713	0.217995	5.21142	0.022439	0.0475495		1.82706	0.0204411	6.54907	0.0104939	0.0383149
SLC7A5	-1.09914	5.97619	7.89942	0.00494505	0.0128		-2.4799	6.48609	24.8516	6.19e-07	7.92e-06
ITGAX	2.63526	3.96392	80.9165	2.35e-19	7.22e-18		11.7506	4.01687	163.889	1.6e-37	6.69e-35
PRND	2.55742	3.10772	16.4818	4.91e-05	0.00020057		6.58105	3.25142	26.7104	2.36e-07	3.32e-06
LDOC1	-3.11893	2.49604	51.8444	6.01e-13	8.09e-12		-4.06934	2.92647	70.7817	3.99e-17	2.74e-15
LOC100507217	-0.775868	3.77871	7.60362	0.00582511	0.0147552		-1.12768	3.65668	6.29111	0.0121345	0.0430459
TRPA1	3.03179	2.29336	34.5719	4.11e-09	3.35e-08		2.26332	2.51617	9.02857	0.00265793	0.0121366
AK3	-1.67838	5.96804	47.0513	6.92e-12	8.24e-11		-1.34946	5.38841	16.3576	5.24e-05	0.000417318
TUBA1C	0.785052	9.15198	6.19751	0.012793	0.029394		1.05416	9.01568	7.02829	0.00802319	0.0308567
CCL4	2.50149	1.50079	15.7578	7.2e-05	0.000283536		9.12785	1.45883	44.3619	2.73e-11	8.09e-10
LILRB3	2.19453	1.55229	20.5288	5.87e-06	2.85e-05		3.64414	1.51292	25.0421	5.61e-07	7.25e-06
FNDC1	5.1745	6.31838	88.6963	4.6e-21	1.75e-19		2.58551	6.67001	13.3353	0.000260459	0.00169445
DYRK1B	-1.77786	2.01121	22.6059	1.99e-06	1.05e-05		-2.32388	1.99582	20.068	7.47e-06	7.41e-05
MGEA5	-0.715282	7.87096	9.167	0.00246418	0.00691751		-0.843167	7.69756	7.11523	0.00764318	0.0296268
MLLT3	-0.771146	4.44646	9.39701	0.0021734	0.00619343		-1.99709	4.94215	30.082	4.14e-08	6.76e-07
KIAA1211	2.38426	3.3155	25.5187	4.38e-07	2.6e-06		3.10473	3.46749	12.9505	0.000319829	0.00202342
AGPAT4	1.6548	4.97591	35.0855	3.16e-09	2.61e-08		1.59879	5.06174	16.011	6.3e-05	0.000490843
EGF	-4.02372	0.895504	38.6816	4.99e-10	4.61e-09		-2.22026	-0.797732	7.36459	0.00665209	0.0263969
SEMA3E	-4.84219	1.93751	43.7885	3.66e-11	3.94e-10		-2.30901	0.0207254	6.09119	0.0135858	0.0471932
EDA2R	-1.52953	2.27425	11.5605	0.00067367	0.0021663		-4.01771	4.07096	59.6738	1.12e-14	5.73e-13
ROR2	3.17284	4.50058	83.5749	6.13e-20	2.03e-18		2.00953	4.79248	13.1864	0.000281991	0.00181477
ALDH9A1	-1.14232	7.09524	21.2846	3.96e-06	1.98e-05		-0.779601	6.52602	6.59432	0.0102305	0.0375499
LINC01524	5.11657	1.48198	24.466	7.56e-07	4.32e-06		7.06087	1.5872	21.3252	3.88e-06	4.13e-05
SLC2A5	1.25137	2.07001	7.77323	0.00530263	0.0136127		2.39736	2.03491	9.25834	0.00234426	0.0109331
NOTCH2NL	0.560775	6.74203	5.6853	0.0171076	0.0377226		1.21545	6.61798	6.3103	0.0120038	0.0426947
AKAP6	-0.844556	3.66018	6.92473	0.00850117	0.0205584		-2.68388	4.53638	42.5964	6.73e-11	1.86e-09
CLIP4	-1.03145	6.19764	25.5644	4.28e-07	2.55e-06		-1.44339	6.15111	19.9449	7.97e-06	7.86e-05
PPEF1	2.22925	0.998227	11.3309	0.000762292	0.002425		8.51334	0.906164	27.3515	1.7e-07	2.46e-06
SPAG9	1.07116	7.79584	24.4133	7.77e-07	4.42e-06		0.808464	7.89224	6.92106	0.00851866	0.0324046
GPR153	1.35765	4.32274	14.517	0.000138898	0.000519032		1.886	4.36198	12.7963	0.0003473	0.00216858
PTGER4	1.25784	3.77084	20.0125	7.69e-06	3.65e-05		4.8875	3.58891	65.3134	6.39e-16	3.93e-14
LINC00943	2.9567	-0.535537	10.02	0.00154847	0.00456645		6.69883	-0.741759	19.61	9.5e-06	9.15e-05
LYNX1	-2.70441	3.06983	44.6	2.42e-11	2.67e-10		-3.16082	3.10178	31.3785	2.12e-08	3.65e-07
DYRK3	3.11949	4.88409	59.4207	1.27e-14	2.18e-13		1.75382	5.22374	9.34836	0.00223186	0.010474
BRE	1.75564	5.93247	43.3307	4.62e-11	4.92e-10		1.41018	6.11413	14.2436	0.000160604	0.00111186
FER1L4	-2.16649	0.800112	12.8942	0.000329601	0.0011377		-2.64068	0.550353	6.77563	0.0092411	0.0346795
TMEM233	3.89005	-0.0365651	14.6835	0.000127153	0.000478007		5.81144	-0.156812	23.0021	1.62e-06	1.88e-05
SIGLEC9	3.0937	1.78101	38.56	5.31e-10	4.89e-09		7.20338	1.77869	65.4639	5.92e-16	3.65e-14
ADAMTS15	-3.19469	2.50966	48.9045	2.69e-12	3.35e-11		-2.7733	1.65847	22.6109	1.98e-06	2.26e-05
HEBP2	-1.13454	5.18648	25.8682	3.66e-07	2.2e-06		-1.22723	4.94808	12.7891	0.00034864	0.00217588
CDKL2	-6.08491	3.73427	191.377	1.59e-43	8.73e-41		-2.15806	-0.0449983	7.73258	0.00542333	0.0222275
CHSY1	1.58632	6.96503	46.9203	7.39e-12	8.78e-11		1.29596	7.13399	12.0592	0.000515365	0.00303886
CSF3R	2.24549	2.55951	11.6092	0.000656256	0.00211669		5.81538	2.53378	30.0373	4.24e-08	6.9e-07
LINC00933	-1.67945	0.138596	6.68981	0.00969655	0.0230913		-1.89965	0.0417855	7.89971	0.00494427	0.0205206
PLCB2	0.926865	2.94446	8.93289	0.00280081	0.00774361		8.0998	2.63468	83.9902	4.97e-20	4.54e-18
C21orf33	-1.23133	5.20486	17.4355	2.97e-05	0.000126709		-1.062	4.63035	10.1839	0.00141672	0.00716978
HSPB1	-1.02666	7.13767	21.7459	3.11e-06	1.58e-05		-0.831093	6.76882	6.39845	0.011422	0.0410407
PROK2	2.83994	1.06041	9.40172	0.00216782	0.0061824		8.70151	1.04404	26.6037	2.5e-07	3.49e-06
FCER1G	3.09239	5.23622	87.5364	8.27e-21	3.02e-19		8.72391	5.35456	158.118	2.92e-36	1.11e-33
SLAMF1	1.36173	0.696889	8.38193	0.0037897	0.0101191		7.98948	0.392014	39.564	3.17e-10	7.8e-09
GUCY1A3	2.55737	6.48368	56.2617	6.34e-14	9.83e-13		3.79137	6.62165	27.2909	1.75e-07	2.53e-06
SPSB1	1.34558	5.70099	29.2214	6.46e-08	4.39e-07		1.7732	5.7282	19.341	1.09e-05	0.000103549
KNDC1	-3.90236	0.034827	24.7216	6.62e-07	3.82e-06		-3.10155	-1.19992	7.54076	0.00603187	0.0243223
NME5	-2.47522	-0.291059	9.79436	0.00175048	0.00509411		-4.04341	0.645771	29.8512	4.67e-08	7.54e-07
HIVEP1	0.63807	7.6904	7.54297	0.00602447	0.0151942		1.05978	7.5891	7.44496	0.00636145	0.0254549
CFD	-3.75158	3.43033	98.6475	3.02e-23	1.52e-21		-1.95324	1.52345	8.68744	0.0032041	0.0142418
LGALS3BP	1.96675	6.94027	44.0961	3.13e-11	3.39e-10		1.66183	7.11368	14.6466	0.000129668	0.000922958
ST8SIA1	1.18613	3.62549	10.1487	0.001444	0.00428489		5.53637	3.54635	36.6555	1.41e-09	3.05e-08
CLEC12A	3.55246	2.64424	73.3076	1.11e-17	2.79e-16		7.7024	2.74513	58.3515	2.19e-14	1.06e-12
GOLM1	2.74662	7.5448	106.989	4.48e-25	2.92e-23		1.75449	7.83956	20.0867	7.4e-06	7.35e-05
MLLT11	1.50787	4.12233	21.7417	3.12e-06	1.59e-05		1.33241	4.26695	6.71757	0.00954676	0.0355791
FAM180A	3.85792	4.85624	80.4259	3.02e-19	9.21e-18		1.69594	5.23439	10.3784	0.00127498	0.0065778
PTPN22	1.55596	3.77082	17.8968	2.33e-05	0.000101647		5.08893	3.66683	62.0951	3.27e-15	1.78e-13
RHOD	-2.30488	4.01199	52.7098	3.87e-13	5.36e-12		-1.49795	3.21728	6.69686	0.00965826	0.0359061
RNF157	4.17111	3.79555	91.102	1.36e-21	5.58e-20		4.00497	4.02043	23.8084	1.06e-06	1.28e-05
ZC3H12B	-2.059	1.34066	17.3201	3.16e-05	0.000133788		-2.7285	1.71727	18.3131	1.87e-05	0.000166557
MILR1	3.35888	-0.330053	12.7868	0.00034907	0.00119737		2.74042	-0.403661	7.49853	0.00617495	0.0248096
KLHL4	2.41378	2.09122	7.50265	0.00616083	0.015482		3.5834	2.1597	8.18376	0.00422672	0.0179797
XAF1	1.36036	7.00952	12.0943	0.000505761	0.00167455		1.22056	7.15474	7.08233	0.00778476	0.0300955
TSPAN31	-0.673458	2.92031	5.51016	0.0189063	0.0410881		-1.46418	2.9618	9.1131	0.00253785	0.0116808
CLCN4	1.59216	2.40806	9.05539	0.00261921	0.00729615		2.44465	2.47416	7.05593	0.00790031	0.0304542
MYEF2	-1.36138	2.33439	10.4501	0.00122645	0.00370894		-1.93708	2.51167	12.6868	0.000368252	0.00228295
GBP1	2.22254	7.1013	31.8081	1.7e-08	1.27e-07		1.30863	7.41102	6.55065	0.0104846	0.0382978
CXCL2	1.78516	2.16879	5.84895	0.0155864	0.0348264		3.43593	2.24062	8.90194	0.00284868	0.0128921
EPHB2	2.39628	5.55194	45.4827	1.54e-11	1.75e-10		3.22398	5.65006	62.2143	3.08e-15	1.68e-13
GPR126	-3.42339	5.32776	117.672	2.05e-27	1.71e-25		-1.38417	3.41667	6.63441	0.0100027	0.0369084
PPAPDC2	-2.04536	3.6392	53.2999	2.86e-13	4.05e-12		-1.06385	2.66448	6.27917	0.0122165	0.0432325
PROSER2	-2.73641	1.53347	39.6756	3e-10	2.86e-09		-1.60968	0.295581	7.79594	0.00523639	0.0215671
SCPEP1	1.14075	6.65316	12.1304	0.000496061	0.00164544		1.62203	6.71741	9.45486	0.00210591	0.00998962
PAG1	1.21133	6.35177	18.5893	1.62e-05	7.26e-05		3.00304	6.28953	31.332	2.17e-08	3.73e-07
P2RY10	1.40176	0.933089	6.69921	0.00964554	0.0229789		8.17089	0.571666	40.9567	1.56e-10	4.05e-09
PODXL	0.871483	6.18258	9.17219	0.0024572	0.00690113		1.59499	6.10906	11.6127	0.000655041	0.00372281
PRSS12	-2.82217	4.29955	80.4141	3.04e-19	9.25e-18		-5.70056	6.53142	163.829	1.65e-37	6.72e-35
SNX10	0.900062	3.3097	7.95047	0.00480748	0.0124898		9.14926	2.97807	93.7187	3.64e-22	4.17e-20
CREB5	1.31441	6.84562	9.21732	0.00239736	0.00675717		1.8848	6.85799	8.67086	0.00323338	0.014349
PDDC1	-0.651529	3.62981	6.39709	0.0114307	0.0266668		-1.33376	3.69254	10.69	0.00107718	0.00572329
DRD1	-3.8218	-0.800988	11.1103	0.000858501	0.00269834		-3.13483	-1.25988	9.05986	0.00261282	0.0119797
LOC101928650	3.77081	1.59157	38.827	4.63e-10	4.3e-09		2.78821	1.76266	11.2997	0.000775202	0.00429042
HIST1H2BH	0.893186	3.38738	8.54419	0.00346627	0.00935624		1.37281	3.31081	5.996	0.0143384	0.0492248
CLEC1B	4.4638	0.247261	22.2916	2.34e-06	1.22e-05		7.74769	0.219352	18.3969	1.79e-05	0.000160672
CMKLR1	3.66641	5.49814	81.5212	1.73e-19	5.37e-18		8.88718	5.67951	112.71	2.5e-26	4.18e-24
TMEM64	0.882382	6.04948	7.32024	0.00681823	0.0169366		1.91775	5.99878	13.7969	0.000203674	0.00136813
KIF21B	1.24598	2.1273	11.0363	0.000893431	0.00279792		5.9738	1.90256	49.6216	1.86e-12	6.54e-11
MS4A6A	2.61825	4.84415	49.243	2.26e-12	2.85e-11		12.6239	4.88448	243.333	7.38e-55	8.81e-52
ACO1	-1.45883	7.55342	19.3753	1.07e-05	4.95e-05		-1.1705	6.73889	13.4292	0.000247743	0.00162182
UPP1	2.15358	4.00217	21.7878	3.05e-06	1.55e-05		1.28217	4.10551	6.66766	0.00981782	0.0363755
LOC101928988	-5.07535	0.391999	68.1107	1.55e-16	3.36e-15		-3.08597	-1.32297	9.3202	0.00226641	0.0106244
SLC35G1	-2.31966	2.30653	22.4064	2.21e-06	1.16e-05		-1.54318	1.64089	6.20723	0.012723	0.044782
MGMT	-1.12986	2.25415	8.2899	0.00398662	0.0105778		-1.4045	2.18142	5.97173	0.014537	0.0498047
CC2D1A	-0.880453	3.12568	7.24783	0.00709867	0.0175537		-1.34767	3.05366	9.5324	0.00201875	0.00965838
FCGR1B	2.4037	0.739373	19.9343	8.01e-06	3.79e-05		6.73186	0.60526	37.6004	8.68e-10	1.96e-08
TRHDE	-5.63594	1.73774	110.266	8.57e-26	6.04e-24		-9.09955	4.37239	341.247	3.42e-76	5.71e-72
TTC21A	1.51087	1.96918	15.7957	7.06e-05	0.00027821		1.523	1.98018	8.3503	0.00385624	0.0166187
NLRP3	1.96215	1.45805	19.5496	9.8e-06	4.55e-05		7.45443	1.32953	49.5715	1.91e-12	6.67e-11
L1CAM	-2.16469	1.57923	24.4359	7.68e-07	4.38e-06		-7.1973	5.77632	107.032	4.38e-25	6.48e-23
ABCA8	-2.46479	3.33362	35.8753	2.1e-09	1.79e-08		-2.65549	3.09223	17.242	3.29e-05	0.000274392
NRP2	3.37622	7.56147	141.579	1.2e-32	1.8e-30		2.32835	7.8448	42.3503	7.63e-11	2.08e-09
AACS	-2.5717	5.37099	69.4994	7.64e-17	1.74e-15		-1.00055	3.72479	6.83139	0.00895694	0.033807
BACE2	1.73393	6.73995	40.9212	1.58e-10	1.57e-09		1.55372	6.86666	20.0954	7.37e-06	7.32e-05
STX6	-0.539302	6.17167	7.77954	0.00528413	0.0135733		-0.964532	6.15458	11.0614	0.000881442	0.00479162
MNS1	0.750974	3.68218	6.83985	0.00891461	0.0214294		1.42745	3.56896	9.21577	0.0023994	0.0111417
LOC101928272	5.46485	2.74877	98.3906	3.43e-23	1.71e-21		7.07458	2.91278	47.6803	5.02e-12	1.64e-10
HPSE2	-2.66719	-0.458328	10.0164	0.00155154	0.00457476		-6.8472	2.56438	56.0928	6.91e-14	3.1e-12
ZNF474	1.6417	0.476842	6.47248	0.0109557	0.0257045		2.86004	0.265462	10.2884	0.00133869	0.00683902
SERPINF1	2.37107	7.57321	38.819	4.65e-10	4.32e-09		1.77297	7.83395	11.5968	0.000660652	0.00374833
SLC11A1	3.6292	2.55489	53.0473	3.26e-13	4.58e-12		6.15003	2.66922	45.8317	1.29e-11	4.01e-10
LOC101927588	3.91666	-1.28765	10.7951	0.00101772	0.00313988		5.86834	-1.51737	10.6661	0.00109116	0.00578105
SFRP1	-2.67244	7.56183	26.9596	2.08e-07	1.3e-06		-2.15708	6.70325	21.2731	3.98e-06	4.22e-05
CPB1	5.34046	0.305602	16.449	5e-05	0.000203694		7.80878	0.276917	20.5689	5.75e-06	5.86e-05
TLR7	3.01257	2.4175	35.6225	2.4e-09	2.02e-08		10.1476	2.45385	76.2362	2.52e-18	1.95e-16
HOXD4	1.54519	-0.0488987	7.64225	0.00570167	0.0145013		4.28749	-0.319013	13.0584	0.000301935	0.00192755
CCR1	3.50068	3.342	50.7371	1.06e-12	1.39e-11		8.39569	3.42385	110.058	9.52e-26	1.52e-23
CCNDBP1	-0.705486	5.17518	7.76117	0.00533813	0.0136883		-1.04321	5.11413	9.59189	0.00195439	0.00941235
SSBP2	-1.26834	5.50594	16.2012	5.7e-05	0.00022896		-1.03213	5.10599	7.37904	0.00659884	0.0262364
PPFIA4	-1.22254	0.59086	6.90821	0.00858006	0.0207215		-3.00974	1.2929	18.3179	1.87e-05	0.000166232
OAS2	2.05946	7.07126	26.0764	3.28e-07	1.99e-06		3.59486	7.08917	33.8309	6.01e-09	1.15e-07
PGM2L1	2.49872	5.2992	89.0244	3.9e-21	1.5e-19		1.66453	5.55547	22.1025	2.58e-06	2.86e-05
GNG2	2.16172	4.80869	69.3881	8.09e-17	1.83e-15		1.16909	5.0886	8.08843	0.00445488	0.0187878
NCF2	0.776101	3.46572	6.57819	0.0103236	0.0244271		4.01982	3.17813	45.1986	1.78e-11	5.41e-10
FLJ46906	1.19276	2.51973	7.50227	0.00616211	0.0154831		1.96018	2.47444	8.53046	0.00349252	0.0152421
LINC01480	2.15741	-0.760102	7.06719	0.00785081	0.0192063		6.46352	-1.05665	16.0531	6.16e-05	0.000481616
COMT	-0.656778	6.21498	10.3397	0.00130198	0.00390961		-0.918442	6.07748	9.44896	0.00211269	0.0100133
SYNGR1	-2.57596	4.02039	52.3761	4.58e-13	6.29e-12		-2.29186	3.37053	19.0369	1.28e-05	0.00011927
SCIMP	1.59154	0.737676	7.91996	0.00488924	0.0126737		3.87328	0.550533	22.4591	2.15e-06	2.43e-05
EMP1	1.27747	8.44017	23.7297	1.11e-06	6.17e-06		0.980742	8.56286	7.22208	0.00720122	0.0282343
CXCL10	1.49991	4.68795	7.16675	0.00742673	0.0182825		10.5114	4.49392	76.4021	2.31e-18	1.8e-16
CCR5	1.62755	2.31323	15.955	6.49e-05	0.000257372		9.81218	2.12709	72.9884	1.3e-17	9.57e-16
SIT1	2.06591	0.0739674	14.5436	0.000136956	0.000512197		7.39148	-0.151575	39.8225	2.78e-10	6.91e-09
OR4F13P	3.3242	-0.564789	14.0825	0.000174963	0.000639657		6.75418	-0.73584	17.1054	3.54e-05	0.000292074
LHFPL2	3.23745	8.00296	175.113	5.66e-40	2.18e-37		2.96005	8.23995	51.9348	5.74e-13	2.22e-11
PTPRC	1.07175	6.26069	19.9251	8.05e-06	3.8e-05		6.30781	5.99889	97.7979	4.63e-23	5.74e-21
GPR4	1.7103	1.96924	11.0065	0.000907918	0.00283691		2.87047	1.93172	15.7012	7.42e-05	0.000568074
ZNF93	1.79795	4.83764	29.6837	5.09e-08	3.52e-07		1.74768	4.96341	14.4494	0.000143979	0.00101099
NADK2	1.22756	5.74813	18.5651	1.64e-05	7.34e-05		1.0286	5.87349	7.32013	0.00681866	0.0269455
LOC101928940	2.39684	-0.260095	8.44488	0.00366072	0.00981961		2.52075	-0.328989	6.31085	0.0120002	0.0426947
LYPD6B	-4.40114	3.12345	73.682	9.18e-18	2.34e-16		-2.1314	0.634082	9.06772	0.00260161	0.011938
CD4	2.01408	5.15909	73.912	8.17e-18	2.09e-16		5.77454	5.13692	173.617	1.2e-39	5.9e-37
EDNRA	1.54273	5.78262	10.6468	0.00110259	0.00337641		2.29235	5.96188	8.85201	0.00292766	0.0131918
TPK1	1.83128	2.99437	22.2946	2.34e-06	1.22e-05		2.68008	2.9994	22.9805	1.64e-06	1.9e-05
CCDC8	-2.0272	1.34452	13.4799	0.000241136	0.000856854		-3.4385	2.38367	18.9539	1.34e-05	0.000123957
WIPF1	3.19721	7.01972	166.7	3.89e-38	1.1e-35		1.16559	7.44363	13.2186	0.000277187	0.00179167
PPFIA2	2.93332	3.68193	24.5018	7.42e-07	4.25e-06		4.648	3.80519	38.8714	4.53e-10	1.07e-08
PLCE1	-1.12767	3.31874	6.0663	0.0137785	0.0313009		-2.49597	4.19424	20.3209	6.55e-06	6.59e-05
PCDH17	2.06942	4.0533	22.0593	2.64e-06	1.36e-05		11.721	3.98337	89.9523	2.44e-21	2.57e-19
LPXN	3.05641	5.19411	116.192	4.32e-27	3.52e-25		1.21338	5.59506	7.78082	0.0052804	0.0217216
GSE1	-0.545506	6.18433	5.9384	0.0148144	0.0333486		-0.763275	6.08071	6.80791	0.00907548	0.0341807
SIGLEC12	2.90272	-0.965053	6.49119	0.010841	0.0254716		6.08453	-1.22823	12.2122	0.000474783	0.00283093
LTA4H	-0.974425	5.38982	13.6986	0.000214615	0.000770631		-1.01405	5.19327	7.7774	0.00529038	0.0217573
TREML2	3.32256	0.341444	22.3709	2.25e-06	1.18e-05		7.91224	0.281175	25.1634	5.27e-07	6.85e-06
LRRC32	3.67495	7.00516	102.946	3.44e-24	1.98e-22		2.25596	7.33512	12.1131	0.00050069	0.00296549
HOXD8	1.31153	3.14534	13.3102	0.00026397	0.000930501		2.5643	2.98439	25.1049	5.43e-07	7.03e-06
LOC101927027	1.08988	4.29007	19.4511	1.03e-05	4.77e-05		1.25194	4.29415	11.6541	0.00064062	0.00365451
LOC728613	-1.14588	1.42704	10.766	0.00103383	0.00318742		-1.61753	1.4717	10.1306	0.00145826	0.00735109
RPL3	-1.71331	9.57148	41.6266	1.1e-10	1.12e-09		-0.881135	8.72673	7.68349	0.00557282	0.0227621
FAM129A	1.81324	7.51032	52.9995	3.34e-13	4.68e-12		1.3357	7.72522	9.97433	0.00158738	0.00790194
ISLR2	3.1435	0.434638	17.6671	2.63e-05	0.000113112		6.11158	0.376599	20.0514	7.54e-06	7.47e-05
KCNN3	0.867554	3.77291	9.69666	0.00184603	0.00534555		8.34189	3.44734	119.712	7.31e-28	1.37e-25
PLEKHH3	-0.956776	2.12642	7.75697	0.00535057	0.0137163		-1.45083	1.97247	6.12705	0.0133129	0.0464286
PRF1	1.74165	1.12865	8.80063	0.00301126	0.00826145		8.6181	0.972369	35.7295	2.27e-09	4.72e-08
NATD1	-0.747599	3.49664	7.29858	0.00690092	0.0171161		-2.33409	4.16299	45.7562	1.34e-11	4.15e-10
CES1	-3.38311	-0.74442	22.7211	1.87e-06	9.97e-06		-5.10729	0.479882	35.36	2.74e-09	5.62e-08
NRN1	2.07374	4.93155	55.6109	8.83e-14	1.35e-12		4.95707	4.91872	60.4776	7.44e-15	3.88e-13
MAPRE3	-1.1321	2.1793	11.8297	0.000582944	0.00190261		-1.62664	2.06302	10.6586	0.0010956	0.00579722
RIMS1	-4.77328	0.414131	14.9524	0.000110256	0.000419628		-2.85497	-0.834861	7.46011	0.00630813	0.0252839
LINC01139	1.03695	5.07569	5.93223	0.0148664	0.0334448		7.53293	4.8259	64.9393	7.72e-16	4.72e-14
ST8SIA4	1.46593	4.3643	33.1683	8.45e-09	6.6e-08		7.25097	4.22641	99.9429	1.57e-23	2e-21
RPL19P12	-1.54317	-0.0949819	10.9329	0.000944696	0.00294116		-4.55328	1.11423	19.7668	8.75e-06	8.53e-05
GZMB	1.14574	1.57138	5.65856	0.0173704	0.0381857		9.10273	1.4297	33.2098	8.27e-09	1.53e-07
TPST2	1.55763	4.98503	26.9889	2.05e-07	1.28e-06		1.21549	5.1589	8.34866	0.00385972	0.0166214
ETFA	-1.16774	5.25152	22.9215	1.69e-06	9.04e-06		-1.43771	5.05456	16.3736	5.2e-05	0.000414404
PITX2	1.61787	2.41481	9.6408	0.00190302	0.00549037		1.94221	2.44123	7.10942	0.00766797	0.0297161
ANKRD9	-1.07806	0.664647	7.00044	0.00814895	0.0198365		-2.11234	0.685758	10.084	0.0014956	0.00750765
CD74	1.13967	9.4388	18.1624	2.03e-05	8.93e-05		9.59995	9.21893	180.433	3.9e-41	2.17e-38
DUXAP8	2.66353	1.81515	14.702	0.00012591	0.00047343		9.49662	1.82737	31.4369	2.06e-08	3.56e-07
CADM2	-5.3532	0.471813	29.3898	5.92e-08	4.05e-07		-4.39703	-0.0277456	15.0832	0.000102877	0.000754983
NR1D1	1.21348	5.89049	20.9151	4.8e-06	2.37e-05		1.21259	5.93762	8.55959	0.00343707	0.0150454
RABGAP1	-0.762178	6.62705	15.5443	8.06e-05	0.000314473		-1.72394	6.91357	24.6657	6.82e-07	8.63e-06
GFRA2	1.6217	0.0390589	6.04746	0.0139263	0.0315771		4.67011	-0.234087	12.3194	0.000448282	0.00270027
FLI1	1.17549	4.80723	20.6236	5.59e-06	2.72e-05		0.859241	4.89432	6.41315	0.0113278	0.0408076
SPOCK2	1.40228	2.4245	9.47716	0.00208046	0.00595765		7.30085	2.12213	64.0909	1.19e-15	7e-14
LOC100288152	-2.60697	1.88617	31.9899	1.55e-08	1.16e-07		-2.15511	0.826935	9.77049	0.00177335	0.00868524
NUAK2	-1.34925	3.12772	11.939	0.000549717	0.00180556		-1.5063	2.8516	9.61458	0.00193039	0.00932869
SLC1A3	0.863328	5.76609	13.2244	0.000276325	0.000970272		2.64753	5.58759	19.7654	8.76e-06	8.53e-05
RRAD	3.19165	0.760652	17.66	2.64e-05	0.000113456		2.67474	0.828877	10.0754	0.00150259	0.00753142
TPT1	-1.44873	11.6826	23.5178	1.24e-06	6.83e-06		-0.959571	11.1182	6.02774	0.0140827	0.0485991
SLC6A9	-1.4428	4.42368	25.5293	4.36e-07	2.59e-06		-2.32083	4.64357	38.5775	5.26e-10	1.23e-08
GAMT	-1.44567	1.25351	10.1901	0.00141197	0.00420294		-2.62937	1.68367	15.5504	8.03e-05	0.000607402
LILRB1	3.52715	1.82934	56.7772	4.88e-14	7.68e-13		9.57762	1.88314	73.2024	1.17e-17	8.62e-16
SHF	-2.40481	1.13079	17.6902	2.6e-05	0.00011196		-2.45161	0.966719	10.8767	0.000973837	0.00523911
RAB42	4.32945	1.37205	63.6987	1.45e-15	2.81e-14		2.93345	1.50324	16.7301	4.31e-05	0.000349363
NHSL2	1.87857	4.83465	28.9908	7.27e-08	4.9e-07		2.16073	4.97689	13.3931	0.000252553	0.00164944
RASGRF1	2.24092	1.79029	9.94994	0.00160855	0.00472054		4.91668	1.82592	19.3215	1.1e-05	0.000104375
CRIM1	-1.1986	7.07115	32.7732	1.04e-08	7.98e-08		-4.20763	9.0065	170.592	5.49e-39	2.48e-36
FERMT3	1.90899	2.60652	25.3234	4.85e-07	2.86e-06		3.68946	2.57004	40.8267	1.66e-10	4.31e-09
LOC100505622	3.86529	-1.21249	8.32322	0.00391415	0.0104145		3.137	-1.3989	6.70194	0.00963079	0.0358364
SLC6A17	-2.32121	3.0366	22.7061	1.89e-06	1e-05		-1.78512	2.458	8.59051	0.00337919	0.0148512
SBSPON	-3.02283	2.57315	52.1761	5.07e-13	6.93e-12		-5.63701	4.47539	143.655	4.23e-33	1.3e-30
GMFG	1.18245	2.72255	13.3453	0.000259067	0.000914643		3.80136	2.52738	42.6063	6.69e-11	1.86e-09
SRGN	2.02039	5.35754	39.9102	2.66e-10	2.55e-09		2.39684	5.46175	20.338	6.49e-06	6.54e-05
BAALC	2.08534	4.18164	17.1432	3.47e-05	0.000146047		3.32214	4.28486	21.0293	4.52e-06	4.73e-05
FMNL1	2.29092	4.22944	73.1421	1.21e-17	3.01e-16		2.38629	4.3622	32.2505	1.36e-08	2.41e-07
PPDPF	-0.910713	6.16036	18.1684	2.02e-05	8.91e-05		-1.17447	6.05036	11.3538	0.000752922	0.0041936
OIT3	2.54326	-0.673587	7.39575	0.00653782	0.0163184		3.07522	-0.936028	9.13764	0.00250404	0.0115538
PSMB9	1.74704	5.40642	29.3136	6.16e-08	4.2e-07		1.64983	5.55755	10.6789	0.00108366	0.00575225
MYO1F	1.22346	2.63287	15.6485	7.63e-05	0.000299031		3.05826	2.46987	24.2678	8.38e-07	1.03e-05
TMSB4X	1.93415	8.79882	59.2435	1.39e-14	2.37e-13		0.869836	9.0969	6.38606	0.011502	0.0411966
CECR1	0.981052	5.33915	16.9546	3.83e-05	0.000159821		1.20971	5.31058	8.04416	0.00456506	0.0191629
CAT	-1.14308	6.41423	18.1957	1.99e-05	8.79e-05		-0.945714	5.9367	9.35045	0.00222931	0.0104681
NFAM1	1.43459	2.06851	14.4885	0.000141019	0.000525871		6.18884	1.86553	56.7523	4.94e-14	2.27e-12
PPFIBP1	1.84842	7.96948	65.3685	6.21e-16	1.25e-14		1.28252	8.18287	14.9538	0.000110175	0.00080017
B3GNT2	1.4717	4.63416	27.5222	1.55e-07	9.9e-07		1.70788	4.70293	11.0521	0.000885877	0.0048139
LINC00886	-1.68143	1.05159	11.0779	0.000873619	0.00274014		-2.40319	1.36488	12.616	0.000382459	0.00235965
NRIP3	3.92707	3.93725	144.186	3.24e-33	5.01e-31		1.31772	4.36223	12.2055	0.000476496	0.00283727
TMEM163	2.07728	1.68975	12.9876	0.000313566	0.00108775		5.52251	1.67317	27.0799	1.95e-07	2.79e-06
SDC2	3.72335	8.25004	110.572	7.34e-26	5.25e-24		1.07981	8.74934	6.30795	0.0120198	0.0427296
CRYM	2.13456	1.82637	14.6536	0.00012919	0.000484859		5.52451	1.81073	28.4955	9.39e-08	1.43e-06
RALGPS2	-1.76526	5.83701	37.6663	8.39e-10	7.5e-09		-2.37607	5.98264	36.146	1.83e-09	3.89e-08
RNF141	-1.64983	6.2285	63.3176	1.76e-15	3.37e-14		-0.713237	5.34791	6.05479	0.0138686	0.048036
ROBO4	0.886135	3.95115	6.82633	0.00898237	0.0215722		3.80985	3.714	37.2139	1.06e-09	2.35e-08
MTRF1L	0.575548	4.68128	6.67617	0.00977105	0.0232473		0.900887	4.58382	6.01287	0.0142019	0.0488566
CARD11	2.09657	1.01841	19.2135	1.17e-05	5.36e-05		2.93866	0.934897	17.1318	3.49e-05	0.000288922
OLFML2B	5.46354	7.81979	229.117	9.29e-52	2.1e-48		4.35689	8.11657	36.2848	1.7e-09	3.65e-08
FAM198B	2.85788	7.75866	79.229	5.53e-19	1.63e-17		2.77752	7.9673	37.4805	9.23e-10	2.07e-08
CD163	4.2034	5.57668	121.903	2.42e-28	2.26e-26		8.67016	5.76785	172.76	1.85e-39	8.58e-37
BATF2	4.63471	2.58368	25.731	3.92e-07	2.35e-06		2.92547	2.82304	10.376	0.00127662	0.00658224
AARD	-3.23971	-0.287225	11.1283	0.000850207	0.00267552		-4.73822	0.421002	20.162	7.12e-06	7.1e-05
RGS1	0.961136	3.88811	9.19109	0.00243196	0.00684616		11.3914	3.67723	63.0256	2.04e-15	1.15e-13
PAPLN	1.62902	4.7118	22.9446	1.67e-06	8.94e-06		4.03738	4.69623	30.5781	3.21e-08	5.37e-07
SOGA3	2.388	2.05015	27.1202	1.91e-07	1.2e-06		1.61772	2.22043	8.2898	0.00398683	0.017094
HLA-B	1.22692	8.89053	11.1811	0.000826366	0.0026082		1.91824	8.92259	12.3629	0.000437959	0.00265313
RPS9	-1.42063	7.74591	40.7116	1.76e-10	1.73e-09		-0.846321	7.10678	7.48918	0.00620709	0.0249267
ATP9A	-0.868039	6.33974	11.6299	0.000648987	0.00209661		-1.09452	6.1997	10.5783	0.00114423	0.00601644
SMARCA2	-0.754635	7.50754	10.1671	0.00142966	0.0042507		-0.950279	7.35029	8.62514	0.00331556	0.0146399
GLA	1.35648	4.52254	32.47	1.21e-08	9.22e-08		1.33136	4.59619	11.8356	0.00058108	0.00337002
RARRES3	1.79517	3.74871	19.2648	1.14e-05	5.22e-05		2.31363	3.82507	14.036	0.000179339	0.00122334
HLA-DRB5	1.40522	4.94193	15.7185	7.35e-05	0.000289172		12.5126	4.77634	65.2844	6.48e-16	3.97e-14
CAB39L	-0.723946	3.48553	5.28677	0.0214881	0.0458401		-1.25961	3.50408	10.2513	0.00136588	0.00694822
PCDHB9	1.79563	2.0959	20.5785	5.72e-06	2.78e-05		2.49018	2.08352	12.2462	0.000466197	0.00279184
SLC7A8	1.71872	7.49829	23.1855	1.47e-06	7.98e-06		3.59199	7.56098	23.7293	1.11e-06	1.32e-05
DIO2	-2.48842	6.11859	31.8514	1.66e-08	1.24e-07		-2.19955	5.90937	14.0699	0.000176143	0.00120449
DCLK1	2.77227	6.03639	89.2952	3.4e-21	1.31e-19		2.1545	6.29243	11.6427	0.000644534	0.00367308
SLFN12L	1.10794	1.63749	7.68915	0.00555538	0.0141821		4.00082	1.34579	31.4115	2.09e-08	3.6e-07
PDHB	-0.606444	6.67781	6.98883	0.008202	0.0199388		-1.00521	6.59611	9.99008	0.00157386	0.00785099
MYO1G	1.10325	1.84831	7.05967	0.00788385	0.0192711		7.72453	1.56711	52.7337	3.82e-13	1.51e-11
ZNF683	2.07676	0.116456	7.58429	0.00588793	0.0148893		7.43929	-0.103031	25.7955	3.8e-07	5.1e-06
DLL4	1.57587	2.18702	11.5908	0.000662786	0.00213585		3.67278	2.10434	22.2825	2.35e-06	2.64e-05
CCL8	2.39649	1.97049	15.2498	9.42e-05	0.000362745		4.58742	1.99443	18.5816	1.63e-05	0.000147016
GVINP1	0.797382	3.64614	6.99379	0.00817932	0.019897		3.79928	3.31003	48.3922	3.49e-12	1.18e-10
BTN3A2	1.19851	5.01887	14.5982	0.000133039	0.000498168		0.938083	5.1016	6.00838	0.0142381	0.048971
LINC00087	-2.10854	-0.697891	11.2395	0.000800745	0.0025384		-2.65532	-1.03837	10.0638	0.00151212	0.00757239
BCOR	0.508914	6.31055	6.47447	0.0109435	0.0256823		0.765422	6.21499	6.59293	0.0102385	0.037571
FOXP2	1.01943	4.74019	14.3999	0.000147812	0.000548493		2.04861	4.5593	18.0381	2.17e-05	0.00018912
CD180	2.33443	1.32309	18.679	1.55e-05	6.94e-05		8.84815	1.20296	58.8065	1.74e-14	8.58e-13
PTPN7	1.21429	1.86148	9.59212	0.00195414	0.00562172		7.01549	1.61275	48.3771	3.52e-12	1.18e-10
SIRPB1	3.31154	2.51022	52.3869	4.56e-13	6.27e-12		5.70349	2.57726	27.2069	1.83e-07	2.63e-06
SH3TC1	0.906376	1.31251	5.89223	0.0152078	0.0340915		2.51176	1.04433	11.6908	0.000628093	0.00359531
CD84	2.33585	5.15362	52.738	3.81e-13	5.3e-12		11.3465	5.15118	252.285	8.25e-57	1.38e-53
PHC1	1.78377	3.36799	31.4205	2.08e-08	1.52e-07		1.30728	3.52041	9.70475	0.00183792	0.00895719
TMEM129	-0.691833	3.60659	6.88419	0.00869614	0.0209599		-1.71279	3.91097	14.3244	0.000153857	0.00107136
AIM2	4.69841	4.61814	117.771	1.95e-27	1.64e-25		9.11293	4.83659	139.029	4.34e-32	1.23e-29
RPL23AP53	0.786789	4.44463	6.57002	0.0103711	0.024517		1.4022	4.36904	10.5025	0.00119214	0.00622934
CLEC1A	1.22263	2.87595	8.89755	0.00285554	0.00787496		5.06474	2.72596	30.197	3.9e-08	6.43e-07
RAB23	3.63494	7.94308	112.749	2.45e-26	1.85e-24		1.12488	8.43299	6.73071	0.0094767	0.0353653
KLHL9	-0.819628	5.21564	7.68786	0.00555935	0.0141872		-1.79371	5.5669	23.7272	1.11e-06	1.33e-05
LILRA5	5.29755	-1.26045	19.0179	1.29e-05	5.9e-05		5.87793	-1.46293	13.8777	0.000195101	0.00131689
COPS8	2.21157	6.86494	41.6511	1.09e-10	1.1e-09		2.23252	7.10177	12.8593	0.000335814	0.00211079
XIRP1	4.54325	1.91378	17.9348	2.29e-05	9.98e-05		6.17469	1.84317	26.8901	2.15e-07	3.06e-06
SDS	2.47677	0.59249	20.8705	4.91e-06	2.42e-05		5.3245	0.485103	32.7787	1.03e-08	1.88e-07
AGTR1	4.55191	5.23623	122.159	2.13e-28	2e-26		3.87397	5.49794	21.2636	4e-06	4.23e-05
SLCO2B1	1.61773	5.26575	34.9867	3.32e-09	2.74e-08		12.8772	5.13472	269.322	1.59e-60	5.34e-57
RUNX2	3.91728	7.55379	89.3382	3.33e-21	1.29e-19		3.66164	7.82109	39.9242	2.64e-10	6.59e-09
LINC01133	-1.91601	2.61046	20.595	5.67e-06	2.76e-05		-2.53115	2.90642	16.7377	4.29e-05	0.000348319
MEI1	1.17421	1.14739	5.44228	0.019655	0.0424806		2.75823	1.02046	8.9164	0.00282622	0.0128246
UPK1A	-2.71096	-1.51355	8.03867	0.0045789	0.0119617		-3.78281	-1.09438	9.60295	0.00194265	0.00936662
TNIP3	1.94669	3.36383	11.6365	0.000646716	0.00209002		4.32977	3.40875	14.788	0.000120298	0.000865421
DPT	3.67094	6.62817	111.708	4.14e-26	3.1e-24		2.71519	6.88099	20.9448	4.73e-06	4.92e-05
GABRE	-2.27739	4.37064	53.1856	3.03e-13	4.28e-12		-1.52021	3.46865	10.1528	0.00144084	0.0072742
LOC728730	-1.0329	1.26461	7.01322	0.00809101	0.019714		-1.73261	1.35594	11.6861	0.000629679	0.00360192
DNAJC12	2.89868	0.157126	20.7374	5.27e-06	2.58e-05		3.63975	0.0718393	12.4512	0.000417714	0.00254431
SAMD4B	1.46493	6.86151	38.91	4.44e-10	4.14e-09		0.996168	7.05311	7.86629	0.00503649	0.0208464
CPEB1	3.14291	1.91772	35.2101	2.96e-09	2.46e-08		1.92433	2.11221	9.31321	0.00227508	0.0106591
GCNT4	-2.39061	4.55015	59.16	1.45e-14	2.46e-13		-3.05088	4.72313	42.8832	5.81e-11	1.63e-09
LINC01540	4.75832	0.62222	41.2455	1.34e-10	1.34e-09		4.54886	0.651345	28.1132	1.14e-07	1.72e-06
F2RL3	2.9279	0.843454	28.9591	7.39e-08	4.97e-07		3.69603	0.826919	14.2995	0.000155905	0.00108382
ZSCAN12P1	-1.7543	1.93419	20.3673	6.39e-06	3.09e-05		-1.32947	1.27537	7.13992	0.00753864	0.0293236
ICE2	-0.759644	6.0293	13.2785	0.000268463	0.000945604		-0.838644	5.84291	7.22574	0.00718657	0.0281855
CLUL1	-1.95905	-0.986698	5.13587	0.0234364	0.0494201		-4.66317	0.694758	19.5265	9.92e-06	9.49e-05
FAN1	-0.994636	4.13622	16.9306	3.88e-05	0.00016174		-1.01784	3.85625	9.06848	0.00260054	0.0119365
SHISA9	-7.3178	2.82554	82.6349	9.87e-20	3.17e-18		-3.9051	0.507364	13.5446	0.000232955	0.00153462
TPMT	0.860114	5.64957	13.5564	0.000231498	0.000825848		1.02807	5.63041	8.56057	0.00343522	0.0150412
PTPRG-AS1	1.88158	1.50058	19.4508	1.03e-05	4.77e-05		1.48735	1.56506	6.23484	0.0125261	0.0441759
RXRA	-1.72046	5.60634	59.7057	1.1e-14	1.9e-13		-0.915473	4.73796	6.97995	0.00824278	0.0315654
DDIT4	-1.13058	5.50286	12.6304	0.000379519	0.00128984		-1.84109	5.58822	7.4814	0.00623395	0.0250212
ZNF106	1.22398	8.64416	14.5073	0.000139615	0.000521389		1.28599	8.77241	6.50364	0.0107654	0.0391184
IFI30	2.09296	6.70201	51.9251	5.77e-13	7.79e-12		4.02361	6.72907	57.602	3.21e-14	1.52e-12
CD276	2.94545	6.75563	161.511	5.29e-37	1.17e-34		1.10759	7.15983	8.31158	0.00393931	0.0169039
ACADVL	-1.4617	7.31028	36.9157	1.23e-09	1.08e-08		-0.798115	6.50253	6.31015	0.0120048	0.0426947
LINC00547	7.46784	0.202206	50.2413	1.36e-12	1.76e-11		3.21416	0.268356	7.86743	0.00503332	0.0208436
DSG2	0.943061	7.69287	11.7275	0.000615826	0.00199983		11.7254	7.37287	262.665	4.5e-59	9.42e-56
GAS7	1.1244	7.64787	11.3293	0.000762947	0.00242666		3.62439	7.51298	34.6167	4.01e-09	7.98e-08
D2HGDH	-1.533	2.07961	21.0114	4.57e-06	2.26e-05		-1.99906	1.82565	14.9205	0.000112139	0.000812671
RPS3	-1.00164	8.57014	18.4012	1.79e-05	7.95e-05		-0.796873	8.19683	6.79049	0.00916447	0.0344461
CYTH4	2.32531	2.24787	30.5118	3.32e-08	2.36e-07		7.54495	2.21189	69.6318	7.15e-17	4.76e-15
LOC100506548	-0.978963	5.23936	20.1311	7.23e-06	3.45e-05		-1.24491	5.11328	15.592	7.86e-05	0.000595574
IL11RA	-1.78745	3.70903	15.0865	0.000102697	0.000393006		-1.78675	3.23991	15.4201	8.61e-05	0.000645589
DNMT3B	1.01575	3.67797	9.75879	0.00178467	0.0051853		1.51135	3.60238	11.8878	0.000565038	0.00328839
EPHX1	-0.751327	4.80575	9.18677	0.00243771	0.00685489		-0.817005	4.54783	6.81497	0.00903968	0.0340561
SIGLEC7	2.85946	-0.740545	10.4902	0.00120007	0.00364167		6.49925	-0.975248	22.2854	2.35e-06	2.63e-05
HECW2	2.03725	5.25491	57.2487	3.84e-14	6.13e-13		1.81477	5.40839	19.0282	1.29e-05	0.000119687
ADORA3	3.16069	2.6933	54.2464	1.77e-13	2.59e-12		8.17495	2.73549	78.5268	7.89e-19	6.35e-17
LAP3	0.918974	6.44405	10.8038	0.00101292	0.00312614		1.26096	6.45736	8.42592	0.0036991	0.0160164
CCL18	1.49627	3.2991	7.86074	0.00505197	0.0130506		10.9452	3.25306	38.9793	4.28e-10	1.02e-08
DAPK2	-3.75846	3.79121	70.3254	5.03e-17	1.17e-15		-3.42205	3.10383	42.32	7.75e-11	2.11e-09
HS6ST1	-1.00002	3.62143	8.41896	0.00371329	0.00994734		-1.11477	3.49054	6.86012	0.00881406	0.0333506
FAM225B	6.8519	0.873336	72.1558	1.99e-17	4.84e-16		4.68694	0.960706	21.9222	2.84e-06	3.1e-05
SLC7A7	1.88132	3.78896	37.8136	7.78e-10	6.99e-09		1.92704	3.898	19.4986	1.01e-05	9.61e-05
FGD2	0.945895	2.28736	6.61866	0.0100916	0.0239439		9.63415	1.94014	79.5866	4.62e-19	3.88e-17
DNM1	3.28565	4.50247	119.416	8.49e-28	7.57e-26		1.60486	4.84144	18.0815	2.12e-05	0.000185434
LINC00842	-4.99061	3.44291	93.9724	3.2e-22	1.41e-20		-2.31115	0.709712	13.9266	0.000190089	0.00128826
ANAPC16	-0.970828	5.4096	17.872	2.36e-05	0.000102832		-0.854012	5.07061	7.07738	0.0078063	0.0301653
EPHA2	-1.94074	4.00214	41.2271	1.36e-10	1.35e-09		-1.76681	3.55659	11.0062	0.000908068	0.00492648
TRIB2	1.65023	6.01043	32.6722	1.09e-08	8.38e-08		1.0105	6.24252	6.86693	0.00878055	0.0332421
PNO1	1.05183	5.05403	23.8031	1.07e-06	5.96e-06		0.943862	5.10166	9.80758	0.00173794	0.00853209
TMEM25	-2.08309	2.05189	32.0332	1.52e-08	1.14e-07		-3.47699	2.67261	53.3281	2.82e-13	1.15e-11
USP36	1.08451	6.41806	26.4174	2.75e-07	1.69e-06		1.21636	6.45384	12.8188	0.000343154	0.00214645
B3GNT7	1.18369	1.45777	10.277	0.00134701	0.0040288		3.30009	1.23893	21.9664	2.77e-06	3.04e-05
ALOX5	1.02623	2.87466	9.70312	0.00183955	0.0053302		8.0319	2.59822	82.211	1.22e-19	1.08e-17
GNL2	0.839872	6.58866	13.0453	0.000304042	0.00105829		0.947441	6.57725	8.27666	0.00401579	0.0172005
EVI2A	2.57879	4.4668	85.6933	2.1e-20	7.31e-19		4.39611	4.56473	48.2888	3.68e-12	1.23e-10
OASL	1.59246	2.45585	10.2829	0.00134266	0.00401778		4.03458	2.1263	15.2279	9.53e-05	0.000704878
LRRC58	0.487525	7.32301	5.37608	0.0204147	0.0438295		1.18786	7.13665	13.5806	0.000228534	0.00150966
SPON1	2.30181	6.5515	19.8201	8.51e-06	3.99e-05		3.39559	6.72737	19.1342	1.22e-05	0.000113928
PNPLA2	-0.869123	4.05896	8.37381	0.00380666	0.0101539		-2.13944	4.50738	33.084	8.83e-09	1.63e-07
CSF1R	1.63038	6.11341	41.3099	1.3e-10	1.3e-09		7.9386	6.00119	216.318	5.75e-49	4.81e-46
KCNJ5	1.26842	0.239247	5.23013	0.0221989	0.0470848		3.91467	-0.0698834	15.2271	9.53e-05	0.000704878
LINC01142	2.37829	-0.290551	6.09122	0.0135855	0.0309439		5.58862	-0.473691	14.4533	0.000143676	0.00100972
WIPI1	2.72124	6.63403	140.107	2.52e-32	3.68e-30		1.1943	7.01608	9.27743	0.00231995	0.010839
ACOX2	-4.11847	4.0286	43.2624	4.79e-11	5.08e-10		-2.07527	2.48552	7.23218	0.00716081	0.0281088
KRT33B	-5.34295	0.142545	14.6058	0.000132503	0.00049647		-5.32226	-2.01465	17.7547	2.51e-05	0.000215879
ZFYVE21	-0.609465	4.10976	7.43392	0.00640059	0.016009		-1.11258	4.10257	10.7447	0.00104576	0.00558474
DFNB31	1.73078	3.19824	23.8943	1.02e-06	5.7e-06		2.8495	3.21426	16.6911	4.4e-05	0.000356115
RPS18	-1.37481	6.58095	43.9465	3.37e-11	3.64e-10		-1.17459	6.12048	7.76442	0.00532855	0.0218927
RNF144A-AS1	3.80743	2.39761	38.3938	5.78e-10	5.31e-09		5.95851	2.52778	30.0748	4.16e-08	6.78e-07
TCF7	0.789527	4.66928	10.4594	0.00122029	0.00369374		1.40587	4.59094	6.21662	0.0126556	0.0445731
LOC101927181	-2.26415	1.69425	31.7686	1.74e-08	1.29e-07		-1.38678	0.737261	6.27894	0.0122181	0.0432325
PDPN	2.6791	6.86561	73.5569	9.78e-18	2.48e-16		3.59509	6.98083	33.0913	8.79e-09	1.62e-07
SKAP2	1.227	5.81407	27.7718	1.36e-07	8.78e-07		1.61606	5.81314	20.8507	4.97e-06	5.13e-05
SLC38A1	-1.38185	7.6026	27.7224	1.4e-07	8.99e-07		-2.15541	7.80778	38.3317	5.97e-10	1.38e-08
GSTM5	-2.88701	0.544164	28.6713	8.58e-08	5.71e-07		-4.80532	1.71006	43.5804	4.07e-11	1.18e-09
TSPAN11	1.47916	3.47654	10.1454	0.00144661	0.00429123		2.37647	3.4716	15.5488	8.04e-05	0.000607402
DAB1	-2.81043	0.592299	18.8892	1.39e-05	6.28e-05		-5.65547	3.20029	41.0556	1.48e-10	3.86e-09
LINC00487	4.47311	-1.53471	10.7112	0.00106491	0.00327267		5.20129	-1.78636	9.62556	0.00191888	0.00929061
LINC00601	2.79948	0.976206	11.5532	0.000676329	0.00217446		3.40693	0.981493	12.6255	0.00038053	0.00235035
PAK1IP1	0.617728	5.41312	7.63809	0.00571484	0.0145328		1.02685	5.2738	10.6435	0.00110456	0.00583725
ARHGEF4	-3.36538	4.11099	41.2956	1.31e-10	1.31e-09		-1.86514	2.5211	6.43337	0.0111996	0.0404484
HRK	4.79877	1.83146	55.3319	1.02e-13	1.54e-12		9.61316	1.93808	34.3014	4.72e-09	9.23e-08
TMEM71	2.05747	1.66799	19.9077	8.13e-06	3.83e-05		2.58549	1.65256	14.3093	0.000155098	0.00107866
PHACTR3	3.25475	2.41855	29.1658	6.64e-08	4.51e-07		4.08673	2.56711	13.4504	0.000244954	0.00160545
CLIC2	1.54994	4.32126	31.6315	1.86e-08	1.38e-07		4.93067	4.2278	42.9507	5.61e-11	1.58e-09
TNFAIP8L1	1.23836	3.02468	16.3252	5.33e-05	0.000216034		1.05539	3.08104	6.18936	0.0128521	0.0451226
TMEM158	5.13061	4.72083	164.914	9.55e-38	2.31e-35		2.68151	5.06887	19.1376	1.22e-05	0.000113838
MNDA	1.04553	3.53848	12.6343	0.00037874	0.00128767		10.9929	3.27508	116.388	3.91e-27	6.88e-25
FOSL2	0.897112	7.62694	15.3419	8.97e-05	0.000347185		1.11445	7.59336	13.8238	0.000200779	0.00135031
GZMH	1.83962	0.152714	6.75776	0.00933408	0.0223221		7.47425	-0.0593798	23.941	9.93e-07	1.2e-05
HLA-DMA	1.14125	5.43032	21.4816	3.57e-06	1.8e-05		4.38225	5.23872	93.7215	3.63e-22	4.17e-20
MSC	4.33801	4.60578	165.491	7.14e-38	1.8e-35		2.28818	4.96324	9.9975	0.00156753	0.00782175
HLA-DPA1	1.0938	8.26005	14.8461	0.00011665	0.000441086		6.5546	8.03684	128.45	8.95e-30	1.99e-27
ADCY1	3.32777	3.58031	43.5638	4.1e-11	4.4e-10		3.48906	3.77724	27.4198	1.64e-07	2.39e-06
SGCZ	3.4909	1.80035	11.0349	0.000894148	0.00279968		4.58842	1.91641	7.34626	0.00672026	0.0266484
PORCN	1.40604	4.53089	30.042	4.23e-08	2.95e-07		1.22539	4.63177	10.2604	0.00135914	0.00692448
KRT19	-4.75234	2.98904	21.6138	3.33e-06	1.68e-05		-5.73798	3.58151	39.6689	3.01e-10	7.44e-09
BHMT2	-1.26979	0.630567	7.12813	0.00758839	0.0186348		-4.06258	2.46586	54.1961	1.81e-13	7.59e-12
PLEKHA6	-2.57447	1.98903	22.4912	2.11e-06	1.11e-05		-3.21429	2.17564	25.8912	3.61e-07	4.9e-06
LOC100130872	4.29643	2.69195	31.0326	2.54e-08	1.84e-07		1.75921	3.0185	6.44318	0.0111379	0.0403056
ZSCAN18	-1.45909	2.71362	9.96193	0.00159811	0.00469676		-1.66366	2.77542	6.24233	0.0124732	0.0440327
CD86	1.7701	2.90118	21.4282	3.67e-06	1.84e-05		10.5066	2.79713	95.0115	1.89e-22	2.26e-20
FGF9	-5.63982	0.0873669	53.4978	2.59e-13	3.7e-12		-9.7528	3.39686	144.685	2.52e-33	8.25e-31
ZSCAN12	-0.900223	3.18932	6.32456	0.0119077	0.0276477		-1.3166	3.31495	7.47272	0.00626409	0.0251194
LOC648987	1.97213	3.0438	22.3841	2.23e-06	1.17e-05		1.6361	3.17558	11.2977	0.000776044	0.00429237
THSD4	-2.17764	5.19893	44.0113	3.26e-11	3.53e-10		-2.993	5.54718	44.737	2.25e-11	6.77e-10
LOC101927482	1.99507	0.899662	9.3983	0.00217186	0.00619101		6.17262	0.798477	25.8625	3.67e-07	4.95e-06
SFTPD	-1.60319	-0.440389	6.29133	0.012133	0.0281019		-2.36706	-0.295348	12.3235	0.000447298	0.00269701
LYN	1.96983	4.99053	47.6531	5.09e-12	6.14e-11		1.47264	5.19506	12.2405	0.000467624	0.00279838
NRM	1.65943	4.79231	41.8762	9.72e-11	9.9e-10		0.990176	4.99931	6.6299	0.0100281	0.0369611
C1QC	3.72905	4.89028	109.871	1.05e-25	7.28e-24		12.7894	5.04805	255.468	1.67e-57	3.1e-54
PAX6	1.36591	3.01827	8.71515	0.00315577	0.00860927		4.04782	2.97063	23.97	9.79e-07	1.19e-05
IRF1	1.00703	4.36404	10.9028	0.000960171	0.00298216		1.29975	4.34691	7.99774	0.00468359	0.0195697
FABP3	3.16207	3.97715	22.5423	2.06e-06	1.09e-05		3.17929	4.23612	13.2402	0.000274007	0.00177362
CUBN	2.8344	4.82637	85.3121	2.55e-20	8.77e-19		3.81579	4.96335	45.1763	1.8e-11	5.47e-10
CCDC34	0.772457	4.36913	9.7133	0.00182939	0.00530245		1.22847	4.28123	8.95095	0.00277325	0.0126116
CXCL3	4.4143	1.34058	14.4348	0.000145094	0.0005394		4.46063	1.45881	7.29092	0.00693041	0.0273263
EDN1	-1.36353	3.54458	10.8922	0.00096571	0.0029968		-2.03044	3.66276	23.2534	1.42e-06	1.66e-05
HAR1B	3.56683	-1.11896	9.23834	0.00237	0.00668656		4.44487	-1.34428	6.74075	0.00942348	0.0352138
TMEM65	1.08414	4.94588	26.6674	2.42e-07	1.49e-06		1.49219	4.91846	20.2009	6.97e-06	6.97e-05
SLC25A1	-0.71559	4.52894	6.99316	0.00818218	0.0199013		-1.33699	4.4994	16.5362	4.77e-05	0.0003829
LINC01426	2.65287	2.25867	14.678	0.000127526	0.000479011		2.90622	2.3978	11.458	0.000711853	0.00399814
MAGI1	-1.22172	5.41679	32.8715	9.85e-09	7.61e-08		-1.51966	5.29321	21.9857	2.75e-06	3.02e-05
LIMS1	2.0418	7.75957	79.0356	6.1e-19	1.79e-17		1.45819	7.97614	17.2807	3.22e-05	0.000269123
GXYLT2	3.86983	5.93772	144.894	2.27e-33	3.6e-31		4.25091	6.17304	40.703	1.77e-10	4.56e-09
SATB2	2.98529	5.54932	90.7666	1.62e-21	6.5e-20		2.39427	5.79535	37.1422	1.1e-09	2.43e-08
RPP25	1.19834	2.11308	7.32224	0.00681066	0.0169201		1.64766	2.07118	7.15829	0.00746182	0.0290788
GEM	3.33867	6.2565	153.47	3.02e-35	5.64e-33		1.8528	6.59456	13.3137	0.000263479	0.0017121
HINT3	-1.36577	4.66909	36.1756	1.8e-09	1.55e-08		-0.949683	4.07406	6.32259	0.0119209	0.0424861
TMEM176A	2.1689	4.99602	28.6893	8.5e-08	5.67e-07		3.25917	5.13501	15.0825	0.000102915	0.000754983
PSG10P	-2.48001	-1.66243	5.67757	0.0171832	0.0378478		-3.9872	-1.53302	13.747	0.000209154	0.00139876
OMA1	-1.22866	4.00364	23.3193	1.37e-06	7.5e-06		-0.996896	3.55678	8.01465	0.00464004	0.0194218
ABCC6	-2.5003	0.136797	18.9657	1.33e-05	6.05e-05		-2.10434	-0.571477	7.17399	0.00739681	0.0288928
ITGA7	-2.43075	2.03693	33.4712	7.23e-09	5.7e-08		-1.63014	1.09385	9.17177	0.00245776	0.011378
SLAMF8	2.78278	4.7099	63.4757	1.62e-15	3.12e-14		6.69807	4.81998	91.0511	1.4e-21	1.51e-19
SYPL2	-2.78732	3.09668	9.72815	0.00181467	0.00526485		-5.59527	4.84842	44.8454	2.13e-11	6.43e-10
KIF5C	3.32725	4.19509	39.4103	3.43e-10	3.25e-09		4.63512	4.39403	23.5578	1.21e-06	1.43e-05
RASGRP3	1.26034	4.45908	21.8409	2.96e-06	1.51e-05		2.39341	4.38462	28.3004	1.04e-07	1.58e-06
LOC100128993	3.88739	-1.23075	9.95441	0.00160465	0.00471062		5.76616	-1.47067	12.5374	0.000398877	0.00244471
VSIG4	4.62775	4.44921	102.474	4.37e-24	2.49e-22		12.3923	4.65255	197.998	5.71e-45	3.54e-42
PIK3R5	1.76315	3.15059	36.0791	1.89e-09	1.62e-08		6.79323	3.05026	86.5874	1.34e-20	1.29e-18
SYT15	-2.22757	3.20596	33.5091	7.09e-09	5.61e-08		-1.25791	2.18991	6.60392	0.0101754	0.03741
NIPAL3	-0.877994	4.85846	8.0855	0.00446209	0.01169		-2.4437	5.56242	49.6939	1.8e-12	6.33e-11
LIPE	-1.57584	0.936513	15.5293	8.12e-05	0.000316435		-1.47814	0.654456	7.12418	0.00760512	0.0295341
HCK	1.48996	3.01981	15.7717	7.15e-05	0.000281511		7.86069	2.88087	78.5938	7.63e-19	6.19e-17
MYH8	4.76466	0.831458	23.2574	1.42e-06	7.7e-06		5.84039	0.870522	18.8025	1.45e-05	0.000133015
IGSF10	1.73378	6.97259	11.252	0.00079538	0.00252272		2.86816	7.02883	9.25191	0.0023525	0.0109604
KIAA1644	5.42748	6.05367	228.871	1.05e-51	2.11e-48		3.2145	6.37384	26.2648	2.98e-07	4.1e-06
ANO10	-0.600388	4.83259	6.01506	0.0141843	0.0320834		-0.900608	4.72019	7.70839	0.00549646	0.0224832
MTAP	-1.33367	4.42242	11.5781	0.000667335	0.00214898		-1.54913	4.39793	10.7553	0.00103981	0.00555483
WAS	1.48305	1.74314	12.7173	0.000362283	0.001238		5.58168	1.52438	46.0826	1.13e-11	3.55e-10
PFDN5	-0.795009	6.93989	16.1244	5.93e-05	0.000237481		-1.01647	6.79492	13.847	0.000198313	0.00133587
HLA-DPB1	0.937871	6.80179	12.4365	0.000421021	0.00141705		4.71515	6.54096	92.0452	8.47e-22	9.32e-20
LRRC15	5.22137	9.55285	143.396	4.82e-33	7.39e-31		6.12399	9.81199	62.9236	2.15e-15	1.21e-13
CD14	2.59107	4.88806	109.316	1.38e-25	9.49e-24		5.15805	4.96756	109.036	1.59e-25	2.49e-23
GAL3ST4	0.679183	4.97355	7.19149	0.007325	0.0180419		1.3864	4.83661	11.5021	0.00069516	0.00391622
MAS1	4.16963	-1.27681	7.69585	0.00553478	0.0141357		5.53795	-1.48559	6.27963	0.0122133	0.0432325
FAM91A1	1.14035	7.20068	22.3936	2.22e-06	1.17e-05		1.11764	7.27811	8.89291	0.0028628	0.0129379
SIDT2	-0.767691	5.44754	13.856	0.00019737	0.000713947		-0.931226	5.24952	9.56128	0.00198724	0.00953488
CD33	2.6844	1.02001	23.845	1.04e-06	5.84e-06		8.56136	0.907333	57.9901	2.63e-14	1.27e-12
EPB41L4A-AS1	-1.31646	3.46558	19.8285	8.47e-06	3.97e-05		-1.50747	3.2647	10.9192	0.000951707	0.00513492
KIFAP3	1.5409	6.62676	54.193	1.82e-13	2.65e-12		1.4552	6.73752	19.5259	9.92e-06	9.49e-05
VNN2	2.09515	0.988642	7.92754	0.00486879	0.0126315		7.01117	0.884116	29.8472	4.67e-08	7.55e-07
DPYSL3	3.23126	8.19475	127.136	1.74e-29	1.85e-27		1.73136	8.55204	16.5222	4.81e-05	0.000385362
STK17B	2.21056	7.15323	84.3655	4.11e-20	1.38e-18		1.14951	7.46203	7.14229	0.0075287	0.0293053
MRVI1	-0.985571	3.68662	5.3159	0.0211316	0.0451972		-3.92848	6.02044	37.1503	1.09e-09	2.42e-08
FCGR1C	3.54235	-0.357221	18.0353	2.17e-05	9.51e-05		7.07092	-0.51089	27.9579	1.24e-07	1.85e-06
PRKAA2	-1.99885	2.00586	9.03022	0.00265552	0.00738593		-2.60978	2.48514	13.4803	0.000241079	0.00158315
CORO1A	1.17763	2.48523	12.2458	0.000466297	0.00155642		4.77112	2.2488	43.6351	3.96e-11	1.15e-09
GFPT2	3.46608	4.86603	91.3881	1.18e-21	4.86e-20		2.49629	5.16373	19.1531	1.21e-05	0.000112979
PREX1	1.40321	4.35681	30.5338	3.28e-08	2.34e-07		2.57517	4.30458	37.1159	1.11e-09	2.46e-08
NMUR2	6.94373	0.349255	21.154	4.24e-06	2.11e-05		8.13943	0.371156	9.4027	0.00216666	0.0102343
HOXB9	6.14951	2.9921	70.0335	5.83e-17	1.34e-15		9.36874	3.19995	32.6038	1.13e-08	2.04e-07
PTGER2	3.60903	2.16176	48.4679	3.36e-12	4.14e-11		2.20234	2.38022	9.38181	0.00219149	0.0103248
KRT38	-7.87537	0.328614	57.4601	3.45e-14	5.53e-13		-6.85968	-1.82094	26.8839	2.16e-07	3.07e-06
PIEZO2	4.87386	6.18288	278.37	1.7e-62	7.7e-59		1.57207	6.63396	13.7678	0.000206853	0.0013867
RCSD1	1.93475	2.97828	28.2173	1.08e-07	7.09e-07		8.32858	2.88272	102.017	5.51e-24	7.31e-22
HIST1H4E	0.830194	3.90715	10.8732	0.000975654	0.00302196		1.41226	3.80827	7.44126	0.00637454	0.0254951
OR7E47P	-4.94729	-0.19089	51.3719	7.64e-13	1.02e-11		-3.15283	-1.67399	9.25109	0.00235355	0.0109623
TRIM47	0.659565	4.29096	5.71116	0.0168574	0.0372707		2.66099	4.01157	31.598	1.9e-08	3.29e-07
ZBTB18	-0.708798	3.43566	6.96436	0.00831494	0.0201592		-1.47554	3.57367	17.7231	2.56e-05	0.000218937
MSX1	3.36363	2.80148	77.5187	1.31e-18	3.71e-17		1.20305	3.147	7.24169	0.00712301	0.0279867
DCSTAMP	3.88716	0.00612966	15.8604	6.82e-05	0.00026956		7.46457	-0.0752053	21.8002	3.03e-06	3.29e-05
VMP1	1.33111	8.38413	30.9185	2.69e-08	1.94e-07		0.971617	8.53116	7.18949	0.00733318	0.0286777
OR4F15	4.65725	-1.56992	16.1918	5.72e-05	0.000229946		5.26315	-1.82746	8.62671	0.00331269	0.0146311
HOXB4	4.2048	-0.057863	30.834	2.81e-08	2.02e-07		7.39956	-0.140735	32.386	1.26e-08	2.26e-07
FER1L6	3.67389	1.16728	24.1851	8.75e-07	4.94e-06		6.66902	1.22259	20.8229	5.04e-06	5.19e-05
GOLGA8B	-1.7676	3.92652	36.7359	1.35e-09	1.18e-08		-1.74441	3.40543	21.3115	3.9e-06	4.15e-05
GPRIN3	1.68155	4.47638	42.8859	5.8e-11	6.06e-10		7.01417	4.37626	151.781	7.07e-35	2.52e-32
GPR65	2.30572	2.65169	38.5459	5.35e-10	4.92e-09		4.83345	2.65344	42.5604	6.85e-11	1.89e-09
SKIDA1	-1.19961	1.10918	10.9886	0.000916759	0.00286157		-1.95039	1.29898	15.3219	9.07e-05	0.000676639
TBXAS1	1.58076	2.182	20.4472	6.13e-06	2.97e-05		5.04317	2.00955	48.8392	2.78e-12	9.5e-11
GUCY1B3	3.02953	5.52739	107.666	3.18e-25	2.12e-23		1.58416	5.88114	9.21984	0.00239406	0.0111262
LGI2	2.51723	3.7283	33.8898	5.83e-09	4.66e-08		4.94255	3.80676	41.8657	9.78e-11	2.62e-09
FLJ23867	-1.32727	3.3307	14.3771	0.00014961	0.000554597		-1.41807	3.04522	9.87935	0.00167144	0.00825407
TRIM16L	-0.909447	1.67787	5.66559	0.0173009	0.0380607		-1.51235	1.86837	6.68496	0.00972299	0.0360831
LEPREL1	-1.92563	4.92465	36.3311	1.66e-09	1.44e-08		-1.31248	4.23294	7.23866	0.00713503	0.0280274
TLR2	0.603467	4.39618	5.47748	0.0192631	0.0417482		3.59463	4.02226	40.0978	2.42e-10	6.06e-09
RPL22L1	-1.23792	3.17249	17.4452	2.96e-05	0.000126093		-1.51036	3.00747	13.965	0.000186249	0.00126531
SLC43A3	2.16982	7.8482	39.9445	2.61e-10	2.51e-09		3.47053	7.95622	34.0362	5.41e-09	1.05e-07
ERMP1	-2.48043	6.25482	111.95	3.66e-26	2.75e-24		-0.980392	4.81094	8.802	0.00300901	0.0135074
SSH2	0.835415	6.2492	16.0557	6.15e-05	0.000245603		1.06827	6.22063	8.54368	0.00346724	0.0151457
ADAMTS4	3.25547	4.54432	111.042	5.79e-26	4.26e-24		2.66325	4.79091	24.6618	6.83e-07	8.64e-06
TPD52L1	-3.71488	5.19112	147.452	6.25e-34	1.04e-31		-2.79369	4.01095	21.9398	2.81e-06	3.08e-05
NEDD4L	0.873709	5.919	15.7355	7.28e-05	0.00028671		1.74638	5.79925	17.7533	2.51e-05	0.000215923
CNTN4	-4.12422	1.13323	28.9817	7.31e-08	4.92e-07		-3.33078	0.327461	9.1518	0.00248474	0.0114763
TIPARP	-1.03694	5.24654	18.4461	1.75e-05	7.78e-05		-2.54297	5.88209	75.6829	3.33e-18	2.54e-16
KLHL29	-1.52473	3.19112	10.7277	0.00105546	0.00324693		-2.99687	4.06632	36.687	1.39e-09	3e-08
ZSCAN23	-2.23366	-0.0905571	9.22491	0.00238744	0.00673238		-2.37661	-0.0695756	7.00618	0.0081229	0.0311949
ERMN	2.46231	0.909896	11.7572	0.000606072	0.00197134		5.75818	0.877	21.0059	4.58e-06	4.78e-05
CLDN14	2.12511	-0.426095	9.04062	0.00264045	0.00735193		6.77544	-0.712039	24.4264	7.72e-07	9.63e-06
MAPRE2	1.228	6.74233	28.5771	9e-08	5.98e-07		0.946609	6.84715	6.78027	0.00921711	0.0346128
ST3GAL4-AS1	2.40761	1.57059	22.2583	2.38e-06	1.24e-05		1.50687	1.69934	7.04084	0.00796718	0.0306592
HERC5	1.21047	3.79904	14.145	0.000169244	0.000619636		4.39854	3.62693	40.3554	2.12e-10	5.37e-09
EPHA3	3.13069	5.45426	28.3593	1.01e-07	6.62e-07		4.59875	5.70386	17.0635	3.62e-05	0.000298003
LINC01410	0.855131	1.77383	5.92484	0.0149289	0.0335729		1.86139	1.5513	9.5868	0.00195981	0.00942866
SPHK1	3.59848	5.21016	130.958	2.53e-30	2.92e-28		1.72536	5.5636	20.2086	6.94e-06	6.95e-05
SNRPG	0.57544	3.55576	5.41955	0.0199125	0.0429449		0.978675	3.4161	6.30388	0.0120474	0.0427641
CTSK	4.08503	9.77793	160.911	7.15e-37	1.52e-34		3.45738	10.0553	30.7622	2.92e-08	4.9e-07
PSMB8	0.824483	5.38374	7.31596	0.00683448	0.0169699		1.09159	5.36057	7.91295	0.00490823	0.0203811
SNAI2	2.08268	8.85272	55.8748	7.72e-14	1.19e-12		1.63687	9.07639	12.4974	0.000407527	0.00249498
CPA4	-3.78476	5.65853	58.4166	2.12e-14	3.5e-13		-1.79582	4.19831	7.09649	0.00772351	0.0299105
COL14A1	2.53825	7.78968	25.2175	5.12e-07	3e-06		5.03237	7.95443	23.593	1.19e-06	1.41e-05
LOC643733	2.26726	2.02346	20.9526	4.71e-06	2.33e-05		5.0435	2.00948	32.1467	1.43e-08	2.54e-07
ARHGAP42	1.01812	4.83166	15.0592	0.000104191	0.000397968		2.58664	4.66617	27.8067	1.34e-07	1.99e-06
IBSP	3.71123	4.89809	6.84718	0.00887815	0.0213502		12.9167	5.17287	29.2125	6.49e-08	1.02e-06
AOX1	-1.52385	3.88638	13.8865	0.000194191	0.00070301		-2.76609	4.83811	19.0022	1.31e-05	0.00012106
DOK2	1.72876	0.902271	12.6502	0.000375531	0.00127845		6.78977	0.69445	40.7922	1.69e-10	4.37e-09
HSPB7	-2.38459	0.215571	8.16336	0.00427451	0.0112608		-8.65229	5.00583	173.39	1.34e-39	6.43e-37
FAM49A	1.11106	4.06189	15.5358	8.1e-05	0.000315753		4.81001	3.82118	62.46	2.72e-15	1.51e-13
FCRLA	-1.95879	0.219609	11.1388	0.000845399	0.00266271		-2.15359	-0.0237746	8.022	0.00462126	0.0193528
NCKAP1L	1.93497	4.78223	61.7928	3.82e-15	6.96e-14		12.4777	4.7381	219.821	9.89e-50	9.19e-47
HCST	1.6515	1.11338	12.4147	0.00042597	0.00143264		2.80869	0.972485	17.7163	2.56e-05	0.000219601
LMNTD2	-3.08254	-0.462607	24.924	5.96e-07	3.47e-06		-2.69258	-1.61264	6.27403	0.012252	0.0433341
CD300A	1.56293	1.51121	15.1435	9.96e-05	0.0003822		5.86074	1.30623	41.0145	1.51e-10	3.94e-09
ASPN	1.70613	7.08931	5.82639	0.0157875	0.0352324		4.02008	7.35885	10.3601	0.0012877	0.00663018
SLC1A1	-1.7164	2.31353	9.35184	0.00222762	0.00633001		-2.51144	2.85432	14.9511	0.000110333	0.000800617
SLC12A8	1.37403	3.54831	19.0318	1.29e-05	5.86e-05		1.65832	3.59824	11.985	0.000536302	0.00314523
LOC100129434	-1.37131	0.281137	6.37068	0.0116021	0.0270214		-2.22543	0.521773	12.4504	0.000417908	0.00254457
MRC1	3.77785	4.06507	84.7686	3.35e-20	1.14e-18		11.9312	4.19802	136.281	1.73e-31	4.6e-29
SIRPB2	2.06414	1.75838	30.9965	2.58e-08	1.87e-07		7.81048	1.65574	63.4514	1.64e-15	9.32e-14
FCAR	5.42956	-0.0165986	32.8311	1.01e-08	7.75e-08		7.58266	-0.0595909	22.1547	2.52e-06	2.79e-05
RARG	-1.13602	5.2859	20.4608	6.09e-06	2.95e-05		-1.41397	5.14765	19.4665	1.02e-05	9.77e-05
IGSF21	2.09203	1.55707	11.6294	0.00064919	0.00209689		6.81939	1.42172	50.3282	1.3e-12	4.73e-11
ABCA5	-1.6217	4.78541	18.0317	2.17e-05	9.52e-05		-1.17609	4.21313	6.66627	0.00982544	0.0363907
GPR34	1.51322	2.97774	16.7871	4.18e-05	0.000173449		6.70382	2.83078	71.3492	2.99e-17	2.07e-15
ARGLU1	-1.20833	5.0909	20.4362	6.17e-06	2.99e-05		-1.82154	5.15956	28.6893	8.5e-08	1.3e-06
CREM	1.1717	4.46526	22.9837	1.63e-06	8.77e-06		1.16595	4.5201	10.0831	0.00149634	0.00750907
IGDCC4	3.15909	4.58896	38.4536	5.61e-10	5.15e-09		1.92402	4.90205	8.92366	0.00281499	0.0127806
BCAM	-1.95973	2.50851	28.2265	1.08e-07	7.05e-07		-2.23618	2.19519	13.8496	0.000198034	0.00133453
CD163L1	1.99143	3.20455	28.0391	1.19e-07	7.72e-07		3.07655	3.24579	23.7118	1.12e-06	1.33e-05
NR2F6	-0.993614	4.24591	15.2725	9.31e-05	0.00035887		-1.27862	4.09716	10.9071	0.000957966	0.00516369
CDH23	2.12968	4.50837	9.55843	0.00199034	0.00571858		6.41871	4.64304	31.8893	1.63e-08	2.87e-07
GPT2	-3.55794	5.72232	144.794	2.38e-33	3.75e-31		-2.0064	3.73704	15.9132	6.63e-05	0.000513496
CDK10	-0.707647	3.44976	7.45682	0.00631965	0.0158284		-1.35953	3.52282	14.2677	0.000158564	0.00110093
CHST11	2.18701	5.69106	54.1108	1.89e-13	2.76e-12		1.72032	5.89841	15.31	9.12e-05	0.000680316
MED4	-0.89606	3.99689	11.8816	0.000566919	0.00185533		-1.04537	3.81068	9.57816	0.00196905	0.00945304
SNRNP70	-0.548825	4.73335	5.30631	0.0212483	0.0453876		-1.4118	4.89805	14.1907	0.000165187	0.00113935
DOCK8	0.499803	4.8276	5.13942	0.0233884	0.0493305		5.60245	4.37985	124.372	6.98e-29	1.48e-26
SELL	1.26543	2.58516	7.6057	0.0058184	0.0147425		6.01783	2.26598	40.8797	1.62e-10	4.2e-09
STON2	0.929582	8.01234	6.75337	0.00935708	0.0223624		7.659	7.79298	92.6138	6.36e-22	7.09e-20
WDR75	0.482827	6.25112	5.49089	0.0191158	0.0414738		0.891549	6.1061	9.20623	0.00241192	0.0111936
LINC00936	2.23214	2.08708	33.8341	6e-09	4.79e-08		1.82042	2.21065	8.86995	0.00289903	0.0130804
CCL5	2.05222	4.26776	23.4429	1.29e-06	7.07e-06		7.58072	4.21548	60.0716	9.15e-15	4.71e-13
ROBO1	1.27854	8.40582	23.494	1.25e-06	6.9e-06		1.64927	8.44612	17.0617	3.62e-05	0.000298138
SHANK2	-2.3154	2.8578	18.8746	1.4e-05	6.33e-05		-2.09782	2.39672	9.78616	0.00175831	0.00861942
GABRB2	3.20362	3.05318	9.55935	0.00198934	0.00571754		6.87369	3.22694	18.2844	1.9e-05	0.00016882
ADHFE1	-3.03954	2.25406	61.6422	4.12e-15	7.49e-14		-2.06483	0.936257	16.6978	4.38e-05	0.000355125
CD8A	1.40788	2.79479	7.03046	0.00801347	0.0195514		8.78238	2.62816	45.5005	1.53e-11	4.69e-10
CCNG1	-0.714867	5.99449	10.3394	0.00130221	0.00390966		-1.4724	6.15456	23.0947	1.54e-06	1.79e-05
KLHL6	1.28994	2.37695	12.0243	0.000525119	0.00173199		8.1762	2.13725	75.8651	3.04e-18	2.33e-16
PRKAG2	-0.871807	3.72876	9.84514	0.00170281	0.00497138		-1.39684	3.77663	13.552	0.000232042	0.00152921
C1QA	3.51229	2.63959	58.9186	1.64e-14	2.75e-13		10.4449	2.73151	103.448	2.67e-24	3.66e-22
GHITM	-0.881108	6.40547	12.9787	0.000315054	0.00109235		-1.11376	6.26948	9.88382	0.00166738	0.00824229
CLK1	-0.945574	5.71096	15.7855	7.09e-05	0.000279523		-1.14352	5.55205	13.0031	0.00031098	0.00197549
ADAMTS14	4.77473	3.67083	131.366	2.06e-30	2.42e-28		1.93816	4.03736	10.543	0.00116627	0.00611124
ASS1	-1.53703	4.90183	11.7661	0.000603206	0.00196272		-2.93304	5.76096	27.7912	1.35e-07	2e-06
HLA-DMB	1.30719	3.93407	17.2785	3.23e-05	0.000136495		9.1195	3.7441	129.71	4.74e-30	1.1e-27
FIBIN	4.23912	5.44373	76.7555	1.93e-18	5.27e-17		2.05999	5.82819	8.90359	0.0028461	0.0128889
CLIC3	-2.0662	1.64119	24.7257	6.61e-07	3.82e-06		-2.41911	1.63951	13.0284	0.000306796	0.00195187
WT1-AS	4.94536	-1.25866	11.8079	0.000589787	0.00192321		5.71388	-1.46212	7.90804	0.00492155	0.0204313
MAP3K2	0.49171	7.91376	5.32563	0.021014	0.0449723		0.84821	7.78944	6.66001	0.00986001	0.0364945
IL2RA	2.63236	2.77185	42.1753	8.34e-11	8.55e-10		7.4252	2.80963	61.1075	5.4e-15	2.85e-13
METTL24	-3.13833	-0.690082	9.15453	0.00248104	0.00695728		-4.71995	0.769461	27.9378	1.25e-07	1.87e-06
SOD2	1.21356	7.83985	10.7504	0.00104259	0.00321278		1.77358	7.84875	11.1902	0.000822301	0.00450944
RUNX3	0.921139	4.49931	8.10818	0.00440659	0.01156		3.37653	4.2857	36.2878	1.7e-09	3.65e-08
SELENBP1	-2.77688	2.89451	19.5022	1e-05	4.65e-05		-3.06249	3.22271	19.7469	8.84e-06	8.6e-05
CRTAM	1.68398	0.977734	8.41488	0.00372161	0.00996523		4.38386	0.750129	23.1327	1.51e-06	1.76e-05
BTK	1.02052	1.78524	7.53477	0.00605195	0.015255		7.57165	1.42929	63.8148	1.37e-15	7.97e-14
SIGLEC10	1.80082	1.3564	12.755	0.000355053	0.00121536		7.29943	1.19484	43.5241	4.19e-11	1.21e-09
SMAD9	-1.04933	2.80514	9.81839	0.00172776	0.00503527		-3.20854	4.10918	50.2473	1.36e-12	4.92e-11
RGPD3	1.83544	0.296935	11.2996	0.000775234	0.00246184		2.38858	0.210108	10.2759	0.00134776	0.00687905
MEST	-1.15279	4.35183	8.38327	0.00378691	0.0101131		-1.85036	4.97884	6.0867	0.0136203	0.0472839
TMEM133	0.908918	3.45437	8.20324	0.00418157	0.01104		2.39487	3.25627	18.4709	1.73e-05	0.000154969
PM20D2	-2.54279	4.45946	74.5218	6e-18	1.55e-16		-1.54637	3.44485	12.5399	0.000398345	0.00244235
PDE5A	-1.15013	4.36315	16.0825	6.06e-05	0.000242479		-3.74748	5.93721	123.993	8.45e-29	1.75e-26
AMPH	6.02213	5.7883	181.459	2.33e-41	9.8e-39		3.24989	6.11449	33.0454	9e-09	1.66e-07
SFRP4	4.24245	6.01954	13.7425	0.000209653	0.000754609		4.59362	6.317	9.29358	0.00229958	0.0107649
WISP2	2.54643	5.39792	16.7779	4.2e-05	0.000174172		6.12201	5.57762	31.3889	2.11e-08	3.63e-07
LINC01436	4.8032	2.29139	29.0181	7.17e-08	4.84e-07		6.79106	2.43631	29.1913	6.56e-08	1.03e-06
KCTD12	1.08985	8.39507	20.1953	6.99e-06	3.34e-05		1.48325	8.38407	10.0777	0.00150072	0.00752498
TMEM55A	1.67851	4.67966	46.8831	7.53e-12	8.93e-11		0.999075	4.89382	8.63132	0.00330433	0.014598
SERPINI1	1.27534	2.07926	12.2527	0.00046458	0.00155134		2.24205	1.98486	11.6809	0.000631435	0.00360949
HSPB6	-2.45637	0.323323	15.7154	7.36e-05	0.000289457		-6.7542	3.91121	124.174	7.72e-29	1.61e-26
LINC01450	2.11803	-0.48572	5.92221	0.0149512	0.0336105		3.10439	-0.698438	8.01756	0.0046326	0.0193954
ELL2	-1.1554	7.45341	27.1666	1.87e-07	1.18e-06		-2.01854	7.70236	37.2359	1.05e-09	2.33e-08
RIPK2	1.58269	5.55983	42.9699	5.56e-11	5.82e-10		1.20364	5.72702	12.5909	0.000387634	0.00238805
PARVG	1.33714	2.50286	13.9397	0.000188769	0.000685299		9.98625	2.28462	85.1943	2.7e-20	2.57e-18
LAIR1	3.09846	3.14064	36.2175	1.76e-09	1.52e-08		10.9272	3.20394	122.022	2.28e-28	4.49e-26
CREG2	2.10413	0.375257	10.4024	0.0012585	0.00379288		7.82098	0.191806	26.7329	2.34e-07	3.29e-06
TRIM55	-6.96908	2.88003	130.315	3.5e-30	3.96e-28		-4.73996	0.861006	22.938	1.67e-06	1.93e-05
RASGRF2	1.2328	4.34478	10.3172	0.00131796	0.00395106		2.52295	4.33266	17.4265	2.99e-05	0.000251256
MS4A4A	3.75731	3.65814	54.7961	1.34e-13	1.98e-12		9.94253	3.76282	158.523	2.38e-36	9.25e-34
SASH3	1.56377	2.76096	18.8685	1.4e-05	6.34e-05		10.2935	2.58572	97.5499	5.25e-23	6.41e-21
SLA	1.23249	3.92256	17.0426	3.66e-05	0.000153291		6.42833	3.69665	88.5079	5.06e-21	5.1e-19
HOXA4	1.31307	1.2256	9.9546	0.00160448	0.00471062		2.7246	1.03768	11.1531	0.000838931	0.00459161
SAP130	0.815924	6.35361	14.258	0.000159381	0.00058745		1.04462	6.33802	7.00961	0.00810733	0.0311517
KCNS1	-2.813	0.693629	28.3545	1.01e-07	6.64e-07		-2.5883	0.211292	14.4303	0.000145442	0.00101956
IL16	0.759353	4.93332	6.18567	0.0128789	0.0295802		4.02239	4.68986	38.9469	4.35e-10	1.04e-08
ANXA2R	1.08259	1.81159	5.77902	0.0162185	0.0360388		1.59709	1.75575	6.19792	0.0127901	0.0449709
ARHGDIB	0.552729	6.82034	5.42011	0.0199061	0.0429362		4.88986	6.39028	134.297	4.71e-31	1.17e-28
GRTP1	-3.6621	2.07159	63.6723	1.47e-15	2.84e-14		-1.94678	0.549988	9.94651	0.00161155	0.0080008
CADPS2	1.33461	4.66147	8.2682	0.00403455	0.0106909		2.26113	4.67798	11.9207	0.000555128	0.00324063
LINC00702	3.51837	0.766992	30.4916	3.35e-08	2.38e-07		2.53467	0.847329	12.7812	0.000350128	0.00218272
C1QB	3.65629	4.1102	69.9586	6.06e-17	1.39e-15		11.9938	4.25961	175.526	4.6e-40	2.4e-37
FXYD1	-3.14365	-1.33019	7.87757	0.00500516	0.0129445		-3.59417	-0.947931	11.5123	0.000691365	0.00389615
TMEM80	-1.03288	3.21822	10.5138	0.00118484	0.00360089		-1.23658	3.02111	9.28647	0.00230853	0.0107946
FLJ46284	3.82415	-1.25173	9.402	0.00216748	0.0061824		4.07899	-1.45933	6.43403	0.0111954	0.0404484
LCP2	2.17424	5.00767	52.2568	4.87e-13	6.67e-12		12.7468	5.00514	191.969	1.18e-43	7.06e-41
PPP1R9A	-3.76464	1.70397	27.3972	1.66e-07	1.05e-06		-3.64618	1.0086	31.8587	1.66e-08	2.9e-07
LRP5	-1.20373	3.59185	14.2769	0.000157792	0.00058254		-1.78636	3.63655	10.634	0.0011103	0.00585831
HLA-DRB6	1.19038	2.63142	9.14214	0.00249789	0.00699835		10.0983	2.39513	49.0692	2.47e-12	8.49e-11
ZNF730	-3.38821	0.947538	38.8429	4.59e-10	4.27e-09		-2.14961	-0.437018	6.9616	0.00832775	0.0318086
SNX2	1.27362	7.51679	20.6251	5.59e-06	2.72e-05		1.35375	7.62854	8.6596	0.00325343	0.0144083
SLC10A4	2.99618	0.622577	14.6572	0.000128943	0.00048403		5.47972	0.588627	17.6401	2.67e-05	0.000227535
CHRNA1	1.67825	1.79174	11.1885	0.000823053	0.00260001		7.83086	1.71945	24.2553	8.44e-07	1.04e-05
KRT8	-4.1782	1.65308	25.6267	4.14e-07	2.47e-06		-3.79708	0.252369	15.4056	8.67e-05	0.000649942
RGS2	1.0708	4.93223	9.65969	0.00188355	0.00544461		1.96388	4.86771	15.2583	9.38e-05	0.000696078
GPR84	1.82881	1.12125	13.6847	0.000216211	0.000775593		6.42899	0.991088	33.2174	8.24e-09	1.53e-07
RAB4A	-0.665209	4.35311	9.2663	0.00233409	0.00659632		-0.853869	4.19184	6.53189	0.0105957	0.0386193
SCG2	5.96264	4.96976	39.3435	3.55e-10	3.35e-09		7.72344	5.23379	35.871	2.11e-09	4.42e-08
GNLY	1.48708	1.50264	8.33943	0.00387937	0.0103327		7.1865	1.29018	34.0872	5.27e-09	1.02e-07
PTPRQ	-4.71428	2.06406	69.044	9.63e-17	2.16e-15		-5.13996	1.91771	45.4471	1.57e-11	4.8e-10
SPATA6	0.668879	4.17724	5.59108	0.0180522	0.0394641		1.47955	4.04738	10.0868	0.00149337	0.00749868
CR1	2.81657	1.28283	25.709	3.97e-07	2.37e-06		8.96455	1.25846	52.5265	4.24e-13	1.68e-11
AADACL2-AS1	1.49301	2.96585	5.89215	0.0152085	0.0340915		8.9815	2.79655	50.1502	1.42e-12	5.16e-11
TYROBP	2.57145	4.83853	75.8886	3e-18	8.02e-17		11.0936	4.89359	211.014	8.25e-48	6.27e-45
TIE1	1.01638	3.02751	9.73701	0.00180595	0.00524289		3.20833	2.83119	11.723	0.000617331	0.00354584
LOC101929517	2.17881	-0.961071	6.81011	0.00906434	0.0217402		6.22349	-1.24621	14.252	0.000159887	0.00110874
PEG3	-2.84749	1.78271	32.4641	1.21e-08	9.24e-08		-2.36615	1.35607	9.22308	0.00238983	0.0111096
HSPA2	-0.935605	4.6621	7.81007	0.00519558	0.0133815		-2.48597	5.38834	40.0049	2.53e-10	6.33e-09
FAM189A1	4.85771	1.19863	27.5118	1.56e-07	9.94e-07		5.64257	1.29065	12.5961	0.000386555	0.00238228
ITGAV	1.57929	8.9565	38.5924	5.22e-10	4.82e-09		1.01408	9.17076	7.31465	0.00683949	0.027006
KIF25	4.33917	0.0946309	13.6007	0.000226106	0.000808046		3.59041	0.0775792	9.28677	0.00230815	0.0107946
MEFV	2.3115	-0.169425	7.16218	0.00744566	0.0183216		7.19117	-0.396709	16.4489	5e-05	0.000399213
HCLS1	1.67873	3.57511	32.843	9.99e-09	7.71e-08		3.82678	3.50465	56.4175	5.86e-14	2.66e-12
PARP12	0.649104	4.87831	5.98343	0.0144409	0.0325969		1.62692	4.66114	18.9292	1.36e-05	0.00012536
IGSF6	1.47346	3.88327	25.6688	4.05e-07	2.42e-06		4.65872	3.76036	54.2447	1.77e-13	7.42e-12
KLRD1	2.34947	1.17812	19.6411	9.34e-06	4.35e-05		3.74978	1.09155	18.8834	1.39e-05	0.000127981
CYP1B1	-1.59069	6.17825	15.0866	0.00010269	0.000393006		-2.87876	7.21274	13.4506	0.000244922	0.00160545
MECOM	1.36618	4.58151	7.82671	0.00514797	0.0132702		2.53747	4.58039	18.3884	1.8e-05	0.000161131
KRT34	-3.90764	1.46746	48.4394	3.41e-12	4.19e-11		-7.6315	3.87003	63.529	1.58e-15	9.05e-14
MINK1	-0.771094	5.3034	11.3233	0.000765402	0.00243404		-0.84156	5.065	6.91278	0.00855819	0.0325392
EPHA4	-2.83193	5.88199	73.4228	1.05e-17	2.63e-16		-1.71745	4.68025	13.491	0.000239704	0.00157536
LOC101928767	3.4756	1.1786	32.9036	9.68e-09	7.5e-08		8.82429	1.16728	52.3102	4.74e-13	1.86e-11
PGRMC2	-0.698993	7.12565	7.29878	0.00690016	0.0171161		-1.17187	7.10605	14.2489	0.000160151	0.00110965
LOC100506159	4.57431	-0.615471	7.93949	0.00483675	0.0125538		6.65178	-0.741951	13.578	0.000228852	0.00151116
CXorf21	1.33682	1.34439	8.87217	0.00289551	0.00797014		8.72182	1.06346	49.8058	1.7e-12	6.05e-11
LAPTM5	2.40757	6.88641	86.3914	1.48e-20	5.22e-19		6.88713	6.94059	158.734	2.14e-36	8.52e-34
SNHG5	-0.750109	5.27185	12.1713	0.000485305	0.00161302		-1.03341	5.14893	11.0032	0.00090955	0.00493292
WDR35	1.02745	5.72855	20.6722	5.45e-06	2.66e-05		1.07728	5.75413	8.92806	0.00280823	0.0127533
CTSS	2.16363	6.44879	68.8983	1.04e-16	2.3e-15		5.71826	6.46015	143.625	4.29e-33	1.3e-30
DDR1	-3.58176	5.38281	134.095	5.21e-31	6.59e-29		-1.40805	3.29396	7.29722	0.00690612	0.0272369
FRMD5	1.67	2.84551	13.6392	0.000221517	0.000793209		1.90681	2.93049	8.47637	0.00359789	0.015647
SAT1	0.75717	6.68205	8.7221	0.00314375	0.00858037		2.52014	6.44011	42.3647	7.57e-11	2.07e-09
CNTN3	-3.98564	0.54978	19.3774	1.07e-05	4.94e-05		-6.43704	4.1071	36.4673	1.55e-09	3.34e-08
ST8SIA6	2.08533	3.61867	9.40422	0.00216487	0.0061769		9.56203	3.69814	38.9564	4.33e-10	1.03e-08
STRIP2	2.49954	3.89792	52.0086	5.53e-13	7.49e-12		2.9775	4.01954	25.6069	4.19e-07	5.57e-06
CRHR1-IT1	-3.02918	1.5791	41.8356	9.93e-11	1.01e-09		-2.46385	0.980439	10.5052	0.00119042	0.00622412
LINC01050	5.8385	1.8229	77.0356	1.68e-18	4.61e-17		5.83303	1.96237	37.5608	8.86e-10	1.99e-08
SELO	-0.725706	2.58796	6.25519	0.012383	0.0286228		-1.17584	2.53545	6.83668	0.00893045	0.0337332
LOC392232	3.91682	1.05883	40.3525	2.12e-10	2.06e-09		5.49084	1.11341	25.4971	4.43e-07	5.85e-06
TMEM51	0.77207	4.34707	9.32325	0.00226265	0.00641343		2.85079	4.0622	39.1451	3.93e-10	9.47e-09
C1orf162	1.48614	3.28451	18.7561	1.49e-05	6.69e-05		6.06569	3.17439	60.3936	7.77e-15	4.03e-13
TEX11	3.79901	-0.939422	12.0479	0.000518518	0.00171363		6.30602	-1.1255	12.4472	0.000418611	0.00254792
PDGFRL	4.04327	4.97608	98.0637	4.05e-23	1.97e-21		2.6752	5.27866	15.1996	9.67e-05	0.000714264
LBX2-AS1	2.69142	2.50231	31.2865	2.23e-08	1.62e-07		2.28627	2.68391	10.8927	0.000965442	0.00520231
B4GALNT4	-1.99123	-0.104653	5.51883	0.0188129	0.0409224		-2.87243	0.169107	9.08698	0.00257435	0.0118348
FOXRED2	0.802355	5.37631	9.09536	0.00256259	0.00716045		1.24516	5.33074	8.46978	0.00361096	0.0156834
GRIA1	-4.22274	0.160002	18.7818	1.47e-05	6.61e-05		-9.19581	4.30157	263.478	2.99e-59	7.16e-56
LOC101929452	2.77206	0.28824	24.8773	6.11e-07	3.54e-06		7.79067	0.166292	37.6869	8.31e-10	1.88e-08
LOC100505812	1.05061	1.38059	5.64594	0.0174958	0.0384148		2.68074	1.09491	17.4646	2.93e-05	0.000247012
GNA13	1.22695	7.38889	32.6687	1.09e-08	8.39e-08		0.865743	7.51729	8.32986	0.00389987	0.0167555
MICU3	-1.32206	1.79234	6.44672	0.0111157	0.0260277		-2.34324	2.22972	15.0691	0.000103648	0.000759024
SLA2	1.209	0.823882	7.61488	0.00578886	0.0146859		3.5127	0.573162	18.7658	1.48e-05	0.000135153
SPHKAP	-6.44721	-0.0936274	24.2697	8.37e-07	4.74e-06		-4.73211	-1.88861	10.108	0.00147627	0.00742618
HSD3B7	1.81472	5.02413	16.5267	4.8e-05	0.000196		1.52163	5.27692	6.15827	0.0130799	0.0457782
IDS	1.25495	8.12154	25.3189	4.86e-07	2.86e-06		0.967658	8.25943	6.39643	0.011435	0.0410521
TINAGL1	-2.10049	1.81574	31.1258	2.42e-08	1.76e-07		-3.98788	2.89351	55.7139	8.38e-14	3.65e-12
ST6GAL2	3.56733	5.12323	22.4946	2.11e-06	1.11e-05		9.92238	5.26541	51.4377	7.39e-13	2.82e-11
VGLL4	0.667276	5.01949	8.5384	0.00347732	0.00938187		0.954489	4.94761	6.7919	0.00915723	0.0344266
ZNF438	1.82874	4.71614	54.2322	1.78e-13	2.61e-12		2.00098	4.81792	24.7641	6.48e-07	8.25e-06
LINC01429	4.48896	-0.590442	16.6707	4.45e-05	0.000183076		6.65597	-0.725318	13.1144	0.000293031	0.00187571
LINC00174	1.53976	4.71882	13.2555	0.000271782	0.000955609		3.96432	4.6744	35.7969	2.19e-09	4.57e-08
FOXP1	1.6761	7.67936	50.8041	1.02e-12	1.34e-11		1.53222	7.81569	15.7727	7.14e-05	0.000548254
CH25H	2.25455	3.97407	43.0059	5.46e-11	5.72e-10		2.08163	4.14408	16.7716	4.22e-05	0.000342982
PDP2	-0.679289	3.9482	6.17006	0.012993	0.0298044		-0.842251	3.74516	6.37231	0.0115915	0.0414981
FAM20A	2.34295	5.22088	59.8681	1.01e-14	1.76e-13		1.38231	5.5324	7.51615	0.00611483	0.0245975
ARHGAP4	1.05281	1.77631	7.80489	0.0052105	0.0134123		4.69672	1.48009	38.1203	6.65e-10	1.53e-08
KCNQ3	1.91178	2.98338	23.0099	1.61e-06	8.66e-06		2.05619	3.10491	9.04022	0.00264104	0.0120727
LOC100288911	-2.24243	-0.0365998	16.2751	5.48e-05	0.00022128		-4.04686	0.739004	37.0328	1.16e-09	2.55e-08
ST3GAL6-AS1	1.61198	0.070275	5.95349	0.0146882	0.0330933		7.33324	-0.184506	25.8179	3.75e-07	5.06e-06
FAM161A	1.7711	3.48213	28.7997	8.03e-08	5.37e-07		2.39823	3.5338	21.0614	4.45e-06	4.66e-05
NRG1	-1.20475	4.22163	8.97435	0.00273796	0.00758955		-1.58514	4.3208	8.93454	0.00279827	0.0127173
RIC1	-0.727389	5.77514	12.5993	0.000385894	0.00130978		-1.93154	6.20998	43.2544	4.81e-11	1.36e-09
PDCD4-AS1	1.23486	1.22539	5.20329	0.0225441	0.0477556		1.86062	1.16475	6.43881	0.0111654	0.0403664
CRLF1	-2.1849	0.563279	15.0633	0.000103963	0.000397345		-3.78752	1.33935	34.7777	3.7e-09	7.41e-08
TEX15	3.97367	1.81787	17.1341	3.48e-05	0.000146655		5.94091	1.93916	15.4207	8.6e-05	0.000645589
ITIH5	-1.39103	3.12805	15.1801	9.77e-05	0.000375427		-3.79052	4.65455	53.135	3.11e-13	1.27e-11
CD3E	1.08947	2.75585	5.26037	0.0218163	0.0464312		10.1359	2.44122	76.4396	2.27e-18	1.77e-16
SH3GLB2	-1.49176	3.84608	30.2092	3.88e-08	2.73e-07		-1.22377	3.25658	6.14563	0.0131737	0.046068
CTSW	1.49747	2.06223	9.70064	0.00184204	0.00533569		4.99354	1.93816	22.4624	2.14e-06	2.43e-05
ROBO2	-1.96334	3.02814	7.79232	0.00524688	0.0134906		-2.86377	4.18708	11.3356	0.000760367	0.00423077
MIB2	-0.873944	2.10466	6.21665	0.0126554	0.0291371		-2.29635	2.38534	11.3266	0.000764046	0.00424284
COMMD6	-0.86464	3.93656	10.3753	0.00127709	0.00384061		-1.29643	3.9065	8.76619	0.00306865	0.0137163
RPL27A	-0.615516	6.09885	8.62768	0.00331093	0.00897709		-0.98152	6.04214	7.86679	0.00503511	0.0208458
ATP2B4	-0.535515	8.47299	5.45225	0.0195431	0.0422742		-2.09485	9.12967	48.2321	3.79e-12	1.26e-10
TRPM2	1.78739	1.32057	17.343	3.12e-05	0.000132438		7.144	1.14914	49.9831	1.55e-12	5.57e-11
SGMS1	-1.11461	5.73415	21.0401	4.5e-06	2.23e-05		-1.08927	5.46296	10.0047	0.00156145	0.00779374
SP110	0.699841	5.53147	7.14614	0.00751253	0.0184686		0.974736	5.45975	8.02852	0.00460464	0.0192929
MOSPD1	-0.648614	4.21443	7.39253	0.00654954	0.0163432		-0.984258	4.11251	7.95647	0.00479157	0.0199512
TMEM244	5.02403	0.435447	31.8819	1.64e-08	1.23e-07		6.52973	0.435244	27.866	1.3e-07	1.93e-06
ID1	-1.92057	4.03924	47.8758	4.54e-12	5.52e-11		-2.72343	4.22143	25.465	4.5e-07	5.94e-06
FAM216B	5.74115	1.91197	94.1818	2.88e-22	1.27e-20		7.47491	2.04503	52.8158	3.66e-13	1.46e-11
C16orf47	4.69661	-0.313849	18.1511	2.04e-05	8.98e-05		3.77953	-0.386134	12.2443	0.000466675	0.0027937
GJA4	1.22363	1.98888	7.11654	0.0076376	0.0187506		7.71103	1.7161	55.281	1.04e-13	4.5e-12
CD3G	1.16336	2.56094	6.5688	0.0103782	0.0245306		9.96116	2.27936	68.2078	1.47e-16	9.5e-15
PTPRO	2.27753	1.43909	23.8672	1.03e-06	5.78e-06		2.9776	1.40092	22.5064	2.09e-06	2.38e-05
HTR2A	4.14476	3.27793	67.908	1.71e-16	3.69e-15		3.1819	3.5105	13.051	0.000303116	0.00193213
TSPO	-0.749051	5.52302	11.5758	0.000668172	0.00215091		-1.35792	5.58595	14.3698	0.000150195	0.00104804
STAB1	2.55956	5.01522	73.01	1.29e-17	3.21e-16		7.23779	5.07968	131.029	2.44e-30	5.91e-28
LILRA6	3.63249	1.48641	47.2333	6.3e-12	7.54e-11		6.4889	1.52341	43.9205	3.42e-11	1e-09
ID4	-3.41363	3.76917	71.1668	3.28e-17	7.81e-16		-3.18737	3.04266	44.9273	2.04e-11	6.2e-10
RASL11A	-1.99527	0.854289	19.8005	8.6e-06	4.03e-05		-3.86933	1.89719	52.0153	5.51e-13	2.15e-11
RPL22	-0.849292	6.99475	18.0477	2.15e-05	9.46e-05		-0.683986	6.65539	6.30631	0.0120309	0.0427453
FHAD1	5.0204	3.79366	137.924	7.57e-32	1.06e-29		7.71361	3.99354	83.9381	5.11e-20	4.64e-18
SLC48A1	-1.41969	4.41058	29.5977	5.32e-08	3.67e-07		-1.51036	4.18015	17.3892	3.05e-05	0.000255716
AFAP1L1	1.17786	3.78838	18.5026	1.7e-05	7.57e-05		1.66243	3.7476	16.6479	4.5e-05	0.000363594
SPON2	3.54594	5.60105	79.5308	4.75e-19	1.41e-17		3.10807	5.87825	22.9219	1.69e-06	1.95e-05
RGN	-2.36516	-0.242292	9.77243	0.00177148	0.0051511		-4.04742	1.12373	27.1769	1.86e-07	2.67e-06
NBPF15	1.2729	3.76415	22.3757	2.24e-06	1.17e-05		1.08462	3.8608	6.5495	0.0104913	0.038314
PAMR1	-2.42443	2.71251	12.0462	0.000518974	0.00171452		-5.38938	5.20276	51.4242	7.44e-13	2.82e-11
GTF2H2C	1.16999	0.0969346	6.36199	0.0116591	0.0271261		2.05524	-0.117306	8.18275	0.00422906	0.0179851
IL21R	1.20914	1.11476	7.2798	0.00697344	0.0172747		2.55568	0.961307	12.1726	0.000484977	0.00288263
LRRFIP1	0.753673	8.93301	9.79796	0.00174705	0.00508496		1.44561	8.81984	12.2183	0.000473227	0.00282428
FAM65C	1.24709	3.0208	11.3046	0.000773168	0.00245571		1.46804	3.07673	6.14741	0.0131605	0.0460314
GPR39	1.75218	1.09274	11.5109	0.000691896	0.00222057		2.00997	1.05884	8.88419	0.0028765	0.0129893
RAB39A	2.41786	0.392887	21.777	3.06e-06	1.56e-05		7.81428	0.215944	44.4716	2.58e-11	7.68e-10
GIPC1	-0.658281	3.52255	5.54475	0.0185362	0.0404147		-2.12635	4.00836	17.1189	3.51e-05	0.000290439
CNIH3	4.45248	4.51338	96.5991	8.49e-23	3.97e-21		2.85065	4.82491	16.0061	6.31e-05	0.000491659
ERG	0.857622	5.36009	5.95607	0.0146667	0.033053		5.40939	5.08626	72.1359	2.01e-17	1.42e-15
TMED4	-0.562527	4.15714	5.46689	0.01938	0.0419665		-1.13767	4.19654	9.45754	0.00210282	0.00998349
ERBB2	-1.64312	5.6317	52.5717	4.15e-13	5.72e-12		-1.06664	4.94738	8.17449	0.00424836	0.0180442
CACNA1E	3.76739	0.596069	6.14276	0.0131951	0.0301876		4.85555	0.56487	8.04395	0.00456558	0.0191629
RAD51-AS1	-2.08589	-0.547223	12.1393	0.000493706	0.00163854		-2.15764	-0.932378	6.7655	0.00929366	0.0348415
CSNK1A1	-0.689838	8.01554	8.06739	0.0045069	0.0117966		-0.837013	7.8662	6.19651	0.0128002	0.0449972
FAM219B	-1.27716	4.88535	31.769	1.74e-08	1.29e-07		-1.19184	4.46899	9.61809	0.0019267	0.00931926
BBOX1-AS1	2.09618	1.42801	17.4464	2.96e-05	0.000126046		7.26019	1.3111	48.1897	3.87e-12	1.29e-10
EML1	2.95895	5.77505	159.062	1.81e-36	3.73e-34		1.35315	6.13436	12.808	0.000345139	0.00215644
SGK223	-1.74587	3.99381	35.348	2.76e-09	2.3e-08		-2.29541	3.97797	15.4347	8.54e-05	0.000642009
BHLHE40	0.952224	8.83347	13.2626	0.000270753	0.000952372		3.3631	8.63195	52.8343	3.63e-13	1.45e-11
SALL4	2.42129	2.26057	12.5156	0.000403567	0.00136312		2.42934	2.42311	7.11875	0.00762819	0.0295824
LOC101929771	4.75727	0.908812	37.2297	1.05e-09	9.26e-09		8.57075	0.935463	30.0165	4.28e-08	6.97e-07
ARHGAP24	1.72779	5.4329	36.4098	1.6e-09	1.38e-08		0.985429	5.67173	7.03325	0.008001	0.0307784
NASP	0.733007	6.89738	10.9717	0.000925142	0.00288326		0.963612	6.86102	6.24494	0.0124549	0.0439772
FDXR	-2.12907	1.66325	30.2419	3.81e-08	2.69e-07		-2.39254	1.18288	14.3537	0.000151478	0.00105612
APLN	3.4059	1.41176	30.64	3.11e-08	2.22e-07		2.01207	1.55912	7.27629	0.00698706	0.0275192
IL1B	1.95666	4.76428	8.6834	0.00321121	0.00874208		3.87535	4.96195	10.0192	0.0015492	0.00773953
TGFB2	1.29548	4.86092	17.3192	3.16e-05	0.00013381		1.2901	4.93699	6.15584	0.0130979	0.0458316
RPS6KA6	-4.14758	3.30242	77.6851	1.21e-18	3.42e-17		-2.85	2.06875	17.1532	3.45e-05	0.000286239
ETV1	3.13542	6.02939	92.6267	6.31e-22	2.66e-20		1.48057	6.39343	7.55674	0.00597859	0.024125
CLGN	4.39673	2.94794	24.9805	5.79e-07	3.37e-06		3.04031	3.20268	12.1497	0.000490959	0.00291508
H2AFJ	-0.971707	4.22795	13.0768	0.00029897	0.00104368		-0.996165	3.93107	6.27483	0.0122465	0.0433238
RAC2	1.36905	4.86571	15.8564	6.83e-05	0.000270069		1.74907	4.81733	14.5627	0.000135574	0.000960037
KANK1	-2.10631	5.2781	82.5641	1.02e-19	3.27e-18		-1.82848	4.67468	30.3589	3.59e-08	5.97e-07
FCGR3A	3.7974	5.38724	107.194	4.04e-25	2.64e-23		13.3093	5.56587	230.177	5.45e-52	6.08e-49
ZNF37BP	-0.598242	4.56037	5.56091	0.0183659	0.0400773		-1.16373	4.70941	7.19385	0.00731538	0.0286215
MYO1D	1.46124	7.95248	21.4761	3.58e-06	1.8e-05		1.67533	8.05696	12.9394	0.000321745	0.0020346
KLF10	0.55982	7.21396	5.68806	0.0170808	0.0376818		1.80494	6.96174	26.8698	2.18e-07	3.08e-06
PTGS1	-2.33785	6.14898	41.4646	1.2e-10	1.2e-09		-2.39951	5.74277	34.1384	5.13e-09	9.98e-08
EVI2B	1.54345	5.20318	46.9317	7.35e-12	8.74e-11		3.94319	5.10994	54.1177	1.89e-13	7.88e-12
MTL5	-2.86166	1.37445	23.7067	1.12e-06	6.24e-06		-2.11418	0.995015	7.37146	0.00662671	0.0263149
HOXA3	1.17046	1.40802	9.76374	0.00177987	0.00517384		2.86733	1.18568	13.7173	0.000212484	0.00141537
RPL13A	-1.67362	6.47969	63.2934	1.78e-15	3.4e-14		-1.47932	5.99678	22.1305	2.55e-06	2.82e-05
IL10	3.67861	-0.324744	23.3748	1.33e-06	7.3e-06		7.00732	-0.452812	26.3935	2.78e-07	3.86e-06
LILRB5	2.7688	1.21502	20.9146	4.8e-06	2.37e-05		7.29138	1.15626	40.4852	1.98e-10	5.07e-09
TRHDE-AS1	-7.07109	2.1756	154.265	2.03e-35	3.86e-33		-7.81239	2.26469	124.668	6.02e-29	1.29e-26
RNASE6	1.57702	3.68696	26.2222	3.04e-07	1.86e-06		11.2825	3.56048	138.027	7.19e-32	2e-29
LOC441081	2.32136	0.410518	16.4793	4.92e-05	0.000200783		6.43305	0.240321	22.4135	2.2e-06	2.48e-05
DCDC2	2.39667	-0.681022	8.75845	0.00308171	0.00842884		4.27327	-0.893412	10.3255	0.00131206	0.00673382
LRRC25	3.60919	1.28098	62.7656	2.33e-15	4.37e-14		6.23583	1.30951	50.0965	1.46e-12	5.29e-11
CCDC158	-3.44038	-0.0373474	22.5897	2.01e-06	1.06e-05		-3.63786	-0.0738889	19.9276	8.04e-06	7.92e-05
TLR9	1.30284	0.707458	8.88844	0.00286981	0.00790903		4.62694	0.419494	31.7872	1.72e-08	3.01e-07
PDLIM1	-1.12025	6.64571	17.7566	2.51e-05	0.000108529		-1.06413	6.39045	7.75958	0.00534283	0.021946
RNF144A	3.08109	6.60562	155.156	1.29e-35	2.52e-33		4.87699	6.76312	80.0036	3.74e-19	3.21e-17
TMEM236	2.93393	-0.916572	10.7439	0.00104622	0.00322178		4.71533	-1.12039	12.096	0.000505309	0.00298755
LRRC6	1.05181	3.43153	5.86101	0.0154799	0.034627		2.06344	3.37703	9.91574	0.00163871	0.0081164
ZNF33B	-1.75957	4.82254	48.2049	3.84e-12	4.71e-11		-1.16574	4.14138	9.92156	0.00163353	0.00809556
PRELP	-2.32624	4.1026	40.6784	1.79e-10	1.76e-09		-4.13936	5.22415	83.7285	5.68e-20	5.13e-18
PTPN13	-0.726665	7.69432	5.41439	0.0199714	0.0430462		-1.46738	7.88626	13.4454	0.00024561	0.00160849
LINC01116	2.60469	2.53955	50.7851	1.03e-12	1.35e-11		3.03168	2.6222	33.869	5.89e-09	1.13e-07
SDCBP	2.21717	7.67	72.1128	2.03e-17	4.94e-16		1.14564	7.99094	9.23274	0.00237726	0.0110604
CD72	1.62298	1.49436	14.2219	0.000162472	0.000597744		2.06622	1.41299	10.1184	0.00146799	0.00738899
VCAM1	2.59951	5.66103	27.4435	1.62e-07	1.03e-06		5.8823	5.78723	37.3242	1e-09	2.23e-08
CDKN1A	-1.85518	7.2753	38.3341	5.96e-10	5.47e-09		-2.48537	7.26224	30.1005	4.1e-08	6.71e-07
SYNPO2	-2.00445	5.62697	56.4332	5.81e-14	9.05e-13		-4.71323	7.38811	126.528	2.36e-29	5.19e-27
LILRB4	2.97489	2.99551	40.085	2.43e-10	2.34e-09		10.745	3.03207	116.956	2.94e-27	5.28e-25
TDO2	6.03598	6.63145	285.731	4.23e-64	7.66e-60		13.0992	6.89144	98.9977	2.53e-23	3.18e-21
SLC6A12	2.25156	-0.0158312	12.0124	0.000528469	0.00174114		7.29319	-0.197843	28.4803	9.47e-08	1.44e-06
CXCR4	1.02783	4.62212	12.5362	0.000399146	0.00135045		8.994	4.33395	107.281	3.86e-25	5.82e-23
TNFSF9	1.99524	1.20009	15.4777	8.35e-05	0.000324635		2.04493	1.23061	6.76039	0.00932036	0.0349143
ARHGAP28	0.993294	5.67064	13.6097	0.000225015	0.000804463		1.16114	5.70009	6.88121	0.00871066	0.0330298
LINC01260	4.24965	0.419234	30.536	3.28e-08	2.33e-07		3.73757	0.439527	8.02933	0.00460258	0.0192929
ADAMTS9	1.17144	5.17347	14.2311	0.000161678	0.000595067		2.28288	5.09655	16.5562	4.72e-05	0.000379241
BOK	-1.62052	3.38791	28.5593	9.09e-08	6.03e-07		-2.75258	3.76246	24.0706	9.29e-07	1.13e-05
LINC01272	2.06766	1.57951	22.6749	1.92e-06	1.02e-05		2.67101	1.57456	14.7272	0.000124241	0.000889957
PCDHGB4	-1.00671	1.41476	5.14381	0.0233294	0.0492231		-2.57663	2.37181	19.2306	1.16e-05	0.000108912
SIGLEC14	3.56093	1.03654	35.5267	2.52e-09	2.12e-08		8.68229	1.01772	52.9641	3.4e-13	1.38e-11
PPP1R3D	-0.879925	3.22381	9.7191	0.00182363	0.00528745		-1.23801	3.1599	10.1486	0.00144414	0.00728867
PGRMC1	-0.841653	7.81656	6.01933	0.01415	0.0320202		-1.52185	7.71612	25.587	4.23e-07	5.62e-06
EMR1	4.066	-0.387109	20.7746	5.17e-06	2.53e-05		4.32096	-0.484133	16.1496	5.85e-05	0.000459626
LOC101928834	2.57899	2.72906	10.5055	0.00119021	0.00361461		10.5422	2.85784	27.6872	1.43e-07	2.1e-06
MTHFR	-0.648115	3.71126	6.13881	0.0132246	0.0302301		-0.933211	3.62209	6.37748	0.0115577	0.0413861
LOC101928710	4.64919	-0.778039	16.695	4.39e-05	0.000181039		3.74499	-0.887653	6.59746	0.0102124	0.0375166
HLA-DRA	1.06733	8.5143	11.9359	0.000550624	0.00180767		10.5085	8.2896	141.051	1.57e-32	4.6e-30
SIGLEC5	3.46429	-0.0616106	24.2706	8.37e-07	4.74e-06		7.42363	-0.179473	26.4225	2.74e-07	3.81e-06
PLAUR	4.4351	6.76341	140.456	2.12e-32	3.11e-30		1.85734	7.16197	23.2147	1.45e-06	1.69e-05
AOAH	1.78182	2.39089	22.0117	2.71e-06	1.4e-05		9.96443	2.26305	88.6098	4.81e-21	4.87e-19
BMP2	0.971403	4.07716	6.562	0.0104179	0.0246149		3.43725	3.88884	29.1536	6.69e-08	1.05e-06
DISP1	0.738306	3.52191	6.25253	0.0124016	0.0286502		1.35382	3.38676	8.65949	0.00325363	0.0144083
PARP14	1.27198	8.00689	14.6786	0.000127484	0.000478952		1.04979	8.14196	6.58142	0.0103049	0.0377649
WWTR1	1.62732	7.79296	41.7897	1.02e-10	1.03e-09		1.36903	7.94847	13.5054	0.00023788	0.00156522
BHLHE41	1.54303	5.02635	25.6015	4.2e-07	2.5e-06		2.27569	5.02463	28.2132	1.09e-07	1.64e-06
ZNF524	-1.13387	0.625869	8.29267	0.00398054	0.0105664		-2.1121	0.532294	8.32685	0.00390633	0.016779
MYOCD	-2.83844	1.84963	11.5944	0.000661498	0.00213246		-4.83247	3.30448	42.9247	5.69e-11	1.59e-09
CCL13	2.00812	2.24518	12.2043	0.000476796	0.00158649		3.5103	2.3168	6.93129	0.00847004	0.032249
IGFLR1	1.50341	1.24017	16.11	5.98e-05	0.000239133		1.72251	1.19035	9.15254	0.00248373	0.0114759
ELFN1	3.43529	4.14904	47.7017	4.96e-12	5.99e-11		2.10498	4.48646	10.19	0.00141202	0.00715463
COL4A5	-4.11354	4.55894	149.258	2.52e-34	4.3e-32		-1.98426	2.30928	10.3066	0.00132552	0.00679229
TENM3	3.9316	6.05326	50.9955	9.26e-13	1.22e-11		2.1106	6.44315	7.51247	0.00612734	0.024642
JAKMIP2	2.57944	1.17958	21.4313	3.67e-06	1.84e-05		4.18219	1.1832	16.3369	5.3e-05	0.000421509
SULF2	1.63754	7.83601	32.5507	1.16e-08	8.89e-08		1.44637	7.99365	11.525	0.000686662	0.00387356
PDE4D	0.851683	5.17466	8.03736	0.00458223	0.0119687		2.5198	5.02709	22.9722	1.64e-06	1.9e-05
CCRL2	2.52289	1.1138	24.9454	5.9e-07	3.43e-06		8.64586	0.991839	51.0863	8.84e-13	3.29e-11
SORCS2	2.62139	3.33758	11.3144	0.000769066	0.0024444		3.36477	3.49696	13.1518	0.000287247	0.00184374
HAS2-AS1	2.9983	0.770292	26.3582	2.84e-07	1.74e-06		2.13683	0.829275	10.1028	0.00148044	0.00744492
KERA	4.21273	-0.880926	8.75781	0.00308279	0.0084305		6.23595	-1.05927	13.819	0.000201287	0.00135319
AGAP1	0.768827	5.47313	13.806	0.000202683	0.000732143		0.80886	5.4565	7.43592	0.00639348	0.0255595
LOC100272216	1.71609	0.775505	11.0628	0.000880768	0.00276065		3.79703	0.49255	14.8572	0.000115965	0.000837192
C3AR1	3.86758	4.30869	78.686	7.28e-19	2.12e-17		8.81729	4.47169	167.406	2.73e-38	1.17e-35
LOC101927244	4.56443	0.701597	29.9059	4.54e-08	3.15e-07		4.07874	0.754724	10.2407	0.00137375	0.00698399
CRYBB1	6.14524	-0.747639	32.0243	1.52e-08	1.14e-07		5.10742	-0.861484	13.7626	0.000207427	0.00138943
KCNMB4	2.6419	3.6605	25.1654	5.26e-07	3.08e-06		2.27755	3.87702	7.47829	0.00624474	0.0250539
LEP	-2.95669	-0.474234	8.49174	0.00356763	0.00959406		-3.48354	-0.988485	13.0878	0.000297232	0.00190115
MICAL2	2.96782	9.06114	90.1063	2.26e-21	8.9e-20		1.93564	9.38606	15.8279	6.94e-05	0.000534547
LINC01296	2.21029	2.31409	13.6303	0.000222562	0.000796165		10.023	2.34283	40.41	2.06e-10	5.24e-09
OPLAH	-2.15323	1.19714	25.3669	4.74e-07	2.8e-06		-2.29923	0.861997	10.803	0.00101333	0.00543442
KCNQ1	2.5033	0.75032	14.8112	0.000118828	0.000448478		8.24807	0.601107	51.1009	8.77e-13	3.28e-11
OPN4	6.43911	-0.266658	22.2845	2.35e-06	1.23e-05		7.12486	-0.327314	13.2896	0.000266877	0.00173149
PLXNC1	2.02491	6.95805	47.3453	5.95e-12	7.15e-11		1.82377	7.15153	14.9392	0.000111034	0.000805007
NRBF2	0.861765	5.85379	13.5181	0.000236278	0.000841407		0.919987	5.8681	6.41697	0.0113035	0.040755
ITGA3	-2.52682	5.74012	43.4402	4.37e-11	4.67e-10		-2.61435	5.76475	19.0336	1.28e-05	0.000119412
DGKI	3.06888	2.94701	53.2975	2.87e-13	4.05e-12		1.88216	3.20305	11.1869	0.00082376	0.00451597
DDX11	0.935958	3.80919	14.0455	0.000178443	0.000650686		1.15425	3.79152	6.44094	0.0111519	0.0403452
HIST1H2BF	1.27362	5.2801	17.871	2.36e-05	0.000102858		1.74852	5.29342	6.76203	0.00931177	0.0348899
CCL26	4.0664	0.161968	23.2742	1.4e-06	7.64e-06		3.38825	0.149773	8.35731	0.00384139	0.0165681
TRIM9	1.8717	2.77478	30.0588	4.19e-08	2.93e-07		4.7399	2.71565	40.8047	1.68e-10	4.35e-09
ERICH5	-4.75041	-0.966639	25.6124	4.17e-07	2.49e-06		-3.80846	-1.78411	10.9764	0.000922771	0.00500138
PSAT1	-2.52398	5.71296	57.9041	2.75e-14	4.46e-13		-3.75975	6.47378	56.9428	4.49e-14	2.07e-12
FBXL3	-0.588308	5.73961	7.80011	0.00522432	0.0134436		-0.937999	5.69418	10.3591	0.0012884	0.00663071
KIAA1462	2.89197	7.73111	113.11	2.04e-26	1.57e-24		1.23524	8.11689	9.37561	0.00219892	0.0103457
CALCOCO1	-0.97577	6.66599	15.2238	9.55e-05	0.000367146		-1.0937	6.47802	11.3036	0.000773576	0.00428389
ZNF219	-1.22642	2.06619	12.0134	0.000528198	0.00174056		-2.31087	2.2335	14.6988	0.000126124	0.00090152
LINC00942	3.88717	0.316418	21.5126	3.52e-06	1.77e-05		3.46155	0.360799	8.60045	0.00336081	0.0147867
RSRP1	-1.0741	4.11219	18.5246	1.68e-05	7.49e-05		-1.126	3.83627	6.16109	0.0130591	0.0457334
MX2	1.57923	4.60861	17.4605	2.93e-05	0.000125172		1.26547	4.74066	6.16462	0.013033	0.0456525
LOC101929122	3.31452	0.00176037	15.8885	6.72e-05	0.000265992		3.3308	-0.0352793	9.76947	0.00177433	0.00868524
ITGAM	2.08299	3.64429	52.2363	4.92e-13	6.73e-12		9.72238	3.60679	153.528	2.94e-35	1.09e-32
MDGA1	3.291	3.50991	64.3206	1.06e-15	2.09e-14		1.57764	3.8455	10.2974	0.00133221	0.00681495
DNM3	0.867772	3.77609	6.71761	0.00954656	0.0227641		1.85418	3.62162	14.2318	0.000161613	0.00111746
CHCHD3	1.04036	5.45761	22.9575	1.66e-06	8.88e-06		0.804131	5.53828	7.17857	0.00737794	0.0288393
ALS2CR11	2.69059	2.42006	24.6797	6.77e-07	3.9e-06		1.99006	2.60712	7.07329	0.00782417	0.0302024
GBP7	1.54457	2.21549	6.96526	0.00831074	0.0201544		7.96037	2.0488	40.3392	2.13e-10	5.4e-09
EML2	-1.62815	2.24897	23.1765	1.48e-06	8.01e-06		-1.88687	1.93361	11.7342	0.000613636	0.00352946
LIMCH1	-1.53057	4.75616	13.0087	0.000310047	0.00107616		-3.21049	5.88652	30.1011	4.1e-08	6.71e-07
ALMS1	1.13365	7.35395	28.2488	1.07e-07	6.98e-07		1.39205	7.36572	12.2953	0.000454096	0.00272816
PTPRG	3.05353	6.98648	173.675	1.17e-39	4.31e-37		0.812656	7.46926	6.55476	0.0104604	0.0382343
STAT4	1.38047	2.52365	11.6588	0.000638999	0.00206729		1.8355	2.54161	8.28407	0.00399943	0.0171362
APLNR	0.820598	5.00693	7.99398	0.00469331	0.0122288		6.5783	4.67186	66.0183	4.47e-16	2.78e-14
LOC101927379	3.37157	0.237372	8.78143	0.00304312	0.00833336		7.72393	0.197626	15.3084	9.13e-05	0.000680589
LOC100507175	3.61426	-1.31151	5.43114	0.0197807	0.0427268		5.58955	-1.54501	10.2737	0.00134941	0.00688117
TNFRSF1B	2.01031	4.77391	58.8468	1.7e-14	2.85e-13		3.44271	4.80176	57.1191	4.1e-14	1.92e-12
IL4I1	3.60477	2.20728	54.7795	1.35e-13	1.99e-12		6.79878	2.2993	51.0174	9.15e-13	3.4e-11
SAMHD1	1.52269	6.30677	22.0075	2.72e-06	1.4e-05		0.97991	6.51719	6.31948	0.0119419	0.0425158
CD68	3.78495	6.49687	168.277	1.76e-38	5.49e-36		2.05888	6.83884	23.6637	1.15e-06	1.36e-05
SERPINB7	-2.14102	4.27904	24.6065	7.03e-07	4.04e-06		-2.89003	4.75879	14.011	0.000181747	0.00123876
LILRA2	3.51266	-0.982932	11.1009	0.000862844	0.00271069		6.21101	-1.2133	19.2146	1.17e-05	0.000109582
RBM5-AS1	-0.918077	2.77415	5.80773	0.0159558	0.0355379		-1.43688	2.77513	10.3696	0.00128108	0.0065991
SNAPC3	-0.508324	4.77178	5.5032	0.0189817	0.0412025		-1.27566	4.93459	20.7898	5.13e-06	5.27e-05
CAAP1	-1.50073	3.85129	31.5162	1.98e-08	1.46e-07		-1.08937	3.29751	8.12358	0.00436931	0.0184875
FCGR2B	0.889766	1.68305	5.24676	0.0219876	0.0467244		8.99275	1.33788	57.6966	3.06e-14	1.46e-12
APBB2	1.81418	7.34673	56.9597	4.45e-14	7.03e-13		1.17935	7.57612	11.3698	0.000746488	0.0041647
DOK3	1.32541	2.8537	18.9313	1.36e-05	6.15e-05		2.11526	2.78489	14.2715	0.000158242	0.00109915
F13A1	2.31766	5.81596	85.7352	2.06e-20	7.21e-19		10.4613	5.83033	282.218	2.47e-63	1.03e-59
NPR3	-2.18664	4.07282	28.56	9.08e-08	6.03e-07		-1.82845	3.5006	12.9189	0.000325274	0.00205225
MAFB	1.39223	7.15996	18.0456	2.16e-05	9.46e-05		6.75072	7.08627	77.9304	1.07e-18	8.5e-17
ALDOC	-2.00393	2.78681	25.1725	5.24e-07	3.07e-06		-2.123	2.59592	13.2098	0.000278495	0.00179642
ADH1B	-4.79081	2.89098	20.3894	6.32e-06	3.05e-05		-3.89865	2.41809	10.7911	0.00101989	0.00546074
KMO	1.4138	1.33823	9.15748	0.00247704	0.00694714		4.10555	1.16728	23.8308	1.05e-06	1.26e-05
RANBP3L	2.63083	4.16804	10.8458	0.000990182	0.00306328		7.76296	4.36059	23.6298	1.17e-06	1.39e-05
NTRK1	3.36095	-0.973184	8.998	0.00270275	0.0075078		6.0561	-1.20555	14.4305	0.00014543	0.00101956
COL6A1	4.54459	10.8587	149.127	2.69e-34	4.55e-32		2.00231	11.2727	17.6275	2.69e-05	0.00022846
PCK2	-1.35325	4.99423	13.7479	0.000209057	0.000752613		-2.55958	5.35154	37.492	9.18e-10	2.06e-08
NINJ2	1.18808	3.11419	6.20797	0.0127176	0.0292431		3.0715	2.9654	22.966	1.65e-06	1.91e-05
SLC25A27	-2.16497	2.56977	21.1707	4.2e-06	2.09e-05		-1.75537	1.88625	9.27591	0.00232188	0.0108449
LILRA1	2.04713	0.99553	9.12076	0.00252725	0.00707483		6.96479	0.8384	34.8971	3.48e-09	6.99e-08
TAPT1-AS1	-1.66582	2.54138	30.0762	4.15e-08	2.91e-07		-1.87537	2.10633	9.46456	0.00209479	0.00995384
EFHD1	-1.74849	1.59416	14.2528	0.000159826	0.000588849		-5.54717	4.29647	88.9166	4.12e-21	4.2e-19
FCGR2A	3.77036	6.53704	129.851	4.42e-30	4.87e-28		9.1062	6.72602	227.677	1.91e-51	1.88e-48
IL10RA	1.0899	4.42467	19.6238	9.43e-06	4.38e-05		10.3404	4.1454	170.319	6.3e-39	2.77e-36
EYA4	3.87126	3.95881	8.68642	0.0032059	0.00872893		5.33337	4.18735	12.6378	0.00037803	0.00233663
CXCL5	3.02633	4.07954	9.67955	0.0018633	0.00539124		4.9271	4.34041	10.0413	0.00153072	0.00765408
ECI1	-1.3025	3.5708	15.9538	6.49e-05	0.000257423		-1.41294	3.21032	12.8477	0.000337886	0.00212222
RDH10	-0.765345	4.52521	8.71206	0.00316111	0.00861996		-4.2516	6.80133	112.604	2.63e-26	4.36e-24
PARP15	1.13759	1.59313	8.18418	0.00422573	0.0111436		3.32025	1.32344	20.2577	6.77e-06	6.79e-05
DISC1	1.08688	0.802906	6.33208	0.0118573	0.0275484		2.25581	0.607253	11.4217	0.000725924	0.0040608
HAVCR2	2.27026	3.49162	59.5144	1.21e-14	2.08e-13		7.57564	3.48527	105.946	7.58e-25	1.1e-22
LOC102724814	-1.60348	0.567678	12.741	0.000357727	0.00122335		-2.33542	0.524777	11.904	0.000560136	0.00326377
SPECC1	1.52288	6.64345	32.0539	1.5e-08	1.13e-07		1.58474	6.7714	12.3066	0.000451356	0.00271463
CEACAM21	1.70659	-0.437426	8.04995	0.00455049	0.0118995		6.66843	-0.753458	22.2065	2.45e-06	2.73e-05
HLA-DRB1	1.34318	7.20422	24.4505	7.62e-07	4.35e-06		11.2036	7.07703	134.956	3.38e-31	8.56e-29
MICU2	-0.969984	4.01998	14.1725	0.000166786	0.000611767		-1.3414	3.97755	12.8089	0.00034497	0.00215619
APMAP	-2.13393	7.44621	52.4547	4.4e-13	6.06e-12		-0.83667	6.00833	7.66712	0.00562363	0.0229528
CCR8	1.80798	-0.655278	5.79495	0.0160723	0.0357533		4.86887	-0.965269	14.1036	0.000173016	0.00118601
MLPH	2.14525	4.84285	20.2144	6.92e-06	3.31e-05		1.87815	5.09333	6.30881	0.012014	0.0427181
PLTP	1.72111	6.15833	63.5314	1.58e-15	3.04e-14		2.98489	6.16124	60.732	6.54e-15	3.42e-13
CD2	1.24946	3.32646	10.1714	0.00142633	0.00424218		10.7771	3.06908	92.9498	5.36e-22	6.02e-20
GPR116	0.941585	4.89869	8.9298	0.00280555	0.00775553		5.85155	4.68233	46.2237	1.05e-11	3.33e-10
SDC4	-0.559996	6.48622	5.3097	0.021207	0.0453316		-1.48818	6.76915	18.9161	1.37e-05	0.000125946
TREM1	3.73019	3.47815	25.2369	5.07e-07	2.97e-06		11.42	3.697	33.5543	6.93e-09	1.31e-07
SLC6A7	2.98682	-0.494001	8.81026	0.00299542	0.00822339		3.37784	-0.662147	7.27616	0.00698757	0.0275192
CD53	1.66169	4.43247	37.2614	1.03e-09	9.13e-09		10.5165	4.32134	180.615	3.56e-41	2.05e-38
LINC01268	1.19861	0.206115	6.64767	0.00992854	0.0235941		2.61098	-0.00615306	11.6318	0.000648332	0.0036922
NCAM1	5.15754	6.10783	78.6179	7.54e-19	2.18e-17		4.02635	6.40033	25.8104	3.77e-07	5.07e-06
MLF1	0.819178	2.97652	6.20096	0.0127681	0.0293406		1.25238	2.87665	6.38727	0.0114942	0.041185
AZIN2	1.40462	2.15146	10.9633	0.000929364	0.00289593		2.1854	2.08441	13.5993	0.000226271	0.00149767
LINC01018	-4.28028	2.15347	59.3554	1.32e-14	2.24e-13		-2.41086	-0.209091	11.6279	0.000649704	0.0036967
LOC102724663	2.38689	-0.959842	5.78264	0.0161852	0.0359734		6.14399	-1.21089	14.5808	0.000134274	0.000952848
AMIGO1	-3.25889	1.37703	39.5661	3.17e-10	3.01e-09		-3.1882	1.12727	19.4457	1.04e-05	9.86e-05
EPSTI1	2.30761	4.71498	24.0469	9.4e-07	5.29e-06		1.88531	4.88797	12.2867	0.00045619	0.00273976
EEF2	-0.771006	10.0752	9.1898	0.00243367	0.00684804		-1.33416	10.1047	15.3504	8.93e-05	0.000667112
CPA3	2.01771	4.96881	8.98736	0.00271853	0.00754494		7.85568	4.88047	53.8607	2.15e-13	8.91e-12
KCNE3	2.7281	1.60791	28.8478	7.83e-08	5.25e-07		1.97222	1.73577	9.9584	0.00160117	0.00795403
ZNF667	-2.91276	1.43517	27.3099	1.73e-07	1.1e-06		-3.24144	1.54616	20.7759	5.16e-06	5.3e-05
ALDH4A1	-2.36908	3.91068	70.1587	5.47e-17	1.27e-15		-1.75762	3.01273	21.5214	3.5e-06	3.75e-05
PDLIM2	-1.78802	2.77587	26.3769	2.81e-07	1.72e-06		-4.00258	4.03155	74.4194	6.32e-18	4.74e-16
ATRNL1	-2.53058	0.9646	19.9521	7.94e-06	3.75e-05		-2.65006	0.787439	10.715	0.00106273	0.00565369
NOS2	2.82042	-0.512888	11.523	0.00068739	0.00220689		4.97742	-0.682204	12.69	0.000367621	0.00228072
KRT81	-4.63396	0.347404	11.7196	0.000618457	0.00200766		-6.36638	0.369087	24.0926	9.18e-07	1.12e-05
ITGB2	1.83194	4.45515	50.4302	1.23e-12	1.61e-11		6.93697	4.39358	133.418	7.32e-31	1.8e-28
LDB1	-0.952143	5.46915	13.3237	0.000262066	0.00092451		-0.916114	5.19044	6.58585	0.0102792	0.0377041
ERVV-2	4.44273	-1.35205	8.4027	0.00374665	0.0100249		5.51966	-1.56911	6.40712	0.0113664	0.0409023
HS3ST2	2.42227	2.16661	9.96659	0.00159406	0.00468715		7.63017	2.18009	24.1992	8.69e-07	1.07e-05
COL24A1	3.05597	3.59049	19.9784	7.83e-06	3.71e-05		2.64793	3.82593	12.233	0.000469526	0.00280675
C2	2.64179	3.71969	56.5403	5.51e-14	8.61e-13		3.39644	3.81815	39.0735	4.08e-10	9.79e-09
RUNX1-IT1	1.28984	1.58068	6.52448	0.01064	0.0250577		3.79013	1.42204	17.182	3.4e-05	0.000282321
DEPDC7	1.35927	3.1351	16.9514	3.83e-05	0.000160057		1.15779	3.2121	7.1763	0.00738729	0.0288691
TTC39C	-1.05824	5.93263	24.6779	6.78e-07	3.91e-06		-1.83005	6.11011	30.495	3.35e-08	5.59e-07
ZIC1	3.57617	3.89905	53.6591	2.38e-13	3.42e-12		3.34686	4.08551	25.2473	5.04e-07	6.57e-06
AR	-3.24711	5.828	36.0792	1.89e-09	1.62e-08		-2.4813	5.20014	15.6864	7.48e-05	0.00057151
LY86	1.22114	1.79105	10.5266	0.00117669	0.00358092		9.19178	1.52177	68.9121	1.03e-16	6.81e-15
FAM92A1	1.63248	4.65852	43.1941	4.96e-11	5.24e-10		0.911925	4.89362	6.07	0.0137497	0.0476978
MGC15885	4.56375	-0.82497	14.8516	0.000116312	0.0004399		4.99126	-0.963547	10.1911	0.00141119	0.00715261
LOC440311	-1.6459	0.952264	17.7879	2.47e-05	0.00010689		-3.3648	1.54396	31.4	2.1e-08	3.61e-07
SHROOM3	-1.63465	4.12904	11.4568	0.000712324	0.00228047		-4.25425	6.03581	56.9797	4.4e-14	2.04e-12
SAMD12	-2.12955	3.30798	21.0285	4.52e-06	2.24e-05		-2.58562	3.59261	20.7831	5.14e-06	5.28e-05
PMEPA1	2.6159	7.67652	123.877	8.96e-29	8.74e-27		4.00177	7.80494	85.2347	2.65e-20	2.53e-18
ARHGAP9	0.989242	2.60962	7.29261	0.00692388	0.0171684		5.68057	2.32255	50.5118	1.18e-12	4.34e-11
ALOX5AP	1.70581	3.80987	18.8485	1.42e-05	6.4e-05		6.06097	3.7412	55.0544	1.17e-13	5.03e-12
UPF3A	-0.542277	4.68631	5.91088	0.0150476	0.0337937		-0.84168	4.62604	6.46021	0.0110317	0.0399991
SH3PXD2B	2.79157	8.25187	84.5516	3.74e-20	1.26e-18		2.43876	8.49901	24.5274	7.33e-07	9.19e-06
FGD4	-1.43876	5.39044	42.8918	5.79e-11	6.05e-10		-1.25873	4.93435	11.414	0.000728937	0.00407629
CTDSPL	-1.12762	6.35052	27.6591	1.45e-07	9.26e-07		-0.701739	5.83098	6.32185	0.0119259	0.0424861
PLXDC1	2.85307	7.3508	30.4501	3.43e-08	2.43e-07		5.94619	7.53213	39.5224	3.24e-10	7.92e-09
HLA-DQA1	1.03789	6.2305	13.7683	0.0002068	0.000745662		12.2367	6.03436	143.787	3.96e-33	1.25e-30
DTNA	0.890111	3.504	5.57091	0.0182613	0.0398634		1.34342	3.40988	8.50524	0.00354126	0.0154328
GFRA1	-4.46294	5.61846	55.6382	8.71e-14	1.33e-12		-4.34883	5.78555	30.1031	4.1e-08	6.71e-07
POSTN	5.24062	12.3728	89.4631	3.12e-21	1.21e-19		4.34716	12.6748	37.0949	1.13e-09	2.48e-08
ITGAL	1.0842	3.49635	10.8999	0.000961719	0.00298646		8.72229	3.25494	92.0805	8.32e-22	9.22e-20
FAM212B	-1.57548	4.18017	34.8519	3.56e-09	2.92e-08		-2.16112	4.2889	24.5035	7.42e-07	9.28e-06
SIGLEC1	2.56066	3.36305	68.0459	1.6e-16	3.47e-15		6.86118	3.38661	72.91	1.36e-17	9.91e-16
ZCCHC14	1.48388	7.24446	26.4115	2.76e-07	1.69e-06		1.66348	7.35014	12.6654	0.000372489	0.00230665
EPS8L2	-2.84329	3.51325	44.8884	2.09e-11	2.32e-10		-2.70069	2.82883	21.1415	4.27e-06	4.48e-05
RPL23	-1.2457	8.48462	29.0734	6.97e-08	4.72e-07		-0.744594	7.91962	6.51983	0.0106678	0.0387977
TFEC	2.54629	2.40125	39.1636	3.9e-10	3.66e-09		8.52903	2.36457	93.2473	4.62e-22	5.22e-20
MCM2	1.11198	4.59867	16.9058	3.93e-05	0.000163643		1.00545	4.64687	6.91243	0.00855988	0.0325392
FAM149A	1.32248	2.19115	10.5332	0.00117248	0.0035699		2.47629	2.12365	12.1102	0.000501464	0.00296902
PHGDH	-2.19182	5.3871	56.5698	5.42e-14	8.49e-13		-3.18	5.86514	51.2795	8.01e-13	3.02e-11
LOC90768	4.86369	2.88597	66.772	3.05e-16	6.39e-15		2.17632	3.20728	7.26652	0.00702519	0.0276478
NRROS	1.14246	2.49482	8.76027	0.00307863	0.00842296		4.15263	2.25507	35.887	2.09e-09	4.4e-08
GPR141	1.2714	0.0921107	6.36175	0.0116606	0.0271262		7.31012	-0.252048	32.0534	1.5e-08	2.65e-07
MMP9	3.81545	4.03004	64.8489	8.09e-16	1.61e-14		11.914	4.18294	130.021	4.05e-30	9.69e-28
KIAA1024	2.85226	4.94491	30.1482	4e-08	2.81e-07		3.52359	5.18457	18.7594	1.48e-05	0.000135533
ADAM17	0.690319	6.80153	9.82798	0.00171877	0.00501314		1.23311	6.69025	14.5793	0.000134381	0.000953181
MGC57346	-3.03945	1.95809	46.8726	7.58e-12	8.97e-11		-3.08442	1.70232	24.4128	7.78e-07	9.68e-06
MMP13	3.02158	3.29394	20.6308	5.57e-06	2.72e-05		5.55174	3.40643	20.0261	7.64e-06	7.56e-05
CXCL9	1.54543	6.92987	9.36097	0.00221654	0.00630348		14.5552	6.80711	119.24	9.28e-28	1.72e-25
ITPR1	1.01498	5.75101	17.3404	3.12e-05	0.000132532		1.86143	5.62901	19.2668	1.14e-05	0.000107109
RPL23A	-0.922323	4.85951	17.5253	2.84e-05	0.000121203		-0.985066	4.61299	8.28393	0.00399975	0.0171362
SLC25A23	-2.84358	5.21914	42.6575	6.52e-11	6.78e-10		-1.99022	4.61223	11.7972	0.000593183	0.00342478
DLX1	2.65048	2.06522	34.3496	4.6e-09	3.72e-08		4.67844	2.0776	29.8776	4.6e-08	7.44e-07
CXCL1	2.16916	6.02318	8.17167	0.00425497	0.0112158		3.80621	6.3095	7.98446	0.00471804	0.0196878
SORT1	-1.93165	6.59036	50.727	1.06e-12	1.39e-11		-1.76847	6.18386	19.7196	8.97e-06	8.71e-05
ABCB5	4.27926	3.62073	26.4826	2.66e-07	1.64e-06		8.80475	3.80234	27.4119	1.64e-07	2.39e-06
BOC	-1.85461	4.85401	25.0863	5.48e-07	3.2e-06		-1.64912	4.50411	11.5543	0.000675919	0.00382457
DYSF	1.49733	3.86375	19.2916	1.12e-05	5.16e-05		3.86517	3.73089	56.3672	6.01e-14	2.73e-12
LINC01048	7.26322	0.0454722	49.8042	1.7e-12	2.17e-11		4.49843	0.0462465	16.7862	4.18e-05	0.000340845
XCL1	2.56884	0.0458624	14.8198	0.000118284	0.000446799		4.06267	-0.0994452	12.9068	0.000327396	0.00206253
CPN2	5.26259	1.27642	38.0046	7.06e-10	6.39e-09		7.50901	1.35472	36.8865	1.25e-09	2.73e-08
KCNH5	-3.31178	-1.25314	7.25339	0.00707673	0.0175042		-3.63118	-1.54838	10.417	0.00124858	0.00646553
FOLR2	3.92242	3.86897	88.2068	5.9e-21	2.2e-19		10.1372	4.00959	178.371	1.1e-40	5.93e-38
KCND3	-3.61546	3.34067	48.773	2.87e-12	3.57e-11		-3.08541	2.95407	16.8029	4.15e-05	0.000338197
CD209	3.58093	4.3526	47.7521	4.84e-12	5.85e-11		12.254	4.51404	111.834	3.89e-26	6.37e-24
DOCK4	1.59489	5.46694	40.8498	1.64e-10	1.62e-09		4.2578	5.36603	86.4407	1.44e-20	1.38e-18
CTTNBP2	2.12189	4.26757	54.8591	1.29e-13	1.92e-12		6.73702	4.2655	79.3626	5.17e-19	4.28e-17
LILRB2	3.19893	2.99277	55.886	7.68e-14	1.18e-12		9.25583	3.07789	91.9316	8.97e-22	9.81e-20
ENTPD7	0.794512	6.20906	7.67316	0.00560482	0.0142932		1.0809	6.15242	10.0522	0.00152169	0.0076112
PTHLH	1.40046	3.92656	7.0083	0.00811327	0.0197656		4.09253	3.68897	29.0816	6.94e-08	1.09e-06
EBI3	2.14649	0.108563	12.78	0.000350345	0.00120083		2.73321	-0.0276314	7.67936	0.0055856	0.0228088
MGST1	-4.775	7.82563	59.5234	1.21e-14	2.08e-13		-2.42612	5.5762	15.0323	0.000105685	0.000771913
EPYC	6.36115	1.78155	64.4313	1e-15	1.98e-14		8.07278	1.91279	25.0261	5.66e-07	7.3e-06
FZD1	1.5699	7.01648	25.1791	5.22e-07	3.06e-06		2.00931	7.05449	26.494	2.64e-07	3.68e-06
HAS2	3.53568	7.0242	54.07	1.93e-13	2.81e-12		3.29106	7.35155	11.3984	0.000735061	0.00410368
TMEM176B	2.48616	4.35088	31.5104	1.98e-08	1.46e-07		2.25658	4.54044	8.78469	0.00303768	0.0136069
KDR	1.03451	5.43349	13.9267	0.000190084	0.00068952		4.95892	5.19605	34.5797	4.09e-09	8.12e-08
SPI1	1.76345	1.14662	14.0193	0.000180944	0.000659007		8.61337	0.952744	54.4722	1.58e-13	6.66e-12
PLAU	2.07205	5.82746	33.0085	9.18e-09	7.12e-08		1.63789	6.07622	8.24303	0.00409088	0.0174596
FAM73B	-1.59398	2.51706	23.2775	1.4e-06	7.64e-06		-1.63092	2.00858	9.54177	0.00200848	0.00961746
PIK3CG	1.21501	4.01426	22.1566	2.51e-06	1.3e-05		8.63242	3.78459	149.254	2.52e-34	8.79e-32
ENPEP	2.72054	4.78824	36.2422	1.74e-09	1.5e-08		3.73035	4.98599	14.1422	0.000169502	0.00116526
VAC14	1.09195	6.56619	17.3805	3.06e-05	0.000130122		1.35713	6.58262	13.7248	0.000211644	0.00141259
CDC7	0.687911	4.19771	7.38155	0.00658963	0.0164319		1.17681	4.09384	7.63172	0.00573506	0.0233166
CBX7	-1.42261	2.78571	14.5556	0.000136083	0.000509041		-1.64038	2.48981	9.83062	0.0017163	0.0084432
GBP5	2.88449	5.18316	39.5226	3.24e-10	3.08e-09		11.5213	5.30626	94.4488	2.52e-22	2.96e-20
MPST	-1.22614	2.71583	16.7747	4.21e-05	0.000174424		-1.78978	2.58255	11.2662	0.000789331	0.00436001
GNB2L1	-0.817772	8.615	11.0118	0.000905314	0.00283024		-0.988115	8.48645	7.31567	0.00683559	0.0270033
BCL6B	1.85191	3.95601	15.3385	8.99e-05	0.000347652		7.44628	3.89759	81.7938	1.51e-19	1.32e-17
ALCAM	-1.07284	7.1084	11.2032	0.000816548	0.00258127		-2.42875	7.68035	37.3629	9.81e-10	2.19e-08
IDO1	2.94916	4.64523	29.4057	5.87e-08	4.03e-07		10.3262	4.8461	41.5582	1.14e-10	3.03e-09
OSM	3.33115	-0.301286	18.5635	1.64e-05	7.35e-05		7.11423	-0.432399	19.5497	9.8e-06	9.4e-05
ACTC1	-2.73512	1.99095	8.98924	0.00271574	0.0075395		-3.05229	1.71826	10.852	0.000986872	0.00530583
LCP1	0.991862	7.24778	14.8539	0.000116169	0.000439453		10.0142	6.97967	174.563	7.46e-40	3.78e-37
C16orf54	1.9956	0.506254	11.9479	0.000547076	0.00179786		7.87275	0.273621	42.0688	8.81e-11	2.37e-09
LAMA1	3.73047	5.3122	54.9887	1.21e-13	1.8e-12		3.37594	5.56272	31.4015	2.1e-08	3.61e-07
PGD	-0.758362	6.94928	10.2666	0.0013546	0.00405014		-0.966544	6.74057	11.1213	0.000853401	0.00466013
RGS16	2.33939	3.73269	23.8106	1.06e-06	5.93e-06		4.92922	3.84419	26.8564	2.19e-07	3.1e-06
LYZ	1.3691	6.64555	15.1303	0.000100339	0.000384472		11.5075	6.50405	121.611	2.81e-28	5.4e-26
PPT1	1.00909	6.5565	23.2088	1.45e-06	7.89e-06		1.15786	6.55568	13.5346	0.000234208	0.00154227
RTN4RL2	2.94301	3.17688	35.3433	2.76e-09	2.31e-08		6.13377	3.28741	43.7559	3.72e-11	1.08e-09
GAB3	1.28083	2.45006	13.5699	0.000229839	0.000820576		3.29617	2.27849	32.9352	9.53e-09	1.74e-07
ME1	-3.21405	7.35313	83.4196	6.64e-20	2.18e-18		-1.25314	5.28647	12.9201	0.000325071	0.00205175
PHACTR1	1.39621	3.77422	24.4876	7.48e-07	4.28e-06		1.76718	3.79914	10.8197	0.00100424	0.00539228
AJUBA	-1.6893	5.00002	32.1148	1.45e-08	1.1e-07		-3.2041	5.74435	90.0186	2.36e-21	2.51e-19
HOXB7	4.22266	2.82708	91.0177	1.42e-21	5.81e-20		9.13372	2.95779	116.591	3.53e-27	6.28e-25
TUBB2A	0.777602	5.42017	7.23098	0.0071656	0.017695		1.30589	5.2428	11.6278	0.000649717	0.0036967
PPIEL	-1.24456	2.59864	7.85581	0.00506578	0.0130826		-1.3222	2.38919	6.68389	0.0097288	0.0360967
GTSF1	1.96168	-0.139109	10.4883	0.00120134	0.00364491		7.15945	-0.390164	25.0102	5.7e-07	7.35e-06
IFI44L	1.00434	5.48287	5.20206	0.0225601	0.0477839		2.89874	5.39778	11.335	0.000760607	0.00423077
RANGAP1	-1.13699	4.90757	27.2696	1.77e-07	1.12e-06		-1.80686	4.98813	20.8567	4.95e-06	5.12e-05
PLEK	2.2443	3.8584	45.6335	1.43e-11	1.63e-10		8.23503	3.86106	93.9469	3.24e-22	3.76e-20
WWC3	0.874275	5.83075	20.1276	7.24e-06	3.45e-05		0.802514	5.86542	6.63111	0.0100213	0.0369531
SAMD9L	2.19879	6.35216	47.0513	6.92e-12	8.24e-11		1.28346	6.63312	10.7553	0.00103983	0.00555483
VENTX	1.89331	0.470348	8.37737	0.00379923	0.01014		7.83849	0.2242	36.1602	1.82e-09	3.87e-08
C1orf220	-1.66301	0.428642	9.07901	0.0025856	0.00721696		-1.99695	0.513161	9.04657	0.00263189	0.0120407
GFI1	2.14843	0.152584	6.81299	0.00904971	0.021708		3.74365	-0.0145488	16.4025	5.12e-05	0.000408522
CAMK2N2	2.93563	0.55723	20.3564	6.43e-06	3.1e-05		2.45108	0.573602	9.9619	0.00159813	0.00794361
PLXNB1	-2.4902	4.80219	81.8937	1.44e-19	4.48e-18		-1.49885	3.64916	12.8391	0.000339455	0.00212968
HORMAD1	0.851741	3.40086	5.72538	0.0167215	0.0370199		10.7892	3.0475	40.4159	2.05e-10	5.23e-09
RTN4	-0.729688	9.09612	7.55112	0.00599728	0.0151299		-2.16772	9.62207	43.6456	3.94e-11	1.14e-09
LMF1-AS1	-2.81594	-1.14647	8.43209	0.00368656	0.00988134		-5.17833	0.301549	51.5421	7.01e-13	2.68e-11
ARRDC4	-1.34498	5.51574	20.2889	6.66e-06	3.2e-05		-2.18453	5.767	33.918	5.75e-09	1.1e-07
HSPA12B	0.949581	2.0413	5.71295	0.0168402	0.0372464		1.80159	1.94945	6.69802	0.00965202	0.0358914
CPXM2	-1.53616	1.98008	16.6502	4.49e-05	0.000184838		-4.53289	4.0573	46.7301	8.15e-12	2.59e-10
EOMES	1.91217	0.372046	9.16218	0.00247068	0.00693253		7.68989	0.14279	28.7375	8.29e-08	1.28e-06
MFAP2	4.58518	4.87362	135.506	2.56e-31	3.36e-29		1.52418	5.2991	9.36237	0.00221485	0.010409
TMEM35	-3.18757	-1.7154	7.82174	0.00516214	0.013303		-6.34829	-0.14368	51.7608	6.27e-13	2.41e-11
TEX40	2.80687	-0.17693	10.1212	0.00146576	0.00434022		4.16949	-0.337851	11.3338	0.000761087	0.00423203
SLC5A12	3.39479	-0.499064	16.7446	4.28e-05	0.000176972		2.98877	-0.605486	9.44568	0.00211647	0.0100283
FAIM2	-1.4041	-0.0505611	6.43574	0.0111847	0.0261737		-3.05848	0.874804	19.6138	9.48e-06	9.13e-05
LOC101927053	3.31845	-1.2708	5.64047	0.0175505	0.0385208		5.88603	-1.50033	8.40374	0.00374451	0.0161836
SIRPG	1.46253	1.14403	10.1836	0.00141694	0.00421703		8.50544	0.884101	39.7836	2.84e-10	7.03e-09
CBLB	1.78292	6.18089	74.6927	5.5e-18	1.42e-16		1.35164	6.36804	17.1234	3.5e-05	0.000289895
RPS6	-2.08835	9.51346	66.214	4.05e-16	8.33e-15		-1.31218	8.58592	18.4895	1.71e-05	0.000153879
WISP1	4.89795	7.22388	235.979	2.96e-53	7.66e-50		5.54723	7.48677	82.2515	1.2e-19	1.07e-17
TST	-2.75925	5.39061	60.5485	7.18e-15	1.27e-13		-0.992	3.54438	6.44067	0.0111537	0.0403452
DUSP10	2.06592	5.12333	76.6313	2.06e-18	5.59e-17		1.2706	5.37739	10.181	0.00141894	0.00717664
IFI44	1.65206	5.77297	28.4212	9.76e-08	6.43e-07		2.39129	5.78011	30.3974	3.52e-08	5.86e-07
COL6A6	2.17965	5.75916	9.80105	0.00174412	0.00507806		5.24662	5.8938	16.1208	5.94e-05	0.000466013
C11orf96	1.83268	1.66277	10.1825	0.00141777	0.00421881		1.85781	1.67309	6.43329	0.0112001	0.0404484
METRNL	2.13512	5.83735	67.1582	2.51e-16	5.29e-15		1.13102	6.12724	9.53069	0.00202065	0.00966024
LOC101929260	2.6628	0.194665	10.5401	0.0011681	0.00355894		6.10795	0.102191	13.0543	0.000302586	0.00193022
HMCN1	3.32855	9.19222	106.561	5.55e-25	3.54e-23		3.7624	9.41666	47.1425	6.6e-12	2.12e-10
EIF4A2	-0.693806	7.71872	10.1529	0.00144077	0.00427671		-1.27369	7.77779	17.3514	3.11e-05	0.000260074
CYBB	3.21004	6.25199	119.934	6.54e-28	5.89e-26		11.3876	6.39279	265.814	9.28e-60	2.59e-56
FRMD7	3.60382	0.817577	17.0444	3.65e-05	0.000153184		6.96104	0.796335	25.8559	3.68e-07	4.96e-06
LINC00920	1.69565	-0.404335	7.20161	0.00728384	0.0179503		3.68	-0.671295	14.0825	0.00017496	0.00119835
HP08942	4.22588	0.186991	20.7831	5.14e-06	2.52e-05		4.63577	0.136758	17.1656	3.43e-05	0.000284519
CD22	1.89595	-0.257603	7.65393	0.00566489	0.0144258		4.63968	-0.552054	18.4652	1.73e-05	0.000155354
ETV6	0.70941	7.29715	11.4772	0.000704539	0.00225794		0.901011	7.24822	5.98676	0.0144136	0.0494427
DHRS3	-2.02932	5.22408	49.3861	2.1e-12	2.67e-11		-3.5131	5.95501	75.3332	3.98e-18	3.02e-16
DCLRE1B	1.54163	5.14611	49.044	2.5e-12	3.15e-11		1.44746	5.26006	12.5814	0.000389595	0.00239748
PILRA	2.33134	2.7649	40.1221	2.39e-10	2.3e-09		4.65994	2.75592	49.7421	1.75e-12	6.21e-11
GUCY1A2	3.0607	6.40843	63.5559	1.56e-15	3e-14		3.32038	6.63641	34.522	4.21e-09	8.33e-08
ITGA9	0.884264	4.05702	7.78477	0.00526885	0.0135388		2.83193	3.86656	22.3575	2.26e-06	2.55e-05
RPF2	0.653575	5.77581	8.97305	0.0027399	0.00759378		0.776063	5.69978	6.24573	0.0124493	0.0439668
POMK	0.872792	4.20341	13.9487	0.000187863	0.000682148		1.09726	4.18017	6.19026	0.0128455	0.045109
C5AR1	3.56765	3.90972	92.7484	5.94e-22	2.51e-20		6.39316	4.05146	105.893	7.78e-25	1.12e-22
CETN3	-0.960746	2.27358	7.14171	0.00753114	0.0185118		-1.25373	2.19006	6.46844	0.0109807	0.0398408
SH3TC2	-3.17152	2.32777	46.8642	7.61e-12	8.99e-11		-2.22786	1.05817	17.5277	2.83e-05	0.000239804
PITPNM3	-3.09484	3.66476	62.1574	3.17e-15	5.83e-14		-1.85451	2.46441	11.5735	0.000668971	0.00379038
TMEM245	-0.597678	6.50902	7.57191	0.00592849	0.0149856		-0.743926	6.36847	6.6161	0.0101061	0.0371995
IL12RB1	1.56729	0.619235	10.369	0.00128152	0.00385137		4.4396	0.394987	22.9782	1.64e-06	1.9e-05
LGALS9	2.06597	4.25197	31.7532	1.75e-08	1.3e-07		2.56565	4.35021	21.6017	3.36e-06	3.61e-05
CLEC4E	2.96825	-0.210831	13.5847	0.000228037	0.000814464		7.17409	-0.39307	25.9523	3.5e-07	4.76e-06
EIF3L	-0.996822	7.85989	19.7443	8.85e-06	4.14e-05		-0.704429	7.43145	6.02989	0.0140656	0.0485675
LINC01340	3.72484	-0.425913	12.2981	0.000453425	0.00151793		3.81135	-0.572769	10.3458	0.00129773	0.00667049
RPL9	-1.29795	3.33081	19.647	9.31e-06	4.34e-05		-2.22651	3.51014	17.8027	2.45e-05	0.000211126
ZNF229	-1.81679	0.818493	8.93534	0.00279705	0.00773795		-3.72492	1.98997	31.0368	2.53e-08	4.29e-07
ZFC3H1	-0.481175	6.7814	5.78858	0.0161306	0.0358741		-0.809423	6.73155	7.14426	0.00752041	0.0292935
ABCC3	-2.19678	4.0993	64.2804	1.08e-15	2.12e-14		-3.78406	4.91581	109.99	9.85e-26	1.55e-23
IKZF3	1.03928	3.57281	6.75999	0.00932245	0.0223061		9.34225	3.30794	78.4137	8.36e-19	6.69e-17
LINC00922	5.52543	-1.01843	19.2934	1.12e-05	5.15e-05		3.83585	-1.15732	8.54246	0.00346957	0.0151519
ODF2L	1.32681	5.94159	38.0854	6.77e-10	6.17e-09		1.11713	6.05722	10.4982	0.00119492	0.00624178
PLD5	-4.59527	-0.733608	12.1451	0.000492179	0.00163407		-4.42439	-1.21075	14.0728	0.000175864	0.00120322
L3MBTL1	-2.81453	1.48595	36.4302	1.58e-09	1.37e-08		-1.89168	0.375915	10.3878	0.00126853	0.00654861
CD37	1.63169	2.56023	23.1714	1.48e-06	8.03e-06		4.8638	2.40889	55.7346	8.29e-14	3.63e-12
GPNMB	1.5181	10.4142	14.3126	0.000154821	0.000572857		3.21657	10.4197	27.5184	1.56e-07	2.28e-06
MAPT	-2.09901	1.46555	32.2217	1.38e-08	1.04e-07		-1.63863	0.971326	7.07091	0.00783452	0.030227
CRIP1	2.01635	5.23675	28.2753	1.05e-07	6.89e-07		3.96655	5.22542	49.9707	1.56e-12	5.59e-11
SMKR1	2.01772	0.31978	9.16922	0.0024612	0.00691021		4.75732	0.205764	15.2776	9.28e-05	0.000690545
SERPINA1	2.37889	3.4858	24.2004	8.68e-07	4.91e-06		9.63479	3.45435	107.293	3.84e-25	5.82e-23
NLGN1	-3.32222	0.8733	18.2535	1.93e-05	8.54e-05		-5.56863	3.01166	52.757	3.77e-13	1.5e-11
CD28	2.97657	2.97045	37.8972	7.46e-10	6.72e-09		7.64744	3.00852	89.5447	3e-21	3.1e-19
HLA-DQB1	0.72482	5.90552	6.51095	0.0107212	0.0252229		13.3219	5.5807	112.954	2.21e-26	3.73e-24
TNKS1BP1	-0.559999	5.7449	7.03563	0.00799036	0.0195029		-1.33134	5.89262	10.5432	0.00116617	0.00611124
SLC30A7	1.29794	6.60681	33.2705	8.02e-09	6.28e-08		0.859489	6.75983	7.07598	0.00781239	0.0301778
FAM225A	3.30531	1.3173	26.1046	3.23e-07	1.96e-06		5.66391	1.34331	31.3036	2.21e-08	3.78e-07
FST	-0.963377	2.93188	6.05107	0.0138979	0.031531		-4.68092	5.46662	89.5875	2.93e-21	3.05e-19
HIF1AN	-0.575053	5.38697	6.92037	0.00852194	0.0205949		-1.10727	5.43994	13.3523	0.000258111	0.00168114
FMNL2	1.0816	6.85845	24.9768	5.8e-07	3.38e-06		1.92241	6.77302	29.4458	5.75e-08	9.15e-07
LOC643201	6.21461	-0.504244	25.2455	5.05e-07	2.96e-06		7.02238	-0.591767	13.6314	0.00022243	0.00147517
LRRC63	3.46649	-0.767354	15.9328	6.56e-05	0.000260187		6.43184	-0.956821	19.6356	9.37e-06	9.04e-05
IKZF1	0.851569	4.36945	9.69423	0.00184848	0.00535178		8.10964	4.01298	129.505	5.26e-30	1.2e-27
BMPR1B	1.42775	3.01512	7.15049	0.00749434	0.0184264		3.67929	2.98155	15.8648	6.8e-05	0.000526087
PRRX1	4.44629	9.80086	226.743	3.06e-51	4.62e-48		1.8964	10.2179	16.3331	5.31e-05	0.000422144
SUGCT	3.05263	2.88818	46.1521	1.09e-11	1.27e-10		1.42564	3.18625	7.91804	0.00489443	0.0203288
C7orf57	2.48816	0.670525	17.5806	2.75e-05	0.000117931		3.801	0.590044	15.0464	0.000104899	0.000767277
FMNL3	2.31456	6.79423	108.921	1.69e-25	1.15e-23		2.38339	6.95507	46.5493	8.93e-12	2.84e-10
ZFPM2-AS1	4.38892	2.52518	66.2915	3.89e-16	8.03e-15		5.9994	2.68538	39.3231	3.59e-10	8.72e-09
TNFSF13B	1.4052	2.6054	13.8987	0.000192937	0.000698889		2.38774	2.54715	13.5723	0.000229552	0.00151519
FPR3	2.56916	4.94344	86.367	1.49e-20	5.27e-19		12.7369	4.99692	200.468	1.65e-45	1.1e-42
TLR8	2.87119	2.60215	27.4861	1.58e-07	1.01e-06		10.3221	2.61657	81.9968	1.36e-19	1.19e-17
CD300E	2.71258	1.84494	30.6391	3.11e-08	2.22e-07		9.59223	1.87731	44.0405	3.22e-11	9.44e-10
ATP1B1	-1.92143	5.43559	26.8363	2.21e-07	1.38e-06		-1.46128	4.61099	14.8709	0.000115123	0.000832128
GZMA	1.59524	1.79169	6.13593	0.0132462	0.0302739		9.27179	1.61446	43.2555	4.8e-11	1.36e-09
HEYL	1.2052	3.25387	6.38692	0.0114964	0.0268062		2.86245	3.19637	16.3152	5.36e-05	0.000425719
PON2	-0.618462	5.04653	7.68344	0.00557297	0.01422		-1.42455	5.24925	20.5217	5.9e-06	5.99e-05
PALM	-1.66595	1.27041	9.52046	0.00203193	0.00582792		-3.35347	2.27368	24.0286	9.49e-07	1.15e-05
MPEG1	2.07154	6.85369	61.0006	5.71e-15	1.02e-13		10.0394	6.84335	251.25	1.39e-56	2.11e-53
LMOD1	-1.90297	3.15291	25.164	5.27e-07	3.08e-06		-5.10793	5.73126	66.0974	4.29e-16	2.68e-14
PLXDC2	1.09364	9.31625	10.8775	0.000973407	0.00301654		4.20191	9.15631	34.4922	4.28e-09	8.44e-08
SOX4	1.05756	6.09363	18.3048	1.88e-05	8.33e-05		1.47222	6.0822	11.5749	0.000668465	0.0037888
EFEMP1	-0.997496	5.3107	7.2168	0.00722242	0.0178159		-5.06116	8.25112	122.357	1.93e-28	3.84e-26
FAM78A	1.78003	1.97609	19.6106	9.49e-06	4.41e-05		3.52501	1.89666	24.8944	6.06e-07	7.76e-06
OR51E1	2.02169	0.236734	7.01834	0.00806788	0.019663		4.84885	0.0133918	20.3627	6.41e-06	6.46e-05
TNFAIP6	4.88787	5.94246	282.344	2.32e-63	2.1e-59		4.13012	6.20987	89.9668	2.42e-21	2.56e-19
VAV1	1.52516	2.19292	11.6977	0.000625772	0.00202849		9.67431	1.97385	79.6974	4.36e-19	3.7e-17
PRKAR1B	-1.14282	1.02519	8.62305	0.00331935	0.0089959		-2.64372	1.45307	15.634	7.69e-05	0.000584348
KRT18	-2.22841	1.13019	10.6192	0.0011192	0.00342438		-5.60246	3.26753	51.4879	7.2e-13	2.75e-11
OLFML2A	0.928585	5.34882	14.393	0.000148355	0.000550283		2.18293	5.21416	20.8557	4.95e-06	5.12e-05
NDN	-1.81441	2.03555	13.8229	0.000200876	0.000726049		-4.25319	3.73606	57.1785	3.98e-14	1.87e-12
NCR3LG1	2.07031	4.34546	33.5493	6.95e-09	5.5e-08		1.36998	4.57251	6.96809	0.0082976	0.0317224
FGF7	-1.76385	2.75458	9.33008	0.00225423	0.00639557		-4.94827	5.30922	42.8046	6.05e-11	1.69e-09
NEFL	1.8746	3.90557	13.0547	0.000302517	0.00105427		6.77931	3.87198	39.0991	4.03e-10	9.68e-09
ADAMDEC1	2.60878	3.24705	34.6804	3.89e-09	3.18e-08		7.90579	3.28943	66.373	3.73e-16	2.35e-14
NYNRIN	-0.889903	4.11063	7.83463	0.00512545	0.0132235		-1.55561	4.26145	15.2666	9.34e-05	0.000693974
CXCR3	1.59919	1.24844	12.2342	0.000469212	0.00156413		8.65156	1.00648	55.7367	8.29e-14	3.63e-12
HNRNPA1	-0.550545	4.79881	6.53475	0.0105787	0.024946		-0.952179	4.78261	6.97507	0.00826528	0.031635
PNMAL2	-2.63179	0.471549	17.2422	3.29e-05	0.000138998		-2.78859	0.268997	15.5988	7.83e-05	0.000594252
TBATA	3.31005	-1.62033	6.19599	0.012804	0.0294155		5.19827	-1.91771	8.57073	0.00341609	0.014979
HDHD2	-0.880246	4.62402	16.9075	3.92e-05	0.000163534		-0.764388	4.30158	6.22653	0.012585	0.0443618
CARKD	-0.837909	4.46043	14.054	0.000177632	0.000648118		-0.973196	4.26221	8.04524	0.00456234	0.0191589
MIR548F5	3.72865	-0.966424	7.59783	0.00584385	0.0147943		2.76577	-1.12301	6.33936	0.0118088	0.0421767
ALDH2	-3.71727	7.15954	165.528	7.01e-38	1.8e-35		-1.11875	4.77165	8.46584	0.00361879	0.0157134
CAPG	1.22825	5.9718	14.8739	0.000114942	0.000435084		2.12533	5.98688	15.0433	0.000105073	0.000768114
FPR1	3.48266	2.39655	48.597	3.14e-12	3.9e-11		8.67005	2.49206	67.5678	2.04e-16	1.3e-14
APOBEC3G	2.1663	3.56019	59.4566	1.25e-14	2.14e-13		1.36954	3.78273	9.1548	0.00248067	0.0114649
IL2RG	0.714985	4.47176	5.75813	0.0164125	0.0364027		11.8219	4.09389	136.993	1.21e-31	3.26e-29
SLC4A10	3.36386	-0.833068	10.1257	0.00146216	0.00433027		4.77142	-1.04152	11.7072	0.000622576	0.00357349
TGFB3	3.05994	6.24586	110.561	7.38e-26	5.26e-24		2.90302	6.47719	31.2166	2.31e-08	3.94e-07
DOK4	-1.36769	3.6772	13.0056	0.000310563	0.00107774		-1.75585	3.52821	15.4971	8.26e-05	0.000622018
TALDO1	-1.18368	6.4121	26.1902	3.09e-07	1.88e-06		-1.03576	5.99919	10.9801	0.000920945	0.00499311
TNFSF8	1.80164	2.39408	22.1282	2.55e-06	1.32e-05		7.22604	2.25388	72.6314	1.56e-17	1.13e-15
GPAT2	-1.41845	-0.793577	5.8516	0.0155629	0.0347825		-2.32557	-0.521848	10.1931	0.00140967	0.0071492
NAA16	-0.850499	4.11894	11.0868	0.000869451	0.00272896		-0.96763	3.95254	7.73557	0.00541436	0.0221962
PNPLA3	-3.0261	3.94264	38.8346	4.61e-10	4.29e-09		-1.73931	2.41927	9.96019	0.00159961	0.00794865
PHF20L1	0.988464	7.2934	21.3225	3.88e-06	1.94e-05		0.821744	7.37322	6.28561	0.0121722	0.0431431
SNHG8	-1.72238	4.66521	46.8732	7.57e-12	8.97e-11		-1.45236	4.15185	11.6649	0.000636899	0.00363765
HMGA1	-0.913114	6.4613	7.23644	0.00714386	0.0176486		-1.70799	6.78871	13.2729	0.000269273	0.00174501
CD300C	3.11518	0.0159796	21.3363	3.85e-06	1.93e-05		7.44648	-0.117953	34.1865	5.01e-09	9.78e-08
TAP2	0.744385	6.43051	5.4493	0.0195762	0.0423407		1.40808	6.33165	11.8026	0.000591488	0.00341735
LOC100132215	-2.2942	0.845205	30.5117	3.32e-08	2.36e-07		-1.71454	0.187028	9.14857	0.00248912	0.0114913
IFNAR2	1.13788	4.3155	19.6135	9.48e-06	4.41e-05		1.19674	4.32966	10.791	0.00101993	0.00546074
MCEMP1	4.12798	-0.684197	5.90065	0.0151353	0.0339612		5.21488	-0.836332	7.38853	0.0065641	0.0261283
ARRB2	1.20686	3.59173	20.9431	4.73e-06	2.33e-05		1.55711	3.55676	16.1743	5.78e-05	0.000454297
LAT2	1.3243	2.72569	14.3957	0.000148143	0.000549608		3.40397	2.58825	32.2643	1.35e-08	2.4e-07
KLK4	4.94185	2.39102	26.462	2.69e-07	1.65e-06		10.2618	2.55532	22.1012	2.59e-06	2.86e-05
MRO	3.79716	1.24028	27.6534	1.45e-07	9.29e-07		4.92584	1.25836	35.1306	3.08e-09	6.27e-08
HTRA1	3.36234	8.79092	66.6359	3.27e-16	6.82e-15		1.99212	9.14771	9.61712	0.00192771	0.00932147
SLC2A12	-1.98072	3.44133	29.482	5.64e-08	3.87e-07		-2.0312	3.08285	20.9096	4.81e-06	4.99e-05
NDFIP2	-2.256	6.19728	87.9609	6.68e-21	2.46e-19		-1.3891	5.22313	12.8267	0.000341706	0.0021396
GDNF	4.33595	4.97694	58.7095	1.83e-14	3.03e-13		3.36943	5.25603	25.7709	3.84e-07	5.15e-06
TMEM38B	1.11785	4.41686	14.4894	0.000140947	0.000525712		1.64658	4.40226	12.6583	0.000373903	0.00231369
ADAMTS12	4.46065	6.25206	130.298	3.53e-30	3.97e-28		1.7253	6.68498	9.49179	0.00206394	0.00982863
CFH	1.75004	7.40482	23.356	1.35e-06	7.36e-06		1.55234	7.66133	6.72418	0.00951143	0.0354805
WDR66	0.581013	4.23999	5.25447	0.0218905	0.0465617		3.93192	3.82202	57.2595	3.82e-14	1.8e-12
HOXB5	5.82011	1.8009	78.3694	8.55e-19	2.46e-17		8.03671	1.91672	44.646	2.36e-11	7.06e-10
IVD	-1.61565	3.83665	23.7485	1.1e-06	6.12e-06		-2.67839	4.15618	29.4758	5.66e-08	9.02e-07
PAWR	-1.32579	4.36494	20.0871	7.4e-06	3.52e-05		-1.17136	4.00571	8.42684	0.00369723	0.0160124
MYH1	5.85205	0.516174	12.528	0.000400907	0.00135566		4.79548	0.500874	9.48775	0.00206848	0.00984496
BAHD1	-0.684977	3.48824	7.42525	0.00643148	0.0160729		-1.08607	3.44012	7.57546	0.00591683	0.0239734
FBXO44	-1.3416	2.08367	9.79986	0.00174526	0.00508055		-2.23145	2.29395	15.8781	6.76e-05	0.000522883
FLT4	1.63253	2.2116	8.17778	0.00424066	0.0111814		9.7894	2.08036	59.5085	1.22e-14	6.15e-13
IRF8	0.861892	3.03568	5.54773	0.0185047	0.0403558		7.01566	2.69339	64.4518	9.89e-16	5.89e-14
COL10A1	3.03679	5.78699	30.4789	3.38e-08	2.39e-07		6.63333	5.97381	37.1883	1.07e-09	2.38e-08
CD93	1.20636	7.45494	17.3262	3.15e-05	0.000133421		8.05929	7.26687	118.851	1.13e-27	2.07e-25
LRRC75A-AS1	-1.29124	7.55108	37.2974	1.01e-09	8.97e-09		-1.72564	7.47398	28.0259	1.2e-07	1.79e-06
SGCG	-2.36179	-0.569524	13.4398	0.000246338	0.000873621		-4.41906	0.607589	39.8567	2.73e-10	6.8e-09
ATP6V0A2	0.564132	5.98678	8.48853	0.00357392	0.00960384		0.891879	5.88224	7.75573	0.00535423	0.0219766
AIF1	2.00161	4.89931	44.7993	2.18e-11	2.42e-10		12.5994	4.85992	199.99	2.1e-45	1.35e-42
PCDHB8	2.01123	0.68204	11.7964	0.000593456	0.00193432		2.52664	0.596023	9.93075	0.0016254	0.0080648
C1QTNF6	3.58943	5.8806	105.931	7.63e-25	4.75e-23		2.61829	6.16939	37.7848	7.9e-10	1.8e-08
HOXB6	5.45083	1.40294	66.1426	4.19e-16	8.6e-15		7.61806	1.4865	64.8431	8.11e-16	4.93e-14
NOX4	2.41418	3.14479	23.2872	1.4e-06	7.6e-06		1.91316	3.36762	7.15169	0.00748935	0.0291793
GNAI1	-1.53575	6.32068	36.9887	1.19e-09	1.04e-08		-0.904322	5.6621	6.83366	0.00894558	0.0337827
LINC00944	4.94851	0.670195	44.2873	2.84e-11	3.1e-10		8.30732	0.687425	28.8944	7.64e-08	1.19e-06
ARL4C	2.68346	8.2789	70.3748	4.9e-17	1.15e-15		3.66039	8.43856	33.0902	8.8e-09	1.62e-07
FAP	5.38036	7.3728	190.576	2.38e-43	1.27e-40		1.21206	7.90397	8.58637	0.00338689	0.0148763
MPPED2	-1.70982	-0.77242	6.85366	0.00884601	0.0212786		-2.91418	-0.172416	12.4643	0.000414805	0.00252853
HR	-3.92307	5.15957	95.5947	1.41e-22	6.44e-21		-1.59655	3.18072	8.33028	0.00389897	0.0167555
DCHS1	2.59627	5.35261	55.215	1.08e-13	1.62e-12		1.32419	5.70607	7.07101	0.00783413	0.030227
ST6GALNAC4	-0.837254	3.38388	5.53887	0.0185986	0.0405118		-1.14378	3.10091	8.85133	0.00292875	0.0131932
DPEP2	1.41956	0.45367	6.6423	0.00995855	0.0236623		4.66941	0.177166	28.0628	1.17e-07	1.76e-06
MMP11	5.5632	8.24148	50.0313	1.51e-12	1.95e-11		5.3924	8.53002	21.1356	4.28e-06	4.5e-05
SLC7A1	-1.11876	7.13271	17.6778	2.62e-05	0.000112609		-1.97736	7.32399	39.0345	4.16e-10	9.96e-09
LOC101929690	6.63648	1.05914	59.8323	1.03e-14	1.79e-13		5.4416	1.14417	19.8783	8.25e-06	8.1e-05
COL3A1	4.60981	12.5364	144.424	2.87e-33	4.48e-31		2.14016	12.9369	17.9208	2.3e-05	0.000199367
PTPDC1	0.834132	3.78482	11.528	0.000685562	0.0022018		1.04753	3.74882	6.19329	0.0128236	0.0450602
GATA6	-1.37521	2.66468	7.91619	0.00489944	0.0126946		-1.99319	2.66651	15.9275	6.58e-05	0.000510602
ASNS	-1.08122	3.7654	7.83247	0.00513158	0.0132355		-3.83548	5.60959	52.1586	5.12e-13	2.01e-11
GPR3	4.08931	2.81537	73.9152	8.15e-18	2.09e-16		2.08305	3.10274	14.744	0.000123138	0.000883569
RAB31	3.31581	7.95563	82.9112	8.58e-20	2.79e-18		1.95488	8.25438	25.5652	4.28e-07	5.67e-06
NMI	0.844842	4.50401	8.20718	0.00417249	0.0110241		1.38379	4.39134	14.6854	0.000127026	0.00090719
CARD6	0.941213	5.2913	10.1553	0.00143884	0.00427239		2.59824	5.08378	31.9119	1.61e-08	2.84e-07
SAMSN1	2.04203	3.64148	23.6722	1.14e-06	6.34e-06		11.304	3.57687	128.906	7.11e-30	1.61e-27
PDE8B	-1.08816	2.29777	9.47406	0.00208398	0.00596679		-3.00065	3.19242	33.3647	7.64e-09	1.43e-07
MIR17HG	-2.02749	2.02882	21.1488	4.25e-06	2.11e-05		-1.70843	1.60354	9.13202	0.00251174	0.0115822
SLFN11	3.33065	5.49921	132.671	1.07e-30	1.28e-28		1.30199	5.90468	15.6152	7.76e-05	0.000589368
HOXB2	4.74786	2.8453	104.188	1.84e-24	1.09e-22		2.34705	3.13251	17.1485	3.46e-05	0.000286795
LINC01443	3.00327	0.81335	11.9018	0.000560807	0.00183765		4.51587	0.787759	12.218	0.000473303	0.00282428
PCDHB10	1.10821	2.63178	8.93916	0.00279121	0.00772535		3.0466	2.4533	20.3372	6.49e-06	6.54e-05
SMAP2	0.700731	5.37247	10.2977	0.00133193	0.00398829		1.1332	5.2922	10.6675	0.00109036	0.00577861
HOXB3	3.91996	3.14264	89.3234	3.35e-21	1.3e-19		4.26437	3.3162	47.2929	6.11e-12	1.98e-10
DNMBP	-0.766159	5.59816	12.1605	0.00048813	0.00162152		-1.31772	5.62231	20.4395	6.15e-06	6.22e-05
NPC1	0.929216	6.99287	14.3806	0.000149332	0.00055368		0.78733	7.04149	6.4912	0.010841	0.0393759
HAGLR	1.43647	3.36454	17.3923	3.04e-05	0.000129376		6.72942	3.26018	57.0919	4.16e-14	1.94e-12
CDKN1B	-0.899595	5.87319	19.8712	8.28e-06	3.89e-05		-0.883209	5.60314	8.86859	0.0029012	0.0130867
GLTSCR2	-1.66798	5.68285	55.3016	1.03e-13	1.56e-12		-1.22106	5.02148	11.9198	0.000555405	0.00324063
HGF	2.72148	4.53919	23.1564	1.49e-06	8.08e-06		3.7539	4.72793	21.4424	3.65e-06	3.9e-05
PROSER2-AS1	-4.86455	-0.97889	22.1983	2.46e-06	1.28e-05		-4.62143	-1.12634	20.8265	5.03e-06	5.18e-05
IL15RA	1.49414	4.61956	22.1855	2.48e-06	1.28e-05		1.62091	4.71112	10.1812	0.00141883	0.00717664
NECAB1	1.57485	2.93251	16.7656	4.23e-05	0.000175185		1.73017	2.97365	10.2924	0.00133582	0.00682644
ZNF425	-1.08977	1.62022	9.68738	0.00185538	0.0053709		-1.49011	1.50153	8.03414	0.00459039	0.0192525
RPLP0P2	5.6477	4.54175	61.1816	5.2e-15	9.36e-14		4.18943	4.81284	9.85439	0.00169427	0.00834955
SALL2	-1.60476	1.57181	7.87442	0.0050139	0.0129634		-2.65294	2.09756	16.051	6.17e-05	0.000481918
SMYD3	3.12804	5.10703	93.9094	3.3e-22	1.44e-20		2.2334	5.4028	18.3353	1.85e-05	0.000164986
ATP1A2	-4.13614	0.772549	35.3084	2.81e-09	2.35e-08		-2.98576	-0.673417	8.17635	0.00424401	0.0180308
FYCO1	-1.39003	5.93981	28.136	1.13e-07	7.38e-07		-1.57743	5.85844	15.9252	6.59e-05	0.000510963
LINC01522	3.94407	-1.077	10.6027	0.0011292	0.00345149		6.15036	-1.2901	10.323	0.0013138	0.00674069
SYT6	1.77033	0.20584	7.1081	0.00767363	0.0188314		3.75984	-0.119829	8.86697	0.00290376	0.0130947
PCDHB16	0.748185	3.73739	7.64662	0.0056879	0.0144724		2.77001	3.50329	21.5742	3.4e-06	3.65e-05
BIN2	1.26704	2.67224	13.4521	0.000244726	0.000868587		8.59349	2.42889	87.4749	8.54e-21	8.35e-19
NKAPL	-1.41416	-0.0181684	9.10052	0.00255536	0.00714247		-2.07249	0.142726	11.8694	0.000570647	0.00331757
DNM3OS	3.195	5.42668	100.714	1.06e-23	5.62e-22		1.05555	5.87421	6.90489	0.00859603	0.032647
SELPLG	1.93133	3.52297	34.422	4.44e-09	3.6e-08		2.21487	3.58289	22.4029	2.21e-06	2.5e-05
CPXM1	3.39284	4.87823	93.7109	3.65e-22	1.59e-20		4.22131	5.05556	47.2915	6.12e-12	1.98e-10
OGT	-0.569794	7.13996	6.48908	0.0108539	0.0254952		-1.18835	7.19454	15.2192	9.57e-05	0.000707518
ATP6V0D2	3.80545	3.31365	14.2819	0.000157374	0.000581589		11.2052	3.49484	35.6842	2.32e-09	4.82e-08
CCDC36	-2.56059	-0.369095	16.3354	5.31e-05	0.000215026		-3.37333	0.130995	17.735	2.54e-05	0.000217788
RASSF4	1.70364	3.29392	29.0942	6.89e-08	4.67e-07		1.77378	3.38277	13.623	0.000223436	0.00148066
MPP1	1.4935	4.1888	34.7327	3.78e-09	3.1e-08		1.0547	4.33195	10.1021	0.00148097	0.00744534
INMT	-2.08027	0.188451	13.4549	0.000244366	0.000867648		-5.02109	2.41693	40.3414	2.13e-10	5.4e-09
ZFPM2	1.53852	4.31572	17.068	3.61e-05	0.000151496		1.67203	4.43801	8.60783	0.0033472	0.0147369
USP53	-0.828088	5.80217	12.6626	0.000373036	0.00127186		-3.85642	7.69678	146.357	1.08e-33	3.63e-31
MMP8	5.79703	0.663137	58.3929	2.15e-14	3.54e-13		6.10828	0.700913	32.45	1.22e-08	2.2e-07
NEU1	1.72178	5.33877	49.7823	1.72e-12	2.19e-11		1.44897	5.49752	15.2621	9.36e-05	0.000695326
NKX3-2	3.71681	-0.500611	13.5478	0.000232567	0.000829333		6.85223	-0.635867	16.0157	6.28e-05	0.000490078
MEF2C	0.769253	5.32589	7.27998	0.00697274	0.0172747		2.16442	5.1368	18.1589	2.03e-05	0.000179651
LYVE1	2.01712	3.55496	8.00813	0.00465678	0.0121459		5.80886	3.33078	51.4233	7.44e-13	2.82e-11
G6PD	-1.104	4.38466	12.9821	0.000314482	0.00109072		-2.22687	4.60583	47.5309	5.41e-12	1.76e-10
ANK2	1.40016	6.40766	18.0517	2.15e-05	9.44e-05		2.30812	6.47002	16.1748	5.78e-05	0.000454297
FAM83G	-2.259	2.25153	28.1647	1.11e-07	7.28e-07		-1.90924	1.47202	7.53049	0.00606635	0.024426
TPP1	1.58338	8.34368	35.9436	2.03e-09	1.73e-08		0.976473	8.56501	7.16314	0.00744168	0.0290206
C10orf35	-2.75769	0.18878	19.7455	8.85e-06	4.14e-05		-2.06756	-0.524421	7.14122	0.00753321	0.0293092
DIRC1	3.06137	0.0114469	8.85662	0.00292028	0.00803465		3.02509	0.00822922	6.00084	0.014299	0.0491377
FLJ32255	1.99086	3.85815	21.9997	2.73e-06	1.4e-05		1.74599	4.08129	7.73058	0.00542932	0.0222466
MS4A14	3.38272	2.22978	41.5393	1.16e-10	1.16e-09		10.0563	2.31091	59.6503	1.13e-14	5.78e-13
SSH3	-1.05369	3.46586	16.008	6.31e-05	0.000251211		-1.15272	3.17763	7.50047	0.0061683	0.0247888
CNGA3	4.88223	0.642849	42.5988	6.72e-11	6.97e-10		2.71133	0.723295	6.28609	0.0121689	0.0431405
HIVEP2	1.18664	7.86246	26.5013	2.63e-07	1.62e-06		1.13687	7.92053	11.1956	0.000819936	0.0045009
CLEC5A	1.2783	3.44771	7.95534	0.00479457	0.012464		10.9858	3.26122	88.4548	5.2e-21	5.21e-19
MARK4	-0.687145	4.11597	7.75748	0.00534907	0.0137144		-1.12157	4.07087	9.65355	0.00188986	0.00917557
ADAMTS16	3.35552	1.56868	24.2456	8.48e-07	4.8e-06		7.04095	1.62083	23.1497	1.5e-06	1.75e-05
EXTL1	-4.22824	0.0686631	16.7481	4.27e-05	0.000176682		-3.72542	-0.0875247	9.53549	0.00201536	0.0096449
PIR	-3.42364	0.627768	40.7537	1.73e-10	1.7e-09		-1.887	-0.826283	6.12411	0.013335	0.0464767
MIR155HG	1.57092	1.09327	9.07737	0.00258792	0.0072212		1.6135	1.06582	6.28149	0.0122006	0.0432162
ACVR2A	-1.25771	5.78375	29.9333	4.47e-08	3.11e-07		-1.36517	5.56259	9.41052	0.00215744	0.0101936
TREM2	2.37169	2.15762	33.4696	7.24e-09	5.7e-08		9.79508	2.10968	81.6809	1.6e-19	1.39e-17
SLCO5A1	2.06804	1.20506	6.62161	0.0100749	0.0239144		3.17258	1.17541	10.8781	0.000973063	0.00523663
LPIN3	-1.19461	3.7118	17.5738	2.76e-05	0.000118319		-1.27374	3.41856	10.9719	0.000925042	0.00501207
HLA-DOA	0.811766	4.27302	7.87225	0.00501992	0.0129771		11.6654	3.93882	146.848	8.47e-34	2.89e-31
WHAMMP2	-1.17211	1.6315	6.08022	0.0136704	0.0310825		-2.16638	2.35045	10.2311	0.00138094	0.00701202
HOXB-AS3	6.15553	0.313122	51.0072	9.2e-13	1.22e-11		7.94024	0.311769	34.5102	4.24e-09	8.37e-08
FCHSD1	-1.79739	2.49825	16.438	5.03e-05	0.000204684		-2.54271	2.66093	20.9588	4.69e-06	4.88e-05
IL32	1.55117	2.92745	14.1521	0.000168613	0.000617701		3.88107	2.80803	23.0948	1.54e-06	1.79e-05
CHSY3	3.03306	2.90682	35.3988	2.69e-09	2.25e-08		2.03727	3.17293	9.02034	0.00266991	0.0121823
TRABD2A	2.10131	1.9769	10.8851	0.000969405	0.00300723		4.57329	2.0194	15.1138	0.000101218	0.000745148
MACROD2	-4.22406	2.20507	90.9796	1.45e-21	5.9e-20		-3.13143	1.01377	22.2515	2.39e-06	2.67e-05
NXT1	0.702709	3.11193	5.68759	0.0170853	0.0376825		1.26674	2.95489	7.85727	0.00506168	0.0209455
ROR1-AS1	1.81889	2.28334	9.2826	0.00231341	0.00654194		3.07527	2.3479	10.2373	0.0013763	0.00699271
HRH1	2.45176	5.19266	68.8296	1.07e-16	2.38e-15		2.15114	5.35988	42.2187	8.16e-11	2.21e-09
CDIP1	-1.1793	3.28462	13.319	0.000262737	0.000926696		-1.78764	3.34615	16.6387	4.52e-05	0.000364846
THEMIS2	3.05095	4.01805	123.873	8.98e-29	8.74e-27		4.22034	4.16119	51.554	6.97e-13	2.67e-11
IRS2	-1.10314	3.79988	10.4013	0.00125926	0.00379391		-3.12292	4.90066	68.5892	1.21e-16	7.92e-15
GPR183	0.888138	3.95283	9.55791	0.00199089	0.00571928		5.28169	3.6789	63.7425	1.42e-15	8.2e-14
RGS7BP	-3.13663	0.279754	18.0241	2.18e-05	9.55e-05		-2.90381	-0.18744	10.6754	0.00108568	0.00576111
C15orf52	-1.55645	2.21265	12.9174	0.000325541	0.00112476		-3.71925	3.46376	56.0522	7.06e-14	3.16e-12
CYB5A	-3.68393	7.00507	136.09	1.91e-31	2.56e-29		-1.48174	4.49486	20.9991	4.59e-06	4.79e-05
NCF4	1.4847	2.25532	16.0042	6.32e-05	0.000251539		7.53475	2.08486	61.9901	3.45e-15	1.87e-13
EMR2	1.4036	4.10733	17.5887	2.74e-05	0.000117478		6.03191	3.97305	79.6201	4.54e-19	3.83e-17
KIAA0226L	2.33588	3.03449	46.2643	1.03e-11	1.2e-10		2.89141	3.10499	21.9927	2.74e-06	3.01e-05
GSC	2.52597	-0.130396	10.4744	0.0012104	0.00366992		4.50661	-0.278869	14.0558	0.000177465	0.00121226
BTN3A3	1.10849	4.56242	11.5316	0.000684216	0.00219826		1.55249	4.5259	13.3611	0.000256895	0.00167518
BCL2A1	1.70182	1.78055	14.8784	0.000114666	0.000434221		9.39863	1.68698	36.6966	1.38e-09	2.99e-08
CCL3	3.00138	2.31372	28.0907	1.16e-07	7.54e-07		10.0756	2.36883	58.703	1.83e-14	8.97e-13
MMP2	5.13207	11.7114	195.155	2.38e-44	1.35e-41		1.71422	12.1641	11.4562	0.000712553	0.00400072
ZNF667-AS1	-1.90328	3.51328	15.5308	8.12e-05	0.000316311		-2.00734	3.65552	9.08664	0.00257484	0.0118348
SUCLA2	-0.716772	5.39891	11.9358	0.000550659	0.00180767		-0.959335	5.2818	8.31188	0.00393865	0.0169039
RPL23P8	-1.28274	4.45636	31.6151	1.88e-08	1.39e-07		-1.72435	4.40877	28.4585	9.57e-08	1.46e-06
MSR1	4.20308	5.87521	86.5985	1.33e-20	4.73e-19		11.4929	6.0677	282.675	1.96e-63	1.03e-59
FCGR1A	3.74686	1.67505	55.0538	1.17e-13	1.75e-12		5.26898	1.73919	36.9611	1.21e-09	2.64e-08
RASSF7	-3.48632	2.21055	71.1246	3.35e-17	7.97e-16		-3.12802	1.02581	17.0214	3.7e-05	0.000304232
HPCAL1	1.2845	3.93935	18.9984	1.31e-05	5.96e-05		1.20515	4.02715	6.85757	0.00882668	0.0333865
ARRDC1	-0.897837	1.73287	6.99381	0.00817922	0.019897		-1.49598	1.58936	6.18121	0.0129114	0.0453212
LDLRAD4	0.683749	5.42677	8.13817	0.00433429	0.0113918		3.87553	5.09186	39.6098	3.1e-10	7.65e-09
IGDCC3	2.78532	-1.04652	6.47747	0.0109251	0.0256511		6.23717	-1.29046	10.774	0.00102934	0.00550584
ANGPTL2	3.1554	8.43992	126.122	2.89e-29	3.03e-27		2.23647	8.72556	24.0001	9.63e-07	1.17e-05
MYO7A	1.68238	1.91764	20.5932	5.68e-06	2.76e-05		6.38684	1.77504	41.0942	1.45e-10	3.8e-09
SNCG	-1.51755	-0.0428905	9.43108	0.00213339	0.0060938		-2.36945	0.258802	15.6216	7.74e-05	0.000587924
TMEM123	-0.891713	7.32996	18.762	1.48e-05	6.67e-05		-0.99004	7.1138	10.4922	0.00119877	0.00625797
TCN2	2.21058	3.45994	32.0831	1.48e-08	1.11e-07		1.96585	3.5966	12.351	0.000440746	0.00266423
THEM4	0.571062	4.61944	6.24808	0.0124328	0.0287121		1.11181	4.46751	10.1115	0.0014735	0.00741447
LOC79160	6.44046	0.548485	57.69	3.07e-14	4.95e-13		4.49604	0.604609	17.9277	2.29e-05	0.000198754
HTRA3	3.7547	5.03005	61.5344	4.35e-15	7.88e-14		3.10627	5.3183	19.6666	9.22e-06	8.91e-05
LOC102724297	1.98637	-0.438075	7.97736	0.00473659	0.0123332		6.70779	-0.726731	23.5181	1.24e-06	1.46e-05
SLC25A4	-1.58839	3.95031	32.5214	1.18e-08	9.01e-08		-2.04356	3.81811	33.5748	6.86e-09	1.3e-07
MUC1	-2.82678	4.60466	55.2208	1.08e-13	1.62e-12		-1.80563	3.09899	15.8276	6.94e-05	0.000534547
FOXS1	2.39231	-0.897081	6.94076	0.00842534	0.0203887		3.94541	-1.13483	10.0884	0.00149204	0.00749423
BASP1	3.55223	7.8239	124.158	7.78e-29	7.65e-27		1.08986	8.30775	6.16993	0.012994	0.0455539
SNORD114-17	3.44031	-0.52334	15.4645	8.41e-05	0.000326696		2.29924	-0.580365	6.05225	0.0138886	0.0480886
SLC2A1-AS1	-2.87753	-0.0768584	22.212	2.44e-06	1.27e-05		-2.38202	-0.846213	9.52415	0.00202786	0.00968807
CRYAB	-1.32731	5.38775	12.8099	0.000344789	0.00118449		-2.92018	6.191	41.1791	1.39e-10	3.65e-09
CDKL5	0.988887	4.48092	17.6392	2.67e-05	0.000114621		1.38186	4.44096	11.5366	0.000682407	0.00385493
OAS3	1.01986	6.47176	8.0024	0.00467154	0.0121773		2.41504	6.34216	17.636	2.67e-05	0.000227904
ZDHHC2	-1.33502	5.4035	10.7933	0.00101867	0.0031423		-1.71315	5.38109	13.5951	0.000226779	0.00149984
TKT	-0.956478	6.00813	15.1369	0.0001	0.000383368		-2.12379	6.39553	32.002	1.54e-08	2.71e-07
PAN3	-1.04293	4.98935	19.315	1.11e-05	5.1e-05		-0.852134	4.62162	6.89061	0.00866498	0.0328696
SLC27A5	-1.83088	0.818929	21.6051	3.35e-06	1.69e-05		-1.39124	0.257977	6.42289	0.0112659	0.0406456
TMEM132B	-1.97331	1.41994	5.38066	0.0203611	0.0437404		-2.41722	1.91054	8.73895	0.00311484	0.013893
PDE7B	2.82976	4.86591	106.146	6.85e-25	4.3e-23		2.50246	5.08219	28.8511	7.82e-08	1.21e-06
RNASE1	2.59587	5.94254	79.7228	4.31e-19	1.29e-17		9.80866	6.00014	250.639	1.88e-56	2.63e-53
TLR6	0.702544	3.50053	6.23715	0.0125098	0.0288605		2.27726	3.23877	25.423	4.6e-07	6.07e-06
NEAT1	-0.868806	9.4027	7.49149	0.00619912	0.0155631		-0.990976	9.2256	6.1451	0.0131777	0.0460723
RGS17	3.36709	1.54079	60.8284	6.23e-15	1.11e-13		2.04482	1.7212	11.4833	0.000702258	0.00395088
SEMA4G	-2.45139	2.09612	34.4246	4.43e-09	3.59e-08		-1.64779	1.16235	7.23365	0.00715496	0.0280925
